1 **How smart was *T. rex*? Testing claims of exceptional cognition in dinosaurs and the**  
2 **application of neuron count estimates in palaeontological research**

3

4 Caspar, Kai R.<sup>1,2\*</sup>, Gutiérrez-Ibáñez, Cristián<sup>3\*†</sup>, Bertrand, Ornella C.<sup>4</sup>, Carr, Thomas<sup>5</sup>,  
5 Colbourne, Jennifer<sup>6</sup>; Erb, Arthur<sup>7</sup>, George, Hady.<sup>8</sup>, Holtz, Thomas R., Jr.<sup>9,10</sup>, Naish,  
6 Darren<sup>11</sup>; Wylie, Douglas R.<sup>3</sup>; Hurlburt, Grant R.<sup>12†</sup>

7

8 \*These authors contributed equally; † corresponding authors

9

10 <sup>1</sup>Institute of Cell Biology, Heinrich Heine University Düsseldorf, Düsseldorf, Germany;<sup>2</sup>Department of  
11 Game Management and Wildlife Biology, Faculty of Forestry and Wood Sciences, Czech University of  
12 Life Sciences, Prague, Czech Republic;<sup>3</sup>Department of Biological Sciences, University of Alberta,  
13 Edmonton, Canada;<sup>4</sup>Institut Català de Paleontologia Miquel Crusafont, Universitat Autònoma de  
14 Barcelona, Barcelona, Spain <sup>5</sup>Department of Biology, Carthage College, Kenosha, Wisconsin, USA  
15 <sup>6</sup>Comparative Cognition Unit, Messerli Research Institute, University of Veterinary Medicine Vienna,  
16 Vienna, Austria;<sup>7</sup> School of GeoSciences, Grant Institute, University of Edinburgh, Edinburgh,  
17 Scotland, UK;<sup>8</sup>School of Earth Sciences, University of Bristol, Bristol, UK; <sup>9</sup>Department of Geology,  
18 University of Maryland, College Park, Maryland, USA;<sup>10</sup>Department of Paleobiology, National Museum  
19 of Natural History, Washington, DC, USA;<sup>11</sup> School of Biological Sciences, Faculty of Environment  
20 and Life Sciences, University of Southampton, Southampton, United Kingdom;<sup>12</sup>Department of  
21 Natural History, Royal Ontario Museum, Toronto, Ontario, Canada

22

23 **Key words:** endocast, palaeoneurology, brain evolution, comparative cognition, graphic  
24 double integration

25

26 **Abstract**

27 Recent years have seen increasing scientific interest in whether neuron counts can  
28 act as correlates of diverse biological phenomena. Lately, Herculano-Houzel (2022) argued  
29 that fossil endocasts and comparative neurological data from extant sauropsids allow to  
30 reconstruct telencephalic neuron counts in Mesozoic dinosaurs and pterosaurs, which might  
31 act as proxies for behavior and life history traits in these animals. According to this analysis,  
32 large theropods such as *Tyrannosaurus rex* were long-lived, exceptionally intelligent animals  
33 with “macaque- or baboon-like cognition” whereas sauropods as well as many ornithischian  
34 dinosaurs displayed an ectothermic physiology. Besides challenging established views on

35 Mesozoic dinosaur biology, these claims raise questions on whether neuron count estimates  
36 could benefit research on fossil animals in general. Here, we address these findings by  
37 revisiting Herculano-Houzel's (2022) neurological estimates and arguments. We present  
38 revised estimates of encephalization and telencephalic neuron counts in dinosaurs, which  
39 we derive from phylogenetically informed modeling and an amended dataset of endocranial  
40 measurements. For large-bodied theropods in particular, we recover significantly lower  
41 neuron counts than previously proposed. Furthermore, we review the suitability of  
42 neurological variables such as neuron count estimates and relative brain size to predict  
43 cognitive complexity, metabolic rate and life history traits in dinosaurs, coming to the  
44 conclusion that they are flawed proxies of these biological phenomena. Instead of relying on  
45 such neurological estimates when reconstructing Mesozoic dinosaur biology, we argue that  
46 integrative approaches are needed to approach this complex subject.

47

## 48 **Introduction**

49 The Late Cretaceous North American theropod dinosaur *Tyrannosaurus rex* is a  
50 superlative predator, being among the largest, heaviest, and most powerful (in terms of bite  
51 force) terrestrial carnivores of all time (Gignac and Erickson 2017; Sakamoto 2022;  
52 Henderson, 2023). Recently, Herculano-Houzel (2022) proposed that anthropoid primate-  
53 level intelligence should be added to *T. rex*'s already impressive predatory resume based on  
54 high estimated numbers of telencephalic neuron counts in large-bodied theropod taxa. This  
55 conclusion emerged from a paradigm whereby neurological variables estimated from  
56 endocasts can, so it is claimed, can be used to infer metabolic parameters, social behaviors,  
57 and longevity in fossil species. Here, we test whether this approach and its remarkable  
58 prospects withstand scrutiny.

59 The hypothesis of exceptional intelligence in dinosaurs such as *T. rex* challenges the  
60 consensus of crocodile-like cognition in these animals, a position informed by comparative  
61 anatomical data (Rogers, 1998; Witmer and Ridgely, 2009; Hurlburt et al., 2013). Moreover,

62 this claim bears ramifications that extend beyond specialized biological disciplines due to its  
63 potential to create long-lasting impacts on the public's perspective on dinosaurs, evolution,  
64 and the scientific process. Given the extreme contrast between Herculano-Houzel's (2022)  
65 proposal and more traditional perspectives on dinosaur biology, we revisit the claim of  
66 exceptional intelligence in these animals through an assessment of her methodology and a  
67 reanalysis of the underlying data. By integrating perspectives from both paleontology and  
68 neontology, we evaluate the potential benefits and limitations of neuron count estimation in  
69 research on the behavior and physiology of fossil species. We begin with a brief review of  
70 dinosaur paleoneurology and a discussion of how Herculano-Houzel's (2022) approach aims  
71 to expand the field's methodological tool kit.

72

### 73 **Dinosaur paleoneurology and the prospects of neuron count estimates for the field**

74 Paleoneurology is a subfield of paleontology dedicated to research on the nervous  
75 systems of extinct animals. Because soft tissues are not readily preserved in the fossil record,  
76 paleobiologists rely on endocasts when studying the brains of extinct species (Paulina-  
77 Carabajal et al. 2023). An endocast can be a natural (infilling), artificial (mold) or virtual  
78 (digitally reconstructed) cast of the endocranial cavity that is formed by the bones of the  
79 braincase.

80 The study of extinct species' endocasts, including those of dinosaurs, can be traced  
81 back to the 1800s (e.g., Cuvier, 1812; Marsh, 1879). However, the field was truly defined by  
82 Edinger (1929) who effectively introduced the concept of geological time to neurobiological  
83 studies. Before her, anatomists made comparisons between endocasts and fresh brains, but  
84 without considering the stratigraphic context (Buchholtz & Seyfarth, 2001). Jerison (1973)  
85 followed up on Edinger's work by studying brain evolution in a quantitative manner and  
86 developed the encephalization quotient (EQ) as an estimate of relative brain size, applicable  
87 to both extant and extinct species. Later, the advent of X-ray computed tomography at the end  
88 of the 1990s transformed the field and provided novel ways in which the neurosensory

89 systems of extinct species could be studied (e.g., Brochu, 2000; Witmer et al., 2008). Despite  
90 these crucial innovations, however, paleoneurology has so far remained largely restricted to  
91 the measurement and comparison of gross morphology, limiting our understanding of how the  
92 brains of Mesozoic dinosaurs and other extinct animals worked.

93

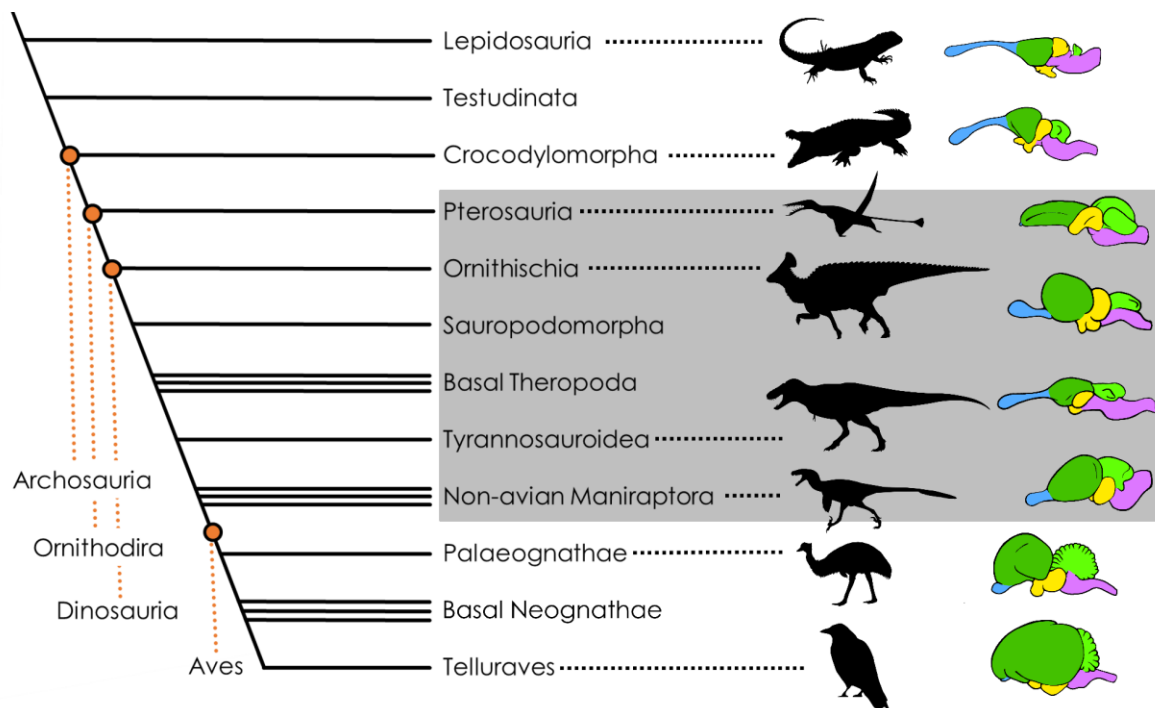

94

95 **Figure 1:** Simplified phylogeny of the Sauropsida with a focus on the taxon Ornithodira and  
96 representative color-coded brain morphologies, excluding the pituitary (not to scale). Blue: olfactory  
97 bulb and tracts, Dark green: pallium (= cerebrum), Lime green: cerebellum, Yellow: diencephalon and  
98 optic tectum; Violet: brain stem. Olfactory structures, pallium and subpallium comprise the  
99 telencephalon. The gray overlay indicates extinct taxa, the brain morphologies of which are  
100 approximated. Note that the brain morphology in tyrannosauroids is conspicuously plesiomorphic when  
101 compared to the other ornithodirans pictured here (see e.g., Giffin, 1989). Silhouettes were taken from  
102 PhyloPic (listed from top to bottom): *Morunasaurus* (in public domain), *Crocodylus* (in public domain),  
103 *Rhamphorhynchus* (by Scott Hartman), *Olorotitan* (by ДиБгд, vectorized by T. Michael Keesey),  
104 *Tyrannosaurus* (by Matt Dempsey), *Dromaeosaurus* (in public domain), *Dromaius* (by Darren Naish),  
105 *Corvus* (in public domain).

106 Pterosaurs and dinosaurs (the latter including birds) form the clade Ornithodira (Fig.  
107 1), the closest extant relatives of which are crocodylians (Fig. 1). Together, both lineages,  
108 which separated about 250 million years ago, comprise the clade Archosauria (e.g., Legendre  
109 et al., 2016). Next to birds, crocodylians therefore represent a critical reference point in  
110 reconstructing the nervous systems of extinct ornithodirans.

111 Interestingly, highly disparate patterns of endocranial tissue organization are realized  
112 in these two extant clades. One fundamental difference relates to the portion of the  
113 endocranial cavity which is occupied by the brain rather than by the associated meningeal  
114 tissues (including the dura mater and arachnoid mater) and cerebrospinal fluid (Fig. 2). In  
115 crocodylians, nervous tissue only fills a fraction of the braincase (Hopson, 1979; Jirak &  
116 Janacek, 2017; Watanabe et al. 2019). Longitudinal venous sinuses course along the dorsal  
117 and ventral aspect of the brain, obscuring its true shape in casts of the braincase. Furthermore,  
118 the size of the brain relative to both the endocranial volume and total body size, decreases  
119 during crocodylian ontogeny, even over the course of adulthood (Hurlburt et al., 2013; but note  
120 that the overall brain volume increases with body size, even in adults - Ngwenya et al., 2013).

121 Endocast morphology indicates that the endocranial cavity in most non-avian  
122 dinosaurs was organized in crocodylian-like fashion and comparative studies suggest that this  
123 configuration was indeed ancestral for the clade Archosauria (Witmer et al., 2008; Hurlburt et  
124 al., 2013; Fabbri & Bhullar, 2022). For tyrannosaurids specifically, which are among the best-  
125 studied dinosaurs when it comes to palaeoneurology, endocasts representing different  
126 ontogenetic stages suggest that brain size (relative to endocranial volume) decreased with  
127 age (Brusatte et al., 2009; Bever et al., 2013), as is the case in modern crocodylians.  
128 Therefore, crocodylian and most dinosaurian endocasts do not faithfully capture the volume  
129 and anatomy of the brain, particularly its posterior regions such as the cerebellum (Watanabe  
130 et al., 2019). This contrasts with the situation in birds for which endocasts represent excellent  
131 brain size proxies (e.g., Iwaniuk and Nelson, 2002), which is also the case for most mammals  
132 (Bertrand et al., 2022).

133 The avian pattern probably evolved at the root of the theropod dinosaur clade

134 Maniraptoriformes, which includes ornithomimosaur (‘ostrich-mimic’ dinosaurs) and  
135 maniraptorans (the bird-like oviraptorosaurs, dromaeosaurids and kin, and birds themselves)  
136 (Osmólska, 2004; Balanoff et al., 2013). Maniraptoriform brains have enlarged cerebral and  
137 cerebellar regions that almost fully occupy the endocranial cavity. With the exception of at  
138 least some pachycephalosaurs (Giffin, 1989), there is no evidence that the brains of other  
139 dinosaurs similarly contacted the endocranial surface. Blood vessel impressions indicate that  
140 the lateral surface of the cerebrum closely approached the endocranial surface in ornithomimids  
141 (Evans et al., 2009) but this does not necessarily indicate a bird-like endocranial fill, as the  
142 same feature is present in crocodylians (G. R. Hurlburt, pers. obs.). Pterosaurs are similar to  
143 maniraptoriforms in also possessing brains that fit tightly into the endocranial cavity (Witmer  
144 et al., 2003).

145         Aside from general endocranial tissue organization, the neuroarchitecture of the  
146 forebrain in birds and crocodylians differs notably from one another (Ulinski & Margoliash,  
147 1990; Briscoe et al., 2018; Briscoe & Ragsdale, 2018). Comparisons with other sauropsids  
148 demonstrate that again the crocodylian condition is the more plesiomorphic one (Briscoe &  
149 Ragsdale, 2018). To which extent non-avian dinosaurs and pterosaurs resembled the two  
150 extant archosaur groups in regards to neuroarchitecture cannot be reliably reconstructed,  
151 since the latter lacks osteological correlates.

152         The inferred brain anatomy of various dinosaur groups has been discussed elsewhere  
153 (Paulina-Carabajal et al. 2023) and reviewing it here is beyond the scope of this article. We  
154 aim instead to focus on what endocast-based methods potentially reveal about the behavior  
155 and cognition of extinct species. While considering the aforementioned limitations, endocasts  
156 from fossil ornithomimids allow us to reasonably estimate basic neuroanatomical measures  
157 such as EQ, as well as to deduce specific sensory specializations (e.g., Witmer et al., 2003;  
158 Witmer & Ridgely, 2009; Zelenitsky et al., 2011). Nonetheless, it is generally assumed that the  
159 predictive power of these data in elucidating the cognitive capacities of a fossil species is low  
160 (Paulina-Carabajal et al., 2023). Researchers have long sought to identify robust  
161 morphological correlates of cognition but have found traditional proxies such as EQ and

162 absolute brain size to be limited and problematic regarding their conceptual justifications (Van  
163 Schaik et al., 2021). Current debates focus on whether refined neuroanatomical measures  
164 such as “cognitive brain size” (Van Schaik et al., 2021) and brain region-specific neuron counts  
165 (Herculano-Houzel, 2011; Kabadayi et al., 2016; Logan et al., 2018; Sol et al., 2022) might be  
166 able to overcome these issues. The quantification of these, however, seemed out of reach for  
167 vertebrate palaeontology.

168         With this in mind, the approach proposed by Herculano-Houzel (2022) is of great  
169 potential significance: It entails that endocasts of extinct taxa can be used to model neuron  
170 counts if neurological data from related extant species can be taken into account. If valid, this  
171 technique would potentially allow researchers to elucidate aspects of brain physiology that  
172 cannot be inferred from endocast morphology alone. Herculano-Houzel & Kaas (2011) and  
173 Herculano-Houzel et al. (2011) pioneered this approach for fossil hominins and extinct giant  
174 rodents, but Herculano-Houzel (2022) was first in applying this methodology to fossil sauropsid  
175 groups separated from their extant relatives by hundreds of millions of years of evolution,  
176 namely pterosaurs and Mesozoic dinosaurs. Indeed, Herculano-Houzel (2011, 2017, 2022)  
177 has argued emphatically that neuron counts represent reliable estimates for cognitive abilities  
178 in extant vertebrates, markedly outperforming other measures such as relative or absolute  
179 brain size. If we accept this premise, accurate modeling of neuron counts in dinosaurs based  
180 on endocast volumes and comparative neurological data might appear as a promising new  
181 method to elucidate the behavior and cognitive capacities of these animals.

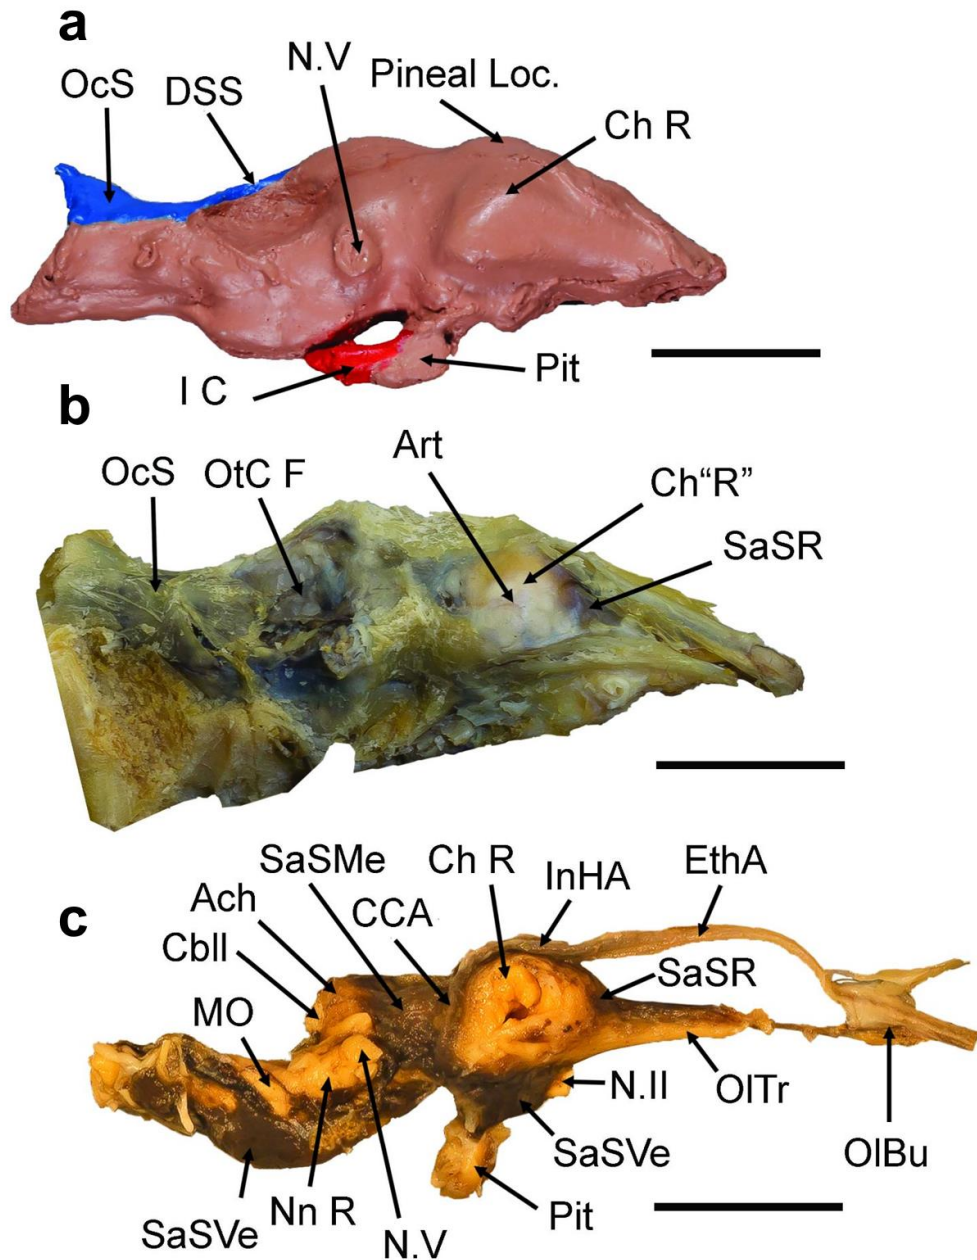

182

183 **Figure 2:** The endocast and endocranial tissue organization in the American alligator (*Alligator*  
184 *mississippiensis*), illustrating the plesiomorphic condition within the clade Archosauria. Scale bar = 2  
185 cm in all cases. **a:** Endocast of a wild *A. mississippiensis* (Fla.F&G.HarvestTag 937095), Dorsal cranial  
186 length (DCL), 342.90 mm, right lateral view. Reduced in size to match proportions of brain in **b** & **c**. **b:**  
187 Dura mater around the brain of *A. mississippiensis*, specimen CITES FLM 12- 29409, DCL, 380 mm,  
188 left lateral view (reversed). **c:** Brain within arachnoid of FLM 12-29409. Brown-red material is dried  
189 blood filling the subarachnoid space (**SaS**), right lateral view. **Abbreviations:** **Ach**, arachnoid mater  
190 (covering the cerebellum); **Art**, artery on external wall of dura mater over the lateral pole of the



191 cerebrum; **Cbll**, cerebellum; **CCA**, caudal cerebral artery; **Ch L** or **R**, left or right cerebral hemisphere;  
192 **DSS**, dorsal sagittal sinus; **EthA**, common ethmoid artery; **I C**, internal carotid artery; **InHA**,  
193 interhemispheric artery; **MO**, medulla oblongata; **N.II**, optic nerve; **N.V**, (cast of) trigeminal nerve; **Nn R**,  
194 roots of nerves IX-XI; **OC**, occipital condyle; **OcS**, occipital sinus; **OIBu & Tr**, olfactory bulb & tract; **OtC**  
195 **F**, fossa of otic capsule; **Pineal Loc**, pineal gland location; **Pit**, pituitary gland; **SaSMe**, mesencephalic  
196 subarachnoid space; **SaSR**, rostral SaS; **SaSve**, ventral SaS; **SN.I**, first spinal nerve. The rostral end  
197 of the cerebrum is below the arrow for **SaSR** in **B**. Both specimens are housed in the private collection  
198 of G. R. Hurlburt.

199

## 200 **The methodology and rationale of Herculano-Houzel (2022)**

201 Herculano-Houzel (2022) reconstructed relative brain size and neuron counts for 29  
202 dinosaur and pterosaur species based on comparative data from extant non-avian  
203 sauropsids (“reptiles” in the colloquial sense) and birds (Olkowicz et al., 2016; Kverková et  
204 al., 2022). Although we want to avoid lengthy discussions about taxonomy, it is worth noting  
205 that some of these are no longer considered valid taxonomic entities (see below; an updated  
206 nomenclature for relevant dinosaurs is included in Tab. 1). For instance, *Rhamphorhynchus*  
207 *muensteri* and *R. gemmingi* have long been synonymized (Bennett, 1995). Surprisingly,  
208 Herculano-Houzel (2022) inferred an ectothermic metabolism for one, and endothermy for  
209 the other based on assumptions about relative brain size.

210 Neuron count estimates for fossil taxa primarily concerned the telencephalon, a  
211 major brain region which is critically involved in cognitive and motor functions as well as the  
212 processing of sensory information. It encompasses the pallium (which equates to the  
213 cerebral cortex in humans and other mammals) and subpallium as well as the olfactory bulbs  
214 and tracts (Fig. 1). To understand the rationale behind the approach of reconstructing  
215 neuron counts in fossil species, two important matters must be pointed out: firstly, among  
216 jawed vertebrates, body size and brain size are highly correlated, exhibiting a constant  
217 allometric relationship overall (Tsuboi et al., 2018). It should be noted however, that scaling  
218 relationships can vary to some extent between major taxa as well as between early- and

219 late-diverging members of a clade (Ksepka et al., 2020; Bertrand et al., 2022). Secondly,  
220 neuronal densities (the number of neurons in a given volume of nervous tissue) can differ  
221 profoundly between different vertebrate taxa. For instance, most bird groups exhibit about  
222 2.5 times more telencephalic neurons than a lizard or turtle with a telencephalon of equal  
223 mass, and in members of the bird clade Telluraves (birds of prey, rollers, parrots, songbirds  
224 and kin) the difference reaches 3.2 fold (Kverková et al., 2022). This means that brain size  
225 alone is not a reliable predictor of neuron counts across distantly related clades (compare  
226 Herculano-Houzel et al., 2014; Olkowicz et al., 2016), which makes their inference in fossil  
227 groups inherently difficult.

228 To decide which neuronal density patterns apply to specific groups of dinosaurs and  
229 pterosaurs, Herculano-Houzel (2022) relied on brain x body mass regressions. The brain  
230 and body mass data used were taken from various literature sources and, as we attempt to  
231 show here, both are problematic. In the resulting regression plot, she identified theropods  
232 clustering distinctly from most other species. On average, they appeared to exhibit larger  
233 brains for a given body size than the remaining dinosaur or pterosaur taxa. When comparing  
234 the regression curves for extinct groups with those of living birds on the one hand and  
235 squamates and turtles on the other, Herculano-Houzel (2022) noted that the theropod  
236 regression fits with the avian one, while the remaining groups align more with the non-avian  
237 sauropsid regression line.

238 Based on these analyses, Herculano-Houzel (2022) made two critical assumptions:  
239 First, since only data from theropods align with those of endothermic extant sauropsids,  
240 namely birds, the other groups (aside from specific pterosaurs and ornithischians that cluster  
241 with theropods) should be considered ectothermic. Second, telencephalic neuron densities  
242 in theropod brain tissue should have been comparable to those found in certain extant bird  
243 taxa (precisely, to those found in a polyphyletic assemblage denoted as “pre-K-Pg birds” that  
244 includes Palaeognathae, Galloanserae and Columbiformes and which is considered to form  
245 a neurological grade: Kverková et al., 2022), whereas those of the other groups should  
246 resemble densities encountered in squamates and turtles. No further justification for these

247 notions is provided.

248 Applying the avian scaling regime, Herculano-Houzel (2022) estimated remarkably  
249 high telencephalic neuron counts in large-bodied theropods such as *Acrocanthosaurus*  
250 *atokensis* (2.1 billion) and *T. rex* (3.3 billion) which would exceed those of any extant bird  
251 and be comparable to large-bodied Old World monkeys such as baboons (Olkowicz et al.,  
252 2016). Based on this apparent similarity to anthropoid primates, she further speculated that  
253 these giant theropods would have crafted and used tools and exhibited cultural behaviors  
254 (Herculano-Houzel, 2022).

255 We regard the methodology of Herculano-Houzel (2022) as problematic and disagree  
256 with her physiological and behavioral interpretations. Before we attempt to replicate her  
257 findings with a more refined analytical approach, we want to enumerate the most important  
258 flaws of the article and how they affect the inferences made.

#### 259 **Issues with Herculano-Houzel's method and rationale**

260 A key problem for paleoneurology lies in the fact that an endocast does not  
261 necessarily reflect the morphology of an animal's brain. As discussed in previous sections,  
262 the endocasts of most non-avian dinosaurs differ markedly in size and shape from the actual  
263 brain, as is the case in crocodylians (Fig. 1). Unfortunately, not all studies that Herculano-  
264 Houzel (2022) derived her raw data from considered this issue (see below). In addition to  
265 that, the percentage of endocranial space filled by the brain, as well as its proportions may  
266 be further influenced by ontogeny (Bever et al., 2013; Hurlburt et al., 2013; Ngwenya et al.,  
267 2013; Jirak & Janacek, 2017; Hu et al., 2021). The latter point is relevant because  
268 Herculano-Houzel (2022) includes several specimens which correspond to juveniles rather  
269 than adults, and thus might have introduced biases to the dataset (see below). Interestingly,  
270 at least in crocodylians, neuronal densities in the brain are also affected by ontogenetic  
271 stage (Ngwenya et al., 2016).

272 To arrive at the estimated telencephalic neuron count of > 3 billion for *T. rex*,  
273 Herculano-Houzel (2022) assumed a brain mass of 343 g. However, this presupposes that

274 the endocast accurately reflects the volume of the brain in this species. While it has indeed  
275 been claimed that theropods such as *T. rex* had brains filling the entire endocranial cavity  
276 (Balanoff et al., 2013), this hypothesis is, as previously discussed, contradicted by multiple  
277 lines of evidence. More conservative inferences suggest a brain mass of approximately 200  
278 g (Hurlburt, 1996; Hurlburt, et al, 2013; Morhardt, 2016) or possibly even lower (this study;  
279 Tab. 1) for *T. rex*. Herculano-Houzel (2022) acknowledges these lower estimates but chose  
280 to rely on the inflated values for large theropod brain masses in accompanying figures and  
281 the article's Discussion section.

282 Besides that, the literature-derived brain mass estimates that were used for the  
283 analyses did in some cases include the olfactory tracts and bulbs (Franzosa & Rowe, 2005,  
284 Balanoff et al., 2013) while they omitted them in others (Hurlburt 1996; Hurlburt et al., 2013).  
285 This incongruence creates critical biases, affecting both the inference of telencephalic  
286 neuron counts and relative brain size estimates. The latter are additionally skewed by the  
287 fact that body masses were not determined via a uniform methodology. Instead, they were  
288 compiled from various sources that applied an array of approaches, varying greatly in  
289 precision. When compared to body mass estimates derived from stylopodial circumference,  
290 a well-established and robust method (Campione & Evans, 2020), some striking differences  
291 become apparent (Tab. 1; Herculano-Houzel et al., 2022).

292 Another flaw of Herculano-Houzel's (2022) approach is the lack of consideration for  
293 brain morphology to inform its analyses. To estimate telencephalic neuron numbers in fossil  
294 species, the mass of the telencephalon needs to be approximated first. For theropods,  
295 Herculano-Houzel (2022:6) extrapolates this variable from extant bird data while stating that  
296 "within a clade, brain mass has strongly predictive power to arrive at estimates of numbers of  
297 telencephalic neurons in a brain of known mass, once the neuronal scaling rules that  
298 presumably apply are known." However, this statement can only hold true if the general  
299 proportions of the telencephalon compared to the remaining brain are roughly constant in the  
300 group of concern, which is a precondition that Herculano-Houzel (2022) did not test for in the  
301 fossil sample. Indeed, avian brains only poorly reflect the brain morphologies found in the

302 majority of non-avian dinosaurs (reviewed by Paulina-Carabajal et al. 2023) and their  
303 general proportions are only comparable to those found among maniraptoriform theropods  
304 (Balanoff et al., 2013; Fig. 1). An important difference concerns the pallium, which crucially  
305 contributes to higher cognitive functions, and greatly increased in size within the  
306 maniraptoriform radiation (Balanoff et al., 2013). The same is true for the cerebellum, a part  
307 of the brain which is not encompassed by the telencephalon but is also involved in various  
308 aspects of cognition in amniotes (Spence et al., 2009). Thus, the telencephalic mass and  
309 proportions of non-maniraptoriform theropods, such as *T. rex*, cannot be adequately  
310 modeled based on extant birds. Similar limitations need to be considered when  
311 reconstructing traits of the pterosaur or sauropodomorph telencephalon based on extant  
312 non-avian sauropsids and they also apply to our own empirical approach.

313 Herculano-Houzel (2022) hypothesized that the inferred incongruence in relative  
314 brain size between theropods and other dinosaurs reflects differences in thermobiology,  
315 which would justify applying avian neuronal scaling schemes to the former.  
316 Sauropodomorphs as well as selected ornithischians and pterosaurs are instead suggested  
317 to be ectothermic due to their relatively smaller brains. Both of these assumptions are  
318 problematic: First, multiple lines of evidence suggest that ornithodiran endothermy evolved  
319 long before theropods emerged and was likely already present in the common ancestor of  
320 dinosaurs and pterosaurs (e.g., Grigg et al., 2022). We will revisit this evidence and how it  
321 challenges the brain size-derived hypothesis in more detail in the Discussion section of this  
322 paper. Herculano-Houzel (2022) only referenced a single article on dinosaur thermobiology,  
323 that of Wiemann et al. (2022), to defend her standpoint on the matter. The study in question  
324 applies a promising but novel technique to infer endothermy based on lipoxidation end  
325 products in fossil bone that still has to prove itself. Whereas it indeed suggests lowered  
326 metabolic rates in some ornithischians, it also infers an endothermic metabolism for  
327 pterosaurs and sauropodomorphs (Wiemann et al., 2022). Thus, its findings do not align with  
328 Herculano-Houzel's (2022) assumptions.

329 Second, a comparison of birds and mammals demonstrates that there is no uniform

330 relationship between neuron density and relative brain size or elevated metabolic rates. The  
331 neuronal density of non-primate mammals is only moderately increased compared to  
332 ectothermic sauropsids (Kverková et al., 2022; note that the difference is still statistically  
333 significant) and markedly lower than in birds, although mammals are large-brained. It is  
334 therefore not straight-forward to assume avian neuron densities in theropods simply because  
335 they exhibited endothermy or increased relative brain size. The other way around, the  
336 extensive evidence for endothermy in other dinosaurs and pterosaurs does not negate that  
337 these groups could have exhibited neuron densities similar to those found in extant  
338 ectothermic sauropsids.

339         Other issues relate to the statistics employed by Herculano-Houzel (2022). Despite  
340 dealing with a large multi-species dataset, the analyses do not take phylogeny into account,  
341 which is argued to be a measure to prevent mathematical artifacts. However, phylogenetic  
342 relationships between analyzed taxa need to be statistically addressed because shared  
343 ancestry can result in non-independence of species-specific data points (Revell et al., 2008).  
344 Such non-independence is known as the phylogenetic signal, and it has been prominently  
345 recovered for relative brain size in extant sauropsids (Font et al., 2019). Hence,  
346 phylogenetically-informed modeling is a necessity to adequately work with such datasets  
347 (Font et al., 2019).

348         In light of these substantial shortcomings, we attempt to replicate the findings of  
349 Herculano-Houzel (2022) with phylogenetically informed models of telencephalic neuron  
350 counts in fossil dinosaurs that acknowledge the issues lined out above. We do not include  
351 pterosaurs into this analysis due to difficulties with estimating their body mass (especially for  
352 taxa with incomplete postcrania such as *Scaphognathus*) and because of the unclear  
353 taxonomic and ontogenetic status of some of the few available endocasts.

354

355

356 **Empirical part: modeling neurological variables in dinosaurs**

357 **Endocast sample composition, with notes on endocranial volumes provided by**

358 **Hurlburt (1996)**

359 We estimated the mass of the brain (MBr, g; excluding the olfactory tracts and bulbs)  
360 as well as its size relative to body mass (MBd, g) in 28 Mesozoic dinosaur taxa for which  
361 data on endocranial volume (EV, ml) have been published (Tab. 1; Suppl. File 1). Note that  
362 this study does not aim at providing a comprehensive dataset on dinosaur brain sizes. Given  
363 the questions we want to address, its focus is on large-bodied theropods and an evaluation  
364 of previously published EV datasets. We included one endocast per species, except for *T.*  
365 *rex*, for which three adult endocasts (AMNH 5029, AMNH 5117, FMNH PR 2081) were  
366 considered. We only considered species for which we could calculate body mass based on  
367 stylopodial circumference (see below) to reliably infer encephalization. Due to this, our  
368 analysis does not cover all dinosaur species for which complete endocasts are available, nor  
369 all species that Herculano-Houzel (2022) included in her analyses (namely *Conchoraptor*  
370 *gracilis*, *Tsaagan mangas*, *Zanabazar junior*, unnamed troodontid IGM 100/1126). Juvenile  
371 specimens considered by that study (*Alioramus altai* IGM 100/1844, *Gorgosaurus libratus*  
372 ROM 1247, *Tyrannosaurus rex* CMN 7541 = “*Nanotyrannus lancensis*”) were omitted in this  
373 analysis to eliminate the confounding variable of ontogeny.

374 The only juvenile we include is *Bambiraptor feinbergi* KUVF 129737, which is one of  
375 the few maniraptoriform theropods that we can take into account. For this species, an adult  
376 femur (FIP 002) is available, allowing us to estimate body mass in fully grown individuals.  
377 Our method of body mass inference suggests that KUVF 129737 attained about 45% of  
378 adult body mass when it died. Data from similar-sized extant rheas (*Rhea americana*),  
379 palaeognath birds which are close neuroanatomical analogs to highly derived theropods  
380 such as *Bambiraptor* (Balanoff et al., 2013), suggest that adult brain mass is already  
381 approached at that point of somatic development (Picasso et al., 2011; Picasso, 2012;). We  
382 therefore combine the juvenile endocranial measurement of *Bambiraptor* with adult body

383 mass estimates.

384 Just as Herculano-Houzel (2022) did, we derive a significant portion of our EV values  
385 from Hurlburt (1996). However, many EV figures communicated in this reference must be  
386 considered problematic and were carefully bypassed here. We give detailed reasons for  
387 discarding or modifying data from Hurlburt (1996) and the references provided therein  
388 (Jerison, 1973; Hopson, 1979) in Suppl. File 1 Part A. In cases where EV values appeared  
389 doubtful but appropriate illustrations or photographs of specimens were available, we  
390 recalculated EV using manual graphic double integration (GDI; see below for methodology).  
391 This was done for 4 species (*Allosaurus fragilis*, *Euoplocephalus tutus*, *Kentrosaurus*  
392 *aethiopicus* & *Ornithomimus edmontonicus*; see Suppl. File 1 for details on specimens).

### 393 **Brain mass estimates**

394 We estimate the brain mass (MBr, g) of fossil dinosaurs from endocast volume (EV,  
395 mL). Because the specific gravity (density) of living amniote brain tissue approximates one  
396 (1.036 g/mL - Iwaniuk & Nelson, 2002), we use brain volume and mass interchangeably  
397 (Hurlburt et al., 2013; Herculano-Houzel, 2022). For maniraptoriform species, we assumed a  
398 brain:endocast ratio of 100%, which is consistent with empirical data on the relationship  
399 between MBr and EV in modern birds, which suggest contributions of meningeal tissue to  
400 endocast volume to be negligible (Iwaniuk & Nelson, 2002). In contrast to that, we assumed  
401 MBr:EV ratios of 31% and 42% to approximate brain mass in both non-maniraptoriform  
402 theropods and non-theropod dinosaurs. For these groups, many previous studies have  
403 assumed a 50% ratio (see Morhardt, 2016) while some even assumed 100% (Balanoff et al.,  
404 2013) or advocated for intermediate values (e.g., Evans et al., 2008; Knoll & Schwarz-  
405 Wings, 2009; Knoll et al., 2021). The widely adopted 50% ratio was originally proposed by  
406 Jerison (1973) and based on measurements from a likely subadult green iguana (*Iguana*  
407 *iguana*) and a mere visual estimate of endocranial filling in the tuatara (*Sphenodon*  
408 *punctatus*; the endocranial fill in this species is now known to be 30% in adults - Roese-  
409 Miron et al., 2023). We abandon the problematic 50% estimate and replace it here by the



410 two aforementioned ratios that are based on the morphology of extant crocodylians, the  
411 closest extant analogs to most non-avian dinosaurs in regards to endocranial tissue  
412 organization.

413 Excluding one anomalous value, the lowest MBr:EV ratio among the three longest  
414 American alligators (*Alligator mississippiensis*) studied by Hurlburt et al (2013) was found to  
415 be 31% ( $n_{\text{total}} = 12$ , note that this figure excludes the olfactory bulb and tract portions of the  
416 endocranial cavity). This is consistent with observations on the largest Nile crocodile  
417 (*Crocodylus niloticus*; a 16-year-old female) studied by Jirak & Janacek (2017) when  
418 excluding the olfactory tracts and bulb portion of the endocast. The 42% ratio is derived  
419 solely from American alligators. An endocranial fill of 42% was found in an adult female with  
420 a total length of 2.870 m, which roughly approximates both (a) the maximum length for a  
421 female American alligator and (b) the midpoint length within the size spectrum of sexually  
422 mature alligators (Hurlburt et al, 2013; Hurlburt & Waldorf, 2002; Woodward et al, 1991).

423 The majority of EV data for Mesozoic dinosaurs were taken and modified from the  
424 literature (detailed out in Tab. 1). In many cases, original sources communicated  
425 measurements that correspond to total EV. This is the volume of the entire endocast, often  
426 including the region of the olfactory tract and bulbs as well as portions of the cranial spinal  
427 cord among other structures. For our analysis, we exclusively relied on the so-called “brain”  
428 endocast volume instead (BrEV; Fig. 3), which was popularized by Jerison (1973) and has  
429 been commonly used since then (e.g., Hurlburt, 1996; Larsson et al., 2000; Paulina-  
430 Carabajal & Canale, 2010; Hurlburt et al., 2013). It excludes the spinal cord portion of the  
431 endocast caudal to cranial nerve XII, the volume of nerve trunks from infillings of respective  
432 foramina and blood vessel casts, the labyrinth of the inner ear, the infundibulum, the pituitary  
433 gland, and especially the volume of the olfactory lobes and tracts (Fig. 4), which are often  
434 only poorly preserved in fossil endocasts. In some dinosaurs, there is an obvious constriction  
435 and/or a change in surface morphology at the junction of the cerebrum and olfactory tract  
436 (e.g., *Euoplocephalus tutus* AMNH 5337 - Hopson, 1979; *Stegosaurus unguatus* CM 106 -

437 Galton, 2001; *Diplodocus longus* CM 11161- Witmer et al., 2008). If present, this was used  
438 as a landmark to delineate these brain regions from one another. In less obvious cases, the  
439 junction between the cerebrum and olfactory tract portion was assumed to be where the  
440 ventral curve of the rostral cerebrum flattens out to approach a horizontal orientation. When  
441 selecting the boundary, we erred towards a more rostral location, to assign as much of the  
442 endocast as part of the BrEV as seemed reasonable. In American alligators, the rostral  
443 termination of the cerebrum within the rostral subarachnoid space is clearly visible (Fig. 2C;  
444 SaSR) and consistent with the change in curvature referred to above.

445 We used manual GDI to extract BrEV from total EV (relevant details for each  
446 specimen are provided in Supplementary File 1 Part B). The method involves drawing an  
447 outline around two scaled orthogonal two-dimensional views of an endocast, and adding  
448 equally spaced lines perpendicular to the endocast midline (Fig. 3). The mean length (cm) of  
449 these lines in each view (i.e., dorsal, lateral) provides diameters D1 and D2. The volume  
450 (mL) of the desired region is calculated using these two diameters and the length (L, cm) in  
451 the formula for the volume (mL or cm<sup>3</sup>) of a cylinder where (all lengths in cm):

$$452 \quad \text{Volume [mL]} = (\pi)(0.25)(D1)(D2)(L)$$

453 GDI has been demonstrated to produce reasonable estimates of endocast volumes  
454 (Fig. 3). For instance, Jerison (1973) used GDI to calculate a total endocast volume of 536  
455 ml for a *T. rex* specimen (AMNH 5029), which was 101.13% of the 530 ml volume  
456 determined for it by means of water displacement (Osborn, 1912; Fig. 3). For the same  
457 specimen, Jerison (1973) calculated a 404 ml volume for the “brain region” of the endocast  
458 (extending from cranial nerve XII to the rostral cerebral limit), which was 106.04 % of the 381  
459 ml obtained by CT volumetry (Hurlburt et al., 2013).

## 460 **Body mass estimates**

461 We calculated the body mass (MBd, g) of the selected dinosaur taxa (and its mean  
462 absolute percent prediction error - PPE or %PE - Campione & Evans, 2020) in a

463 standardized manner based on the minimum femoral circumference (as well as humeral  
464 circumference in case of quadrupedal taxa) by aid of the  $QE()$  and  $cQE()$  functions from the  
465 MASSTIMATE package (Campione, 2020) in R (R Core Team, 2022). Data on relevant long  
466 bone dimensions were primarily obtained from Benson et al. (2017). Corresponding  
467 specimens as well as additional sources and information on stylopodium circumference  
468 measurements are listed in Tab. 1. To the best of our knowledge, all data correspond to  
469 adult specimens.

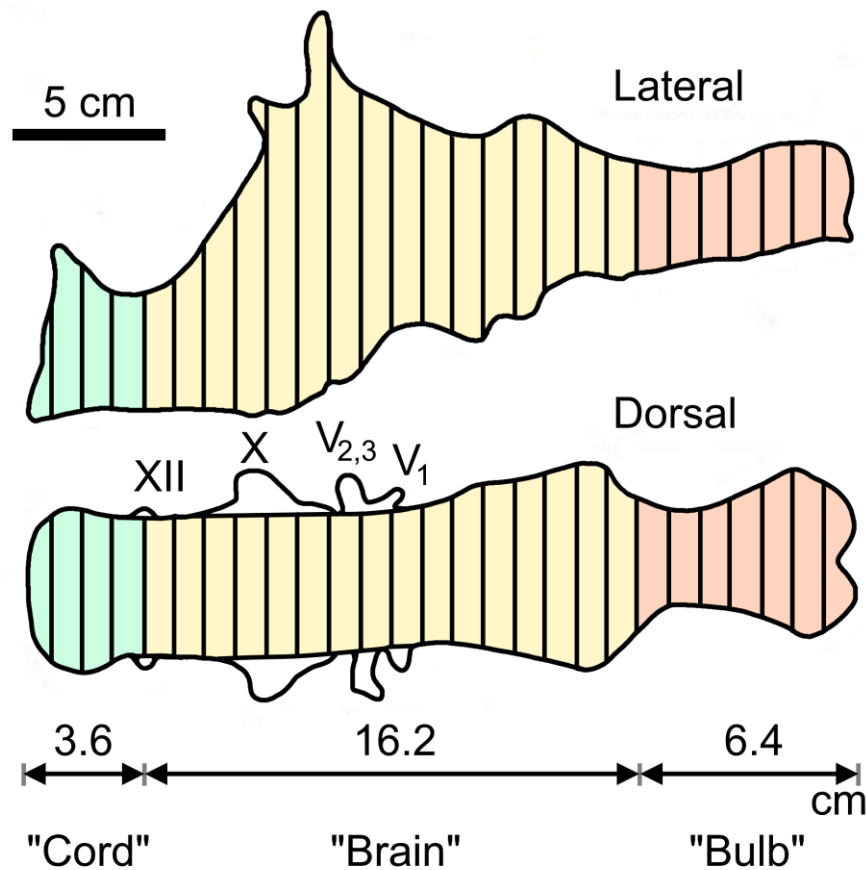

470

471 **Figure 3.** Exemplary graphic double integration (GDI) of the endocast of *Tyrannosaurus rex* AMNH  
472 5029. Equally spaced lines are drawn across the right lateral and dorsal views respectively. Mean  
473 lengths of the lines drawn across the "brain" portion (BrEV) were 4.8 cm and 6.6 cm for dorsal and  
474 lateral views respectively.  $BrEV = \pi \times 0.25 \times 4.8 \times 6.6 \times 16.2 = 404$  mL (the volume of the entire  
475 endocast was 536 mL). Abbreviations: "Bulb": Olfactory tract and bulbs; "Cord": spinal cord; V:  
476 Trigeminal nerve with its three branches (V<sub>1</sub>, V<sub>2</sub>, & V<sub>3</sub>); X: vagus nerve; XII: hypoglossal nerve.  
477 (Adapted from Fig. 2.7 in Jerison, 1973, p. 51).

478 **Table 1:** Estimates of brain (MBr, g; derived from endocranial volume, EV) and body mass (MBd, kg) in Mesozoic dinosaurs. For maniraptoriform theropods,  
479 we assumed that brain endocast volume equals brain volume. For non-maniraptoriform theropods and non-theropod dinosaurs, we assumed a  
480 brain:endocast ratio of 31 - 42 %. Body mass was calculated based on stylopodial circumference (femoral circumference (FC) for bipedal and femoral as well  
481 as humeral (HC) circumference for quadrupedal species). **Footnotes:** [1] *Bambiraptor feinbergi*. MBd from femur circumference, measured on a cast of the  
482 right femur of an adult specimen now in the collection of the Vertebrate Paleontology Division, ROM (FIP 002). Original elements of this specimen are now in  
483 the collection of the AMNH. [2] *Archaeopteryx lithographica*. MBd from FC (14.93 mm) estimated from femur length (60.5mm) of BMNH 37001 (Gatesy,  
484 1991). FC was calculated using the equation from Benson et al. (2017):  $\log_{10}(\text{Femur circumference estimate from femur length}) = 1.132 * \log_{10}(\text{Femur}$   
485  $\text{length}) - 0.8429$ . [3] *Carcharodontosaurus saharicus*. MBd from estimated femur circumference (FC = 417.52 mm) from Benson et al. (2017) for BSP 1922  
486 X46. The specimen has been destroyed and is no longer accessible. [4] *Sinraptor dongi*. MBd based on FC (283 mm) from Campione & Evans (2020),  
487 measurement taken from TMP 93.115.1 (cast of IVPP 10600). Benson et al. (2017) consider IVPP 10600 a subadult based on reported incomplete fusion of  
488 cervical vertebrae; However, Paulina-Carabajal and Currie (2012) noted that the degree of cranial suture fusion indicates that the specimen is an adult or at  
489 least a large subadult. We consider it an adult here. [5] *Tyrannosaurus rex* specimens. MBd based on FC values listed by Persons et al. (2020). For FMNH  
490 PR 2081 (“Sue”), but not the other individuals considered here, both FC and EV are available. We associated the EV (313.636 mL) of AMNH 5117 with the  
491 MBd (5515 kg) of BHI 3033 (“Stan”), as both specimens have been considered proxies for each other (G. M. Erickson, pers comm. To G.R. Hurlburt, 2005).  
492 The EV (381.8 mL) of AMNH 5029 is here linked to the MBd (6430 kg) of CM 9380 (holotype specimen) because it fell between MBd’s associated with EVs of  
493 FMNH PR 3081 and AMNH 5117. Besides our brain:endocast ratios, we also apply the 57% ratio proposed by Morhardt (2016) to this species.

494

495

| Species                                             | Group                        | Body mass (MBd) (kg) | Lower 25% PPE (kg) | Upper 25% PPE (kg) | FC (mm) | HC (mm) | MBd Spec      | MBd Source for FC & HC     | Brain Mass (MBr) (g) | MBr/EV | Br EV (mL/cm3) | EV Specmen              | EV Meth            | Original         |
|-----------------------------------------------------|------------------------------|----------------------|--------------------|--------------------|---------|---------|---------------|----------------------------|----------------------|--------|----------------|-------------------------|--------------------|------------------|
| <i>Bambiraptor feinbergi</i> <sup>[1]</sup>         | Non-avian maniraptoriform    | 8.0632               | 5.9966             | 10.1298            | 47      | NA      | FIP 002       | Cast of right femur        | 14                   | 1      | 14             | KUVP 129737             | Water displacement | Burnham          |
| <i>Citipati osmolskae</i>                           | Non-avian maniraptoriform    | 123.993              | 92.214             | 155.772            | 127     | NA      | IGM 100/978   | Benson et al. (2017), #321 | 22.05                | 1      | 22.05          | IGM 100/978             | CT                 | Balanoff         |
| <i>Khaan mckennai</i>                               | Non-avian maniraptoriform    | 21.9198              | 16.3018            | 27.5378            | 67.62   | NA      | IGM 100/1127  | Benson et al. (2017), #452 | 8.8                  | 1      | 8.8            | IGM 100/973             | CT                 | Balanoff         |
| <i>Shuvuuia deserti</i>                             | Non-avian maniraptoriform    | 3.0497               | 2.2681             | 3.8313             | 33      | NA      | IGM 100/1304  | Benson et al. (2017), #574 | 0.78                 | 1      | 0.78           | IGM 100/977             | CT                 | Balanoff         |
| <i>Ornithomimus edmontonicus</i>                    | Non-avian maniraptoriform    | 83.5238              | 62.1167            | 104.9309           | 110     | NA      | ROM 851       | Benson et al. (2017), #522 | 49.89                | 1      | 49.89          | NMC 12228               | GDI (this study)   | Photos of        |
| <i>Stenonychosaurus inequalis</i>                   | Non-avian maniraptoriform    | 47.3759              | 35.2335            | 59.52              | 89.5    | NA      | MOR 748 (MTC) | Benson et al. (2017), #621 | 45                   | 1      | 45             | RTMP 86.36.457 & 79.8.1 | Water displacement | Currie &         |
| <i>Archaeopteryx lithographica</i> <sup>[2]</sup>   | Non-avian maniraptoriform    | 0.3446               | 0.2563             | 0.4329             | 14.93   | NA      | BMNH 37001    | Gatesy, 1991               | 1.52                 | 1      | 1.52           | BMNH 37001              | CT                 | Domingu          |
| <i>Acrocanthosaurus atokensis</i>                   | Non-maniraptoriform theropod | 3454.954             | 2569.449           | 4340.46            | 426     | NA      | NCSM 14345    | Benson et al. (2017), #242 | 51.55                | 0.42   | 122.74         | OMNH 10146              | CT                 | Franzosa         |
| <i>Acrocanthosaurus atokensis</i>                   | Non-maniraptoriform theropod | 3454.954             | 2569.449           | 4340.46            | 426     | NA      | NCSM 14345    | Benson et al. (2017), #242 | 38.05                | 0.31   | 122.74         | OMNH 10146              | CT                 | Franzosa         |
| <i>Allosaurus fragilis</i>                          | Non-maniraptoriform theropod | 2541.814             | 1890.347           | 3193.28            | 381     | NA      | AMNH 680      | Benson et al. (2017), #253 | 41.37                | 0.42   | 98.5           | UUVP 294                | GDI (this study)   | Photo of         |
| <i>Allosaurus fragilis</i>                          | Non-maniraptoriform theropod | 2541.814             | 1890.347           | 3193.28            | 381     | NA      | AMNH 680      | Benson et al. (2017), #253 | 30.54                | 0.31   | 98.5           | UUVP 294                | GDI (this study)   | Photo of         |
| <i>Carcharodontosaurus saharicus</i> <sup>[3]</sup> | Non-maniraptoriform theropod | 3269.147             | 2431.265           | 4107.03            | 417.52  | NA      | BSP 1922 X46  | Benson et al. (2017), #307 | 94.08                | 0.42   | 224            | SGM-Din 1               | CT                 | Larsson          |
| <i>Carcharodontosaurus saharicus</i>                | Non-maniraptoriform theropod | 3269.147             | 2431.265           | 4107.03            | 417.52  | NA      | BSP 1922 X46  | Benson et al. (2017), #307 | 69.44                | 0.31   | 224            | SGM-Din 1               | CT                 | Larsson          |
| <i>Carnotaurus sastrei</i>                          | Non-maniraptoriform theropod | 1641.829             | 1221.028           | 2062.63            | 325     | NA      | MACN CH 894   | Benson et al. (2017), #308 | 45.49                | 0.42   | 108.3          | MACN CH-894             | CT                 | Cerroni & (2019) |
| <i>Carnotaurus sastrei</i>                          | Non-maniraptoriform theropod | 1641.829             | 1221.028           | 2062.63            | 325     | NA      | MACN CH 894   | Benson et al. (2017), #308 | 33.57                | 0.31   | 108.3          | MACN CH-894             | CT                 | Cerroni & (2019) |
| <i>Giganotosaurus carolinii</i>                     | Non-maniraptoriform theropod | 6136.771             | 4563.916           | 7709.625           | 525     | NA      | MUCPv-Ch1     | Benson et al. (2017), #399 | 94.5                 | 0.42   | 225            | MUCPv-CH 1              | CT                 | Paulina- (2010)  |
| <i>Giganotosaurus carolinii</i>                     | Non-maniraptoriform theropod | 6136.771             | 4563.916           | 7709.625           | 525     | NA      | MUCPv-Ch1     | Benson et al. (2017), #399 | 69.75                | 0.31   | 225            | MUCPv-CH 1              | CT                 | Paulina- (2010)  |
| <i>Majungasaurus crenatissimus</i>                  | Non-maniraptoriform theropod | 1614.201             | 1200.481           | 2027.92            | 323     | NA      | FMNH PR 2278  | Benson et al. (2017), #482 | 37.51                | 0.42   | 89.32          | FMNH PR 2100            | CT                 | Sampson          |
| <i>Majungasaurus crenatissimus</i>                  | Non-maniraptoriform theropod | 1614.201             | 1200.481           | 2027.92            | 323     | NA      | FMNH PR 2278  | Benson et al. (2017), #482 | 27.69                | 0.31   | 89.32          | FMNH PR 2100            | CT                 | Sampson          |

|                                        |                              |           |           |           |     |     |              |                            |        |      |        |                  |                                |                  |
|----------------------------------------|------------------------------|-----------|-----------|-----------|-----|-----|--------------|----------------------------|--------|------|--------|------------------|--------------------------------|------------------|
| <i>Sinraptor dongi</i> <sup>d1</sup>   | Non-maniraptoriform theropod | 1122.287  | 834.645   | 1409.929  | 283 | NA  | TMP 93.115.1 | Campione& Evans, 2020      | 39.9   | 0.42 | 91     | IVPP 10600       | CT                             | Paulina-C (2012) |
| <i>Sinraptor dongi</i>                 | Non-maniraptoriform theropod | 1122.287  | 834.645   | 1409.929  | 283 | NA  | TMP 93.115.1 | Campione& Evans, 2020      | 29.45  | 0.31 | 91     | IVPP 10600       | CT                             | Paulina-C (2012) |
| <i>Tarbosaurus bataar</i>              | Non-maniraptoriform theropod | 2345.113  | 1744.06   | 2946.165  | 370 | NA  | MPC-D 552/1  | Benson et al. (2017), #610 | 66.86  | 0.42 | 159.2  | PIN, no. 553-3/1 | Estimated from latex half-cast | Saveliev         |
| <i>Tarbosaurus bataar</i>              | Non-maniraptoriform theropod | 2345.113  | 1744.06   | 2946.165  | 370 | NA  | MPC-D 552/1  | Benson et al. (2017), #610 | 49.35  | 0.31 | 159.2  | PIN, no. 553-3/1 | Estimated from latex half-cast | Saveliev         |
| <i>Tyrannosaurus rex</i> <sup>5b</sup> | Non-maniraptoriform theropod | 8070.46   | 6002.001  | 10138.919 | 580 | NA  | FMNH PR 2081 | Persons et al., 2020       | 173.96 | 0.42 | 414.19 | FMNH PR 2081     | CT                             | Hurlbert         |
| <i>Tyrannosaurus rex</i>               | Non-maniraptoriform theropod | 8070.46   | 6002.001  | 10138.919 | 580 | NA  | FMNH PR 2081 | Persons et al., 2020       | 128.40 | 0.31 | 414.19 | FMNH PR 2081     | CT                             | Hurlbert         |
| <i>Tyrannosaurus rex</i>               | Non-maniraptoriform theropod | 6430.357  | 4782.256  | 8078.457  | 534 | NA  | CM 9380      | Persons et al., 2020       | 160.34 | 0.42 | 381.76 | AMNH 5029        | CT                             | Hurlbert         |
| <i>Tyrannosaurus rex</i>               | Non-maniraptoriform theropod | 6430.357  | 4782.256  | 8078.457  | 534 | NA  | CM 9380      | Persons et al., 2020       | 118.35 | 0.31 | 381.76 | AMNH 5029        | CT                             | Hurlbert         |
| <i>Tyrannosaurus rex</i>               | Non-maniraptoriform theropod | 6430.357  | 4782.256  | 8078.457  | 534 | NA  | CM 9380      | Persons et al., 2020       | 217.11 | 0.57 | 381.76 | AMNH 5029        | CT                             | Morhardt         |
| <i>Tyrannosaurus rex</i>               | Non-maniraptoriform theropod | 5515.247  | 4101.69   | 6928.805  | 505 | NA  | BHI 3033     | Persons et al., 2020       | 131.73 | 0.42 | 313.64 | AMNH 5117        | CT                             | Hurlbert         |
| <i>Tyrannosaurus rex</i>               | Non-maniraptoriform theropod | 5515.247  | 4101.69   | 6928.805  | 505 | NA  | BHI 3033     | Persons et al., 2020       | 97.23  | 0.31 | 313.64 | AMNH 5117        | CT                             | Hurlbert         |
| <i>Amargasaurus cazaui</i>             | Non-theropod dinosaur        | 10194.61  | 7581.73   | 12807.49  | 505 | 388 | MACN-N 15    | Benson et al. (2017), #20  | 35.28  | 0.42 | 84     | MACN-N 15        | CT                             | Paulina C        |
| <i>Amargasaurus cazaui</i>             | Non-theropod dinosaur        | 10194.61  | 7581.73   | 12807.49  | 505 | 388 | MACN-N 15    | Benson et al. (2017), #20  | 26.04  | 0.31 | 84     | MACN-N 15        | CT                             | Paulina C        |
| <i>Apatosaurus</i> sp.                 | Non-theropod dinosaur        | 41268.719 | 30691.546 | 51845.891 | 845 | 640 | CM 3018      | Benson et al. (2017), #33  | 43.04  | 0.42 | 102.48 | BYU 17096        | CT                             | Balanoff         |
| <i>Apatosaurus</i> sp.                 | Non-theropod dinosaur        | 41268.719 | 30691.546 | 51845.891 | 845 | 640 | CM 3018      | Benson et al. (2017), #33  | 31.77  | 0.31 | 102.48 | BYU 17096        | CT                             | Balanoff         |
| <i>Diplodocus</i> sp.                  | Non-theropod dinosaur        | 14813.081 | 11016.488 | 18609.673 | 563 | 460 | USNM 10865   | Benson et al. (2017), #86  | 42     | 0.42 | 100    | CM 11161         | CT                             | L. M. Wit (2023) |
| <i>Diplodocus</i> sp.                  | Non-theropod dinosaur        | 14813.081 | 11016.488 | 18609.673 | 563 | 460 | USNM 10865   | Benson et al. (2017), #86  | 31     | 0.31 | 100    | CM 11161         | CT                             | L. M. Wit (2023) |
| <i>Giraffatitan brancai</i>            | Non-theropod dinosaur        | 34003.143 | 25288.137 | 42718.148 | 730 | 654 | HMN SII      | Benson et al. (2017), #107 | 130.2  | 0.42 | 310    | MB.R.2223.1      | Plasticine cast                | Janensch         |
| <i>Giraffatitan brancai</i>            | Non-theropod dinosaur        | 34003.143 | 25288.137 | 42718.148 | 730 | 654 | HMN SII      | Benson et al. (2017), #107 | 96.1   | 0.31 | 310    | MB.R.2223.1      | Plasticine cast                | Janensch         |
| <i>Euoplocephalus tutus</i>            | Non-theropod dinosaur        | 2329.632  | 1732.548  | 2926.717  | 278 | 244 | AMNH 5404    | Benson et al. (2017), #766 | 34.73  | 0.42 | 82.7   | AMNH 5337        | GDI (this study)               | Hopson           |
| <i>Euoplocephalus tutus</i>            | Non-theropod dinosaur        | 2329.632  | 1732.548  | 2926.717  | 278 | 244 | AMNH 5404    | Benson et al. (2017), #766 | 25.64  | 0.31 | 82.7   | AMNH 5337        | GDI (this study)               | Hopson           |

|                                 |                       |          |          |           |       |       |                        |                            |        |      |       |            |                     |           |
|---------------------------------|-----------------------|----------|----------|-----------|-------|-------|------------------------|----------------------------|--------|------|-------|------------|---------------------|-----------|
| <i>Kentrosaurus aethiopicus</i> | Non-theropod dinosaur | 1596.86  | 1187.585 | 2006.136  | 245   | 210   | HMN composite specimen | Benson et al. (2017), #813 | 22.092 | 0.42 | 52.6  | HMN Ki 124 | GDI (this study)    | Galton (1 |
| <i>Kentrosaurus aethiopicus</i> | Non-theropod dinosaur | 1596.86  | 1187.585 | 2006.136  | 245   | 210   | HMN composite specimen | Benson et al. (2017), #813 | 16.306 | 0.31 | 52.6  | HMN Ki 124 | GDI (this study)    | Galton (1 |
| <i>Stegosaurus ungulatus</i>    | Non-theropod dinosaur | 6953.916 | 5171.627 | 8736.205  | 425   | 352   | YPM 1853               | Benson et al. (2017), #927 | 26.964 | 0.42 | 64.2  | CM 106     | GDI (this study)    | Galton (2 |
| <i>Stegosaurus ungulatus</i>    | Non-theropod dinosaur | 6953.916 | 5171.627 | 8736.205  | 425   | 352   | YPM 1853               | Benson et al. (2017), #927 | 19.902 | 0.31 | 64.2  | CM 106     | GDI (this study)    | Galton (2 |
| <i>Protoceratops andrewsi</i>   | Non-theropod dinosaur | 82.695   | 61.5     | 103.889   | 93    | 62    | AMNH 6424              | Benson et al. (2017), #892 | 12.6   | 0.42 | 30    | AMNH 6466  | GDI (Jerison, 1973) | Brown &   |
| <i>Protoceratops andrewsi</i>   | Non-theropod dinosaur | 82.695   | 61.5     | 103.889   | 93    | 62    | AMNH 6424              | Benson et al. (2017), #892 | 9.3    | 0.31 | 30    | AMNH 6466  | GDI (Jerison, 1973) | Brown &   |
| <i>Triceratops</i> sp.          | Non-theropod dinosaur | 13274.61 | 9872.328 | 16676.893 | 493   | 490   | AMNH 5033              | Benson et al. (2017), #950 | 58.8   | 0.42 | 140   | USNM 2416  | GDI (Jerison, 1973) | Hay (190  |
| <i>Triceratops</i> sp.          | Non-theropod dinosaur | 13274.61 | 9872.328 | 16676.893 | 493   | 490   | AMNH 5033              | Benson et al. (2017), #950 | 43.4   | 0.31 | 140   | USNM 2416  | GDI (Jerison, 1973) | Hay (190  |
| <i>Edmontosaurus annectens</i>  | Non-theropod dinosaur | 6610.079 | 4915.916 | 8304.243  | 512.3 | 250.5 | AMNH 5730              | Benson et al. (2017), #757 | 126    | 0.42 | 300   | YPM 618    | GDI (Jerison, 1973) | Lull & Wr |
| <i>Edmontosaurus annectens</i>  | Non-theropod dinosaur | 6610.079 | 4915.916 | 8304.243  | 512.3 | 250.5 | AMNH 5730              | Benson et al. (2017), #757 | 93     | 0.31 | 300   | YPM 618    | GDI (Jerison, 1973) | Lull & Wr |
| <i>Hypacrosaurus altispinus</i> | Non-theropod dinosaur | 3689.151 | 2743.622 | 4634.681  | 395   | 222   | CMN 8501               | Benson et al. (2017), #800 | 85.53  | 0.31 | 275.9 | ROM 702    | CT                  | Evans et  |
| <i>Hypacrosaurus altispinus</i> | Non-theropod dinosaur | 3689.151 | 2743.622 | 4634.681  | 395   | 222   | CMN 8501               | Benson et al. (2017), #800 | 115.88 | 0.42 | 275.9 | ROM 702    | CT                  | Evans et  |
| <i>Iguanodon bemissartensis</i> | Non-theropod dinosaur | 8268.265 | 6149.108 | 10387.421 | 490   | 337.5 | RBINS R51              | Benson et al. (2017), #805 | 149.94 | 0.42 | 357   | RBINS R51  | CT                  | Lauters ( |
| <i>Iguanodon bemissartensis</i> | Non-theropod dinosaur | 8268.265 | 6149.108 | 10387.421 | 490   | 337.5 | RBINS R51              | Benson et al. (2017), #805 | 110.67 | 0.31 | 357   | RBINS R51  | CT                  | Lauters ( |

496

497

498

499

500 **Table 2:** Estimates of telencephalic neuron counts (N; excluding the olfactory system) in Mesozoic dinosaurs. Our inferences are compared with those  
501 presented by Herculano-Houzel (2022; HH) if respected species were included in both studies (see text for the rationale of our sample composition).  
502 Minimum and maximum estimates based on both avian and non-avian sauropsid regressions are provided.

| Species                              | Group                        | MBr range (g) | N (non-avian_min) | N (non-avian_max) | N (avian_min) | N (avian_max) | MBr (g), HH | N (non-avian), HH | N (avian), HH |
|--------------------------------------|------------------------------|---------------|-------------------|-------------------|---------------|---------------|-------------|-------------------|---------------|
| <i>Acrocantosaur atokensis</i>       | Non-maniraptoriform theropod | 38.05-51.55   | 133,214,329       | 162,531,415       | 568,823,512   | 707,197,873   | 191         | 311.3M            | 2,116M        |
| <i>Allosaurus fragilis</i>           | Non-maniraptoriform theropod | 30.54-41.37   | 115,336,233       | 140,718,805       | 485,812,035   | 603,992,681   | 168         | 287.8M            | 1,921M        |
| <i>Amargasaurus cazai</i>            | Non-theropod dinosaur        | 26.04-35.28   | 103,912,541       | 126,781,049       | 433,393,846   | 538,823,026   |             |                   |               |
| <i>Apatosaurus</i> sp.               | Non-theropod dinosaur        | 31.77-43.04   | 118,367,821       | 144,417,569       | 499,807,465   | 621,392,698   |             |                   |               |
| <i>Archaeopteryx lithographica</i>   | Non-avian maniraptoriform    | 1.52-1.52     | 16,163,324        | 16,163,324        | 56,526,229    | 56,526,229    | 1.47-1.76   | 15.8M-17.7M       | 54.2M-62.1M   |
| <i>Bambiraptor feinbergi</i>         | Non-avian maniraptoriform    | 14.00-14.00   | 69,204,922        | 69,204,922        | 277,742,256   | 277,742,256   | 14          | 62.9M             | 295.8M        |
| <i>Carcharodontosaurus saharicus</i> | Non-maniraptoriform theropod | 69.44-94.08   | 197,550,205       | 241,025,981       | 875,593,081   | 1,088,593,477 |             |                   |               |
| <i>Carnotaurus sastrei</i>           | Non-maniraptoriform theropod | 33.57-45.49   | 122,728,852       | 149,738,351       | 519,999,703   | 646,496,982   |             |                   |               |
| <i>Citipati osmolskae</i>            | Non-avian maniraptoriform    | 22.05-22.05   | 93,187,090        | 93,187,090        | 384,673,367   | 384,673,367   | 22.62       | 84.4M             | 424.5M        |
| <i>Diplodocus</i> sp.                | Non-theropod dinosaur        | 31.00-42.00   | 116,483,666       | 142,118,759       | 491,105,154   | 610,573,426   | 57          | 148.5M            | 851.4M        |
| <i>Edmontosaurus annectens</i>       | Non-theropod dinosaur        | 93.00-126.00  | 239,210,068       | 291,854,121       | 1,079,618,782 | 1,342,251,315 | 150         | 268.5M            | 1,764M        |
| <i>Euoplocephalus tutus</i>          | Non-theropod dinosaur        | 25.64-34.73   | 102,856,358       | 125,492,426       | 428,574,120   | 532,830,834   | 41          | 121.4M            | 664.4M        |
| <i>Giganotosaurus carolinii</i>      | Non-maniraptoriform theropod | 69.75-94.50   | 198,127,419       | 241,730,226       | 878,393,994   | 1,092,075,751 |             |                   |               |
| <i>Giraffatitan brancai</i>          | Non-theropod dinosaur        | 96.10-130.20  | 244,403,230       | 298,190,166       | 1,105,301,670 | 1,374,181,929 | 186         | 306.3M            | 2,075M        |



|                                                     |                              |               |             |             |               |               |       |        |        |
|-----------------------------------------------------|------------------------------|---------------|-------------|-------------|---------------|---------------|-------|--------|--------|
| <i>Hypacrosaurus altispinus</i>                     | Non-theropod dinosaur        | 85.53-115.88  | 226,443,950 | 276,279,513 | 1,016,710,016 | 1,264,044,148 |       |        |        |
| <i>Iguanodon bernissartensis</i>                    | Non-theropod dinosaur        | 110.67-149.94 | 268,078,950 | 327,076,310 | 1,223,031,388 | 1,520,551,064 |       |        |        |
| <i>Kentrosaurus aethiopicus</i>                     | Non-theropod dinosaur        | 16.31-22.09   | 76,473,452  | 93,303,314  | 309,828,433   | 385,198,580   | 24    | 87.5M  | 443.9M |
| <i>Khaan mckennai</i>                               | Non-avian maniraptoriform    | 8.80-8.80     | 51,057,468  | 51,057,468  | 199,095,862   | 199,095,862   | 8.83  | 47.4M  | 209.1M |
| <i>Majungasaurus crenatissimus</i>                  | Non-maniraptoriform theropod | 27.69-37.51   | 108,177,375 | 131,984,465 | 452,902,502   | 563,077,439   |       |        |        |
| <i>Ornithomimus edmontonicus</i>                    | Non-avian maniraptoriform    | 49.89-49.89   | 159,082,339 | 159,082,339 | 690,786,497   | 690,786,497   | 87.85 | 193.6M | 1,179M |
| <i>Protoceratops andrewsi</i>                       | Non-theropod dinosaur        | 9.30-12.60    | 52,939,454  | 64,590,081  | 207,143,081   | 257,533,564   | 28    | 96.1M  | 498.5M |
| <i>Shuvuuia deserti</i>                             | Non-avian maniraptoriform    | 0.78-0.78     | 10,441,072  | 10,441,072  | 35,034,828    | 35,034,828    | 0.83  | 11.2M  | 35.2M  |
| <i>Sinraptor dongi</i>                              | Non-maniraptoriform theropod | 29.45-39.90   | 112,635,163 | 137,423,299 | 473,371,729   | 588,526,094   |       |        |        |
| <i>Stegosaurus ungulatus</i>                        | Non-theropod dinosaur        | 19.90-26.96   | 87,136,573  | 106,313,117 | 357,418,565   | 444,365,684   | 22.5  | 84.1M  | 422.8M |
| <i>Tarbosaurus bataar</i>                           | Non-maniraptoriform theropod | 49.35-66.86   | 157,956,586 | 192,718,814 | 685,437,196   | 852,179,485   |       |        |        |
| <i>Triceratops sp.</i>                              | Non-theropod dinosaur        | 43.40-58.80   | 145,204,105 | 177,159,837 | 625,098,265   | 777,162,256   | 72.2  | 171.7M | 1,017M |
| <i>Troodon formosus</i>                             | Non-avian maniraptoriform    | 45.00-45.00   | 148,688,479 | 148,688,479 | 641,536,735   | 641,536,735   | 4.1   | 121.4M | 664.4M |
| <i>Tyrannosaurus rex</i> AMNH 5029                  | Non-maniraptoriform theropod | 118.35-160.34 | 280,116,860 | 341,763,457 | 1,283,275,361 | 1,595,450,236 | 343   | 445.5M | 3,289M |
| <i>Tyrannosaurus rex</i> AMNH 5117 (Morhardt, 2016) | Non-maniraptoriform theropod | 217.11-217.11 | 416,817,413 | 416,817,413 | 1,982,735,561 | 1,982,735,561 |       |        |        |
| <i>Tyrannosaurus rex</i> AMNH 5117                  | Non-maniraptoriform theropod | 97.23-131.73  | 246,277,083 | 300,476,406 | 1,114,581,594 | 1,385,719,325 |       |        |        |
| <i>Tyrannosaurus rex</i> FMNH PR 2081               | Non-maniraptoriform theropod | 128.40-173.96 | 295,481,827 | 360,509,864 | 1,360,525,267 | 1,691,492,274 | 202   | 322.2M | 2,207M |

## 504 **Phylogenetic modeling of neurological variables**

505 We used data on extant sauropsids to place brain size variables for Mesozoic  
506 dinosaurs into their phylogenetic context. To examine variations in the relative size of the  
507 brain in fossil taxa and to calculate potential neuronal scaling regimes in extinct dinosaurs,  
508 we relied on log-transformed published data on brain mass, telencephalon mass and  
509 telencephalic neuronal numbers in extant groups (see below). Allometric equations were  
510 calculated with least squares linear regressions using phylogenetic generalized least  
511 squares (PGLS) to account for phylogenetic relatedness (Garland and Ives, 2000). PGLS  
512 allows the covariance matrix to be modified to accommodate the degree to which trait  
513 evolution deviates from Brownian motion, through a measure of phylogenetic correlation,  
514 Pagel's  $\lambda$  (Pagel, 1999). PGLS and maximum likelihood estimates of  $\lambda$  were performed using  
515 the *ape* (Paradis & Schliep, 2019) and *nlme* (Pinheiro et al., 2017) packages in R.

516 To compare differences in relative brain size across groups, phylogenetically  
517 corrected ANCOVA with Tukey post hoc comparisons were performed using a modified  
518 version of the *multcomp* package (Hothorn et al., 2015). Because of the uncertainty in  
519 estimating both brain mass and body mass in Mesozoic dinosaurs, we opted to test for inter-  
520 group differences in two datasets: One with the greatest possible relative brain size i.e. the  
521 lowest body mass estimate (lower PPE) for each species and the brain mass estimated from  
522 the highest assumed endocranial fill (42%), and one with the lowest relative brain size i.e.  
523 the highest body mass estimates (upper PPE) and the lowest assumed endocranial fill  
524 (31%). Since we assumed that the brain filled 100% of the endocranial cavity in  
525 maniraptoriform theropods, inferred relative brain mass for these species was only affected  
526 by differences in the applied body mass estimates.

527 As mentioned above, an important assumption of Herculano-Houzel (2022) is that  
528 theropods in general had relative brain sizes similar to birds. However, there is notable  
529 discontinuity in relative brain size and brain morphology between maniraptoriforms and more  
530 basal non-maniraptoriform theropods (Fig. 1, Balanoff et al., 2013). Because of this, we

531 divided our sample of Mesozoic theropods into these two groups (Tabs. 1 & 2). For *T. rex*,  
532 mean values for the three available adult brain mass and corresponding body mass  
533 estimates were used. We grouped Sauropodomorpha and Ornithischia together as non-  
534 theropod dinosaurs and compared relative brain size in this group with that in the two  
535 theropod samples. PGLS models of brain mass vs. body mass with clade as a covariate  
536 were used to test if relative brain size in these groups differs significantly between them and  
537 from extant birds and/or non-avian sauropsids. Relative brain size data for 63 extant non-  
538 avian sauropsids (including lepidosaurs, crocodylians, and turtles) and 84 bird species (not  
539 including members of the large-brained clade Telluraves) were derived from Hurlburt (1996),  
540 Chentanez et al. (1983) and Roese-Miron et al. (2023) and are listed in Supplementary File  
541 2. Importantly, these sources provide brain mass estimates excluding the olfactory tracts and  
542 bulbs and thus fit our brain size estimates for Mesozoic dinosaurs.

543 To test for differences in relative brain size we built a phylogenetic tree for all 175  
544 fossil and extant species. To construct the phylogeny of bird species, we extracted 1,000  
545 fully resolved trees from birdtree.org (Jetz et al., 2012) using the Hackett et al. (2008)  
546 backbone, and built a maximum clade credibility (MCC) tree using *phangorn* (Schliep, 2011).  
547 For lepidosaurs, we followed Kverková et al. (2022) and used a recently published species  
548 level time-calibrated phylogeny (Tonini et al., 2016) and built a MCC tree the same way as  
549 we did with the bird phylogeny. For turtles and crocodylians, we used the Timetree of Life  
550 (Kumar et al., 2017). We then stitched the trees together manually, using the divergence  
551 times from the Timetree of Life. For Mesozoic dinosaurs (28 species) we use an updated  
552 version of the composite phylogeny of Benson et al. (2014, 2018). Phylogenies for fossil  
553 dinosaurs, extant non-avian sauropsids, and birds were stitched together manually using  
554 Mesquite (Maddison and Maddison, 2023). We opted to set all branch lengths to 1. This  
555 provides adequately standardized branch lengths for other phylogenetic analyses, such as  
556 independent contrasts (Garland et al., 1992).

557 Tree building procedures were the same for telencephalic neuron count regressions,  
558 but trees used here included branch lengths. We calculate regression lines between brain

559 mass and telencephalic number of neurons for extant non-telluravian birds and non-avian  
560 sauropsids. Analogous to Herculano-Houzel (2022), these regressions were then used to  
561 estimate telencephalic neuron counts in dinosaurs, applying either an avian or a reptilian  
562 scaling regime. Since our estimates are based on brain portion endocasts that exclude the  
563 olfactory system, our telencephalic neuron counts correspond to the pallium and subpallium.  
564 Data on whole brain and telencephalic neuron counts as well as on total telencephalic and  
565 brain mass (including olfactory tract and bulbs, since neuron count data excluding these  
566 structures are currently unavailable for the taxa considered here) for birds ( $n = 112$ ) were  
567 derived from Kverková et al. (2022) and Sol et al. (2022), for non-avian sauropsids ( $n = 108$ )  
568 from Kverková et al. (2022) and for mammals ( $n = 39$ ) from Herculano-Houzel et al. (2015).  
569 The dataset is included in Supplementary File 3.

570 To get a more precise estimate of the possible number of telencephalic neurons in *T.*  
571 *rex*, we also modeled scaling regimes for telencephalon mass vs. telencephalic neuron  
572 numbers in extant sauropsids (non-avian sauropsids and non-telluravian birds), using the  
573 same references listed above. We then calculated telencephalic neuron numbers in *T. rex*  
574 using the obtained scaling regimes and applying the telencephalic volumes estimated with a  
575 comparative 3D landmark approach by Morhardt (2016) (referred to as “cerebral  
576 hemispheres” therein, excluding olfactory bulbs and tracts) for specimen AMNH FR 5117.  
577 Based on the estimates of Morhardt (2016), we also comparatively assessed the mass of the  
578 telencephalon and cerebellum in *T. rex*.

579 We want to note that our neuron count estimates might be biased by the fact that we  
580 predict neuron numbers in the pallium and subpallium (telencephalon excluding the olfactory  
581 system) based on total telencephalic neuron counts (including the olfactory system) here.  
582 This is an issue that in parts also applies to Herculano-Houzel (2022) and which we cannot  
583 circumvent due to limitations of the available raw data.

584

585

## 586 Results

### 587 *Relative brain size.*

588 Overall, we do not recover an unambiguous discontinuity in relative brain size  
589 between extant non-avian sauropsids and Mesozoic dinosaurs, including large theropods  
590 like *T. rex*. However, our analyses support the assumption that grade shifts in relative brain  
591 size occurred among non-avian dinosaurs. PGLS models showed a significant difference in  
592 relative brain size (intercept) between non-maniraptoriform theropods, such as *T. rex*, and  
593 the more bird-like Maniraptoriformes, which tend to have larger brains than other dinosaurs  
594 (PGLS, max:  $F_{4,169} = 18.11$ ,  $p \leq 0.0001$ ,  $\lambda = 0.601$ ); min:  $F_{4,171} = 23.50$ ,  $p \leq 0.0001$ ,  $\lambda = 0.601$ ).  
595 Post-hoc analysis shows that both the maximum and minimum relative brain size estimates  
596 for non-maniraptoriform theropods are not significantly different from what would be  
597 expected from extant non-avian sauropsids (Tab. 3). However, both minimum and maximum  
598 relative brain size estimates for these animals are significantly smaller than what would be  
599 expected for extant birds (Tab. 3; Fig. 4). On the other hand, we found that maniraptoriforms  
600 show no significant differences in relative brain size compared to birds (Tab. 3) and only  
601 exhibited significantly larger brains than non-avian sauropsids when the maximum relative  
602 brain size was assumed (Tab. 3; Fig 4; note that some maniraptoriforms such as *Shuvuuia*  
603 *deserti* cluster with non-avian sauropsids rather than with birds). Therefore, while most of the  
604 maniraptoriform species in our dataset exhibit relative brain sizes within the spectrum of  
605 living birds and larger than those of extant non-avian sauropsids, non-maniraptoriform  
606 theropods likely showed markedly smaller relative brain sizes within the range of the latter  
607 (Fig 4a-b). Both groups of theropods exhibit significantly larger brains than the non-theropod  
608 dinosaurs of the clades Sauropodomorpha and Ornithischia (Tab. 3), data for which we pool  
609 here. However, maximum relative brain sizes in these dinosaurs is also not significantly  
610 smaller than would be expected for non-avian sauropsids of their body mass. If minimum  
611 figures are assumed, relative brain size in these animals would have been significantly  
612 smaller than in extant non-avian sauropsids (Tab. 3).

613 **Table 3:** Tukey post hoc comparisons for a phylogenetic ANCOVA testing for differences in relative  
 614 brain size between groups of fossil dinosaurs and extant sauropsids. Significant *p*-values are shown  
 615 in bold.

| <b>Minimum relative brain size</b> |                     |                                |                                  |                            |
|------------------------------------|---------------------|--------------------------------|----------------------------------|----------------------------|
|                                    | Aves                | Non-avian<br>Maniraptoriformes | Non-maniraptoriform<br>Theropoda | Non-theropod<br>Dinosauria |
| Non-avian<br>Maniraptoriformes     | 0.27                |                                |                                  |                            |
| Non-maniraptoriform<br>Theropoda   | <b>&gt; 0.00001</b> | <b>0.00012</b>                 |                                  |                            |
| Non-theropod<br>Dinosauria         | <b>&gt; 0.00001</b> | <b>&gt; 0.00001</b>            | <b>0.048</b>                     |                            |
| Non-avian<br>Sauropsida            | <b>&gt; 0.00001</b> | 0.075                          | 0.93                             | <b>0.020</b>               |
| <b>Maximum relative brain size</b> |                     |                                |                                  |                            |
|                                    | Aves                | Non-avian<br>Maniraptoriformes | Non-maniraptoriform<br>Theropoda | Non-theropod<br>Dinosauria |
| Non-Avian<br>Maniraptoriformes     | 0.73                |                                |                                  |                            |
| Non-Maniraptoriform<br>Theropoda   | <b>0.00061</b>      | <b>0.0065</b>                  |                                  |                            |
| Non-theropod<br>Dinosauria         | <b>&gt; 0.00001</b> | <b>&gt; 0.00001</b>            | <b>0.048</b>                     |                            |
| Non-avian<br>Sauropsida            | <b>&gt; 0.00001</b> | <b>0.0081</b>                  | 0.94                             | 0.61                       |

616

617 **Table 4:** Regression parameters for different models describing the scaling of neurological traits in  
618 extant non-avian sauropsids (reptiles) and non-telluravian birds. Pagel's  $\lambda$  (ranging between 0 - 1)  
619 was used to quantify the phylogenetic signal. See methods for details. SE = standard error.  
620

|                | Model                                                           | Slope (SE)    | Intercept (SE) | $\lambda$ |
|----------------|-----------------------------------------------------------------|---------------|----------------|-----------|
| Avian GLS      | $\log(\text{Tel Neurons N}) \sim \log(\text{Brain Mass})$       | 0.821 (0.043) | 17.5 (0.063)   | 0         |
| Avian PGLS     | $\text{Log}(\text{Tel Neurons N}) \sim \log(\text{Brain Mass})$ | 0.717 (0.05)  | 17.55 (0.12)   | 0.50      |
| Reptilian GLS  | $\text{Log}(\text{Tel Neurons N}) \sim \log(\text{Brain Mass})$ | 0.615 (0.03)  | 16.347 (0.06)  | 0         |
| Reptilian PGLS | $\text{Log}(\text{Tel Neurons N}) \sim \log(\text{Brain Mass})$ | 0.655 (0.03)  | 16.324 (0.17)  | 0.82      |
| Avian PGLS     | $\log(\text{Brain Mass}) \sim \log(\text{Body Mass})$           | 0.584 (0.02)  | -2.584 (0.25)  | 0.96      |
| Reptilian PGLS | $\log(\text{Brain Mass}) \sim \log(\text{Body Mass})$           | 0.56 (0.03)   | -4.077 (0.26)  | 0.70      |

621

## 622 *Numbers of neurons*

623 We re-calculated estimates for the number of forebrain neurons in fossil dinosaurs  
624 based on PGLS-derived regressions of brain size vs. number of telencephalic neurons in  
625 extant non-avian sauropsids and birds. Our neuron count estimates are listed in Table 2 and  
626 are compared to those of Herculano-Houzel (2022), whereas regression parameters are  
627 provided in Table 4 . While many of the estimates do not differ notably from one another, the  
628 differences for some taxa, especially large theropods, are striking. For *T. rex*, Herculano-  
629 Houzel (2023) provided an estimate of 300-450M forebrain neurons if modeled based on  
630 extant non-avian sauropsids, and 2-3B based on an avian regression. In contrast, we  
631 estimated a range of 245-360M neurons with a reptilian regression and ~1-2B with an avian  
632 one (Tab. 2, Fig. 5). Using the forebrain volumes estimated for *T. rex* by Morhardt (2016), we  
633 predict 133-166M telencephalic neurons in this species if applying a reptilian scaling and  
634 0.989 to 1.25B based on an avian scaling (Fig. 5).

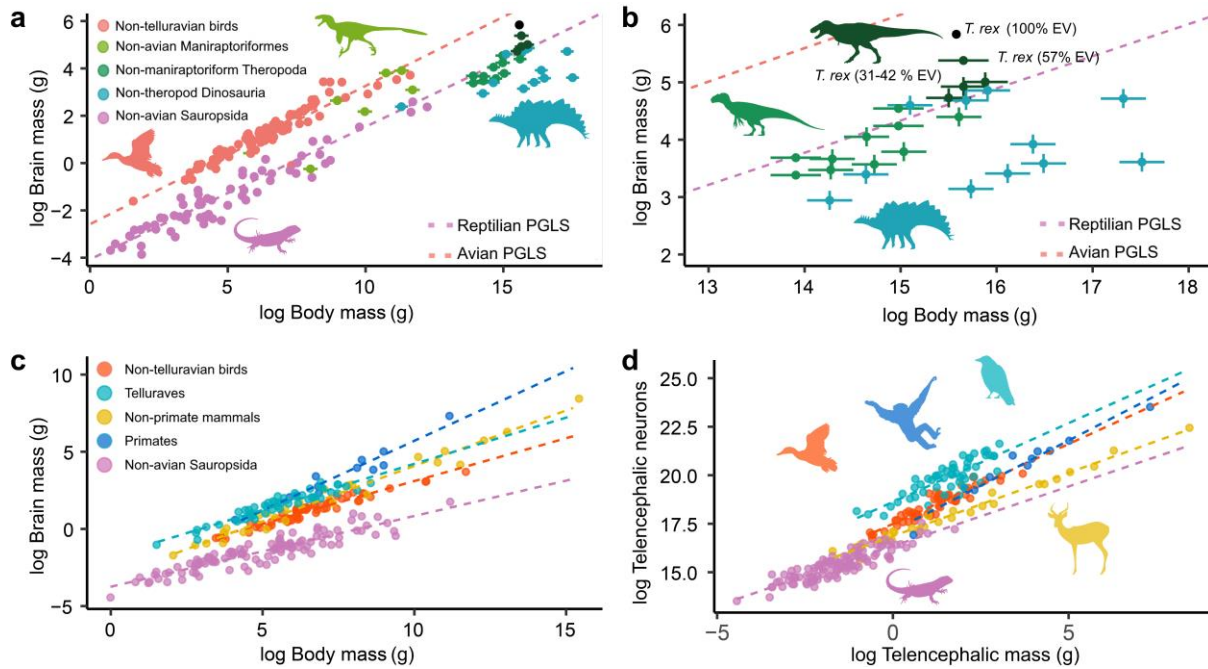

635

636 **Figure 4: Relative brain size and forebrain neuronal numbers in Mesozoic dinosaurs and other**

637 **amniotes. a.** The log-transformed mass of the brain is plotted as a function of the mass of the body for

638 extant and fossil sauropsids. In the case of fossil species, the mean body and/or brain size is shown

639 along with standard deviations. The orange dotted line represents the regression line for avian

640 species (excluding the large-brained clade Telluraves) obtained from PGLS while the pink one

641 represents the same for extant non-avian sauropsids (“reptiles” in the colloquial sense). **b.** A detail of

642 the plot shown in **a.** to illustrate the range of relative brain size in *Tyrannosaurus rex* and other

643 Mesozoic dinosaurs that we consider plausible. Besides our own brain size estimates, the plot

644 contains those from Morhardt (2016) (specimen AMNH FR 5117, endocranial fill = 57%) and Balanoff

645 et al. (2013) (specimen AMNH 5029, endocranial fill = 100%, assumed MBd = 5840 kg) **c.** Plot

646 showing log-transformed brain mass for different groups of extant amniotes plotted against body

647 mass. **d.** Plot showing log-transformed numbers of telencephalic neurons as a function of the mass of

648 the forebrain, illustrating neuronal density. Note that non-avian sauropsids and non-primate mammals

649 differ only moderately from one another here, although mammals have markedly larger brains relative

650 to body size, as shown in **c.** See methods for data sources. Silhouettes were taken from PhyloPic

651 (listed clockwise from top left): *Anas* (in public domain) *Morunasaurus* (in public domain),

652 *Dromaeosaurus* (in public domain), *Stegosaurus* (by Matt Dempsey), *Allosaurus* (by Tasman Dixon),

653 *Tyrannosaurus* (by Matt Dempsey), *Corvus* (in public domain), *Hylobates* (by Kai Caspar), *Antidorcas*

654 (by Sarah Wenig).



655

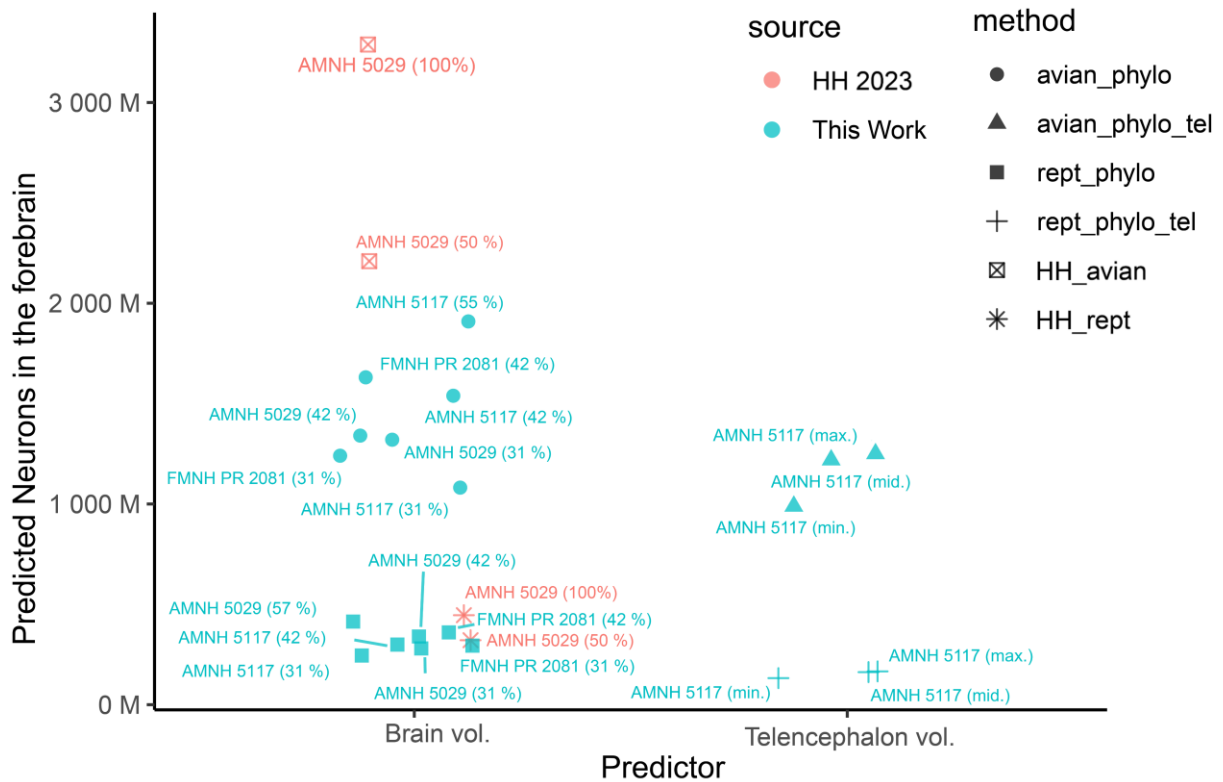

656

657

658 **Figure 5: Predicted numbers of neurons in telencephalon (excluding olfactory tracts and**  
 659 **bulbs) of *Tyrannosaurus rex*.** Points represent the estimated number of neurons in three adult  
 660 specimens of *T. rex* using different inference methods. Estimates from this study using a regression  
 661 that takes phylogenetic relationships into account (PGLS, see methods, filled circle, triangle, square  
 662 and cross) are plotted in cyan. The estimates from Herculano-Houzel (2022) based on a non-  
 663 phylogenetic regression are shown in red (crossed square, asterisk). Different underlying ratios of  
 664 brain volume:endocranial volume are annotated. On the left predicted numbers of forebrain neurons  
 665 (based on either the avian or extant non-avian sauropsids scaling regime) based on the estimated  
 666 volume of the brain portion of the endocast are shown. On the right, analogous to that, the predicted  
 667 numbers of telencephalic neurons based on volumetric estimates by Morhart (2016) is plotted.

668

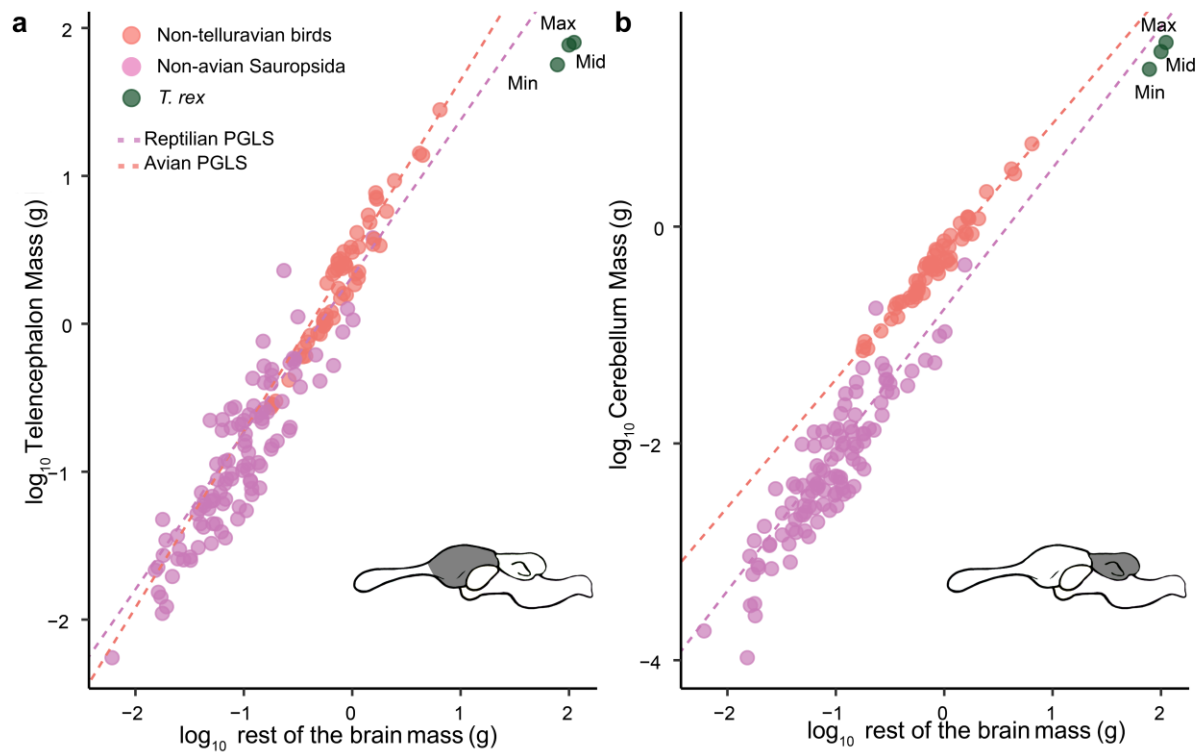

669

670 **Figure 6: Relative size of telencephalon (excluding olfactory bulb and tracts) and cerebellum in**

671 *T. rex*. **a:** The log-transformed mass of the telencephalon in extant non-telluravian birds and non-

672 avian sauropsids is plotted as a function of the mass of the rest of the brain (total brain -

673 telencephalon - cerebellum volume). Green dots show the maximum, mid and minimum estimates for

674 the mass of the *T. rex* telencephalon as estimated from digital endocasts of AMNH 5117 by Morhardt

675 (2016). The orange dotted line represents the regression line for non-telluravian bird species obtained

676 from PGLS while the pink represents the same for non-avian sauropsids. **B:** Analogous plot to **a**,

677 for the cerebellum. Note that telencephalic mass in extant species includes the olfactory bulb and

678 tracts.

## 679 Discussion of empirical results

680 We want to emphasize two aspects of our empirical findings that contrast with those

681 of Herculano-Houzel (2022). Firstly, we did not find relative brain size to separate large-

682 bodied non-maniraptoriform theropods such as *T. rex* from extant non-avian sauropsids;

683 rather, our data support a grade shift in this trait between maniraptoriform and non-

684 maniraptoriform theropods, which importantly relates to an increase in endocranial fill. As we

685 have argued beforehand, we see no support for the brains of non-maniraptoriform

686 theropods, sauropodomorphs, and most ornithischians to have filled the endocranial cavity in  
687 a bird-like fashion. However, we are aware that such a condition, or one that is at least  
688 intermediate between modern birds and crocodylians has been proposed for all of these  
689 groups at one point (e.g., Knoll & Schwarz-Wings, 2009; Morhardt, 2016; Balanoff et al.,  
690 2013; Knoll et al., 2021). Obviously, future research might still significantly change our  
691 understanding of endocranial tissue organization in Mesozoic dinosaurs and thus challenge  
692 the assumptions that we make here based on comparative evidence from adult crocodylians.  
693 Our approach suggests that relative brain size in all dinosaurs, except for the majority of  
694 maniraptoriform theropods, does not differ significantly from values present in extant non-  
695 avian reptiles. These results agree with previous conclusions (Hurlburt et al., 2013;  
696 Morhardt, 2016). Nonetheless, we want to stress that it remains unclear how meaningful the  
697 transfer of brain size scaling rules established for the given extant bird (32g – 120kg) and  
698 non-avian sauropsid (1g – 71kg) datasets to large-bodied dinosaurs actually is. Brain-body  
699 size ratios in extant cetaceans drop dramatically in taxa that evolved multi-ton body masses  
700 (Tartarelli & Bisconti, 2006), suggesting that allometric trajectories need to be accounted for.  
701 However, the restricted body mass spectrum of extant birds and reptiles as well as the  
702 limited availability of large-bodied crocodylians and turtles for neurological research hinders  
703 the compilation of such datasets for sauropsids. Furthermore, the scarcity of complete and  
704 adult dinosaur endocasts from taxa that also preserve stylopodial elements to derive body  
705 mass estimates from, limits our understanding of differences in brain size scaling between  
706 taxa. Different clades of mammals and birds have been shown to have distinct allometric  
707 relationships for relative brain size (Ksepka et al., 2020; Smaers et al., 2021). The same  
708 might have been the case in non-avian dinosaurs, biasing comparisons between the  
709 groupings we selected here. In addition to that, there might also be temporal effects on  
710 relative brain size. Such a phenomenon appears to be rampant in mammalian evolution  
711 during the Cenozoic (Bertrand et al., 2022). To our knowledge, this pattern has not been  
712 described yet in other vertebrate groups but should be considered in future studies on brain  
713 evolution in long-lived clades such as dinosaurs.

714           Secondly, our empirical findings do not support Herculano-Houzel's (2022) claim of  
715 exceptionally high telencephalic neuron counts in dinosaurs, particularly in *T. rex* and other  
716 large theropods. Instead, *T. rex* likely did not exhibit more than approximately 1.5 bn (or at a  
717 maximum 2 bn) telencephalic neurons, even when an avian neuronal density is assumed. If  
718 we assume reptilian neuronal densities, it might even have exhibited neuron numbers an  
719 order of magnitude lower than the 3.3 B suggested by Herculano-Houzel (2022). Apart from  
720 the difficulty of estimating brain mass from a dinosaurian endocast, there is one additional  
721 caveat to our neuron count estimates that needs to be acknowledged and that also applies  
722 to Herculano-Houzel's (2022) study: Telencephalic neuron numbers can only be reliably  
723 derived from total brain mass when the proportions of the studied brains are comparable.  
724 Since brain morphology in many dinosaurian lineages differs significantly from both extant  
725 birds and non-avian sauropsids (Fig. 1, Paulina-Carabajal et al., 2023), biases are thus  
726 ingrained into such estimates. Volumetric modeling of brain regions from endocasts, on  
727 which we relied here for *T. rex* exclusively, could potentially ameliorate this problem to some  
728 degree (Morhardt, 2016) but it is challenging and not yet widely used. For *T. rex*, such  
729 inferences yield lower telencephalic neuron numbers than would be hypothesized based on  
730 our total brain volume estimates, if reptilian scaling rules are applied (Fig. 5). They overlap if  
731 an avian neuron count scaling is assumed (Fig. 5).

732           We argue that there is little reason to assume that the brains of non-maniraptoriform  
733 theropods such as *T. rex* had a telencephalic neuronal density similar to that of extant birds.  
734 In living sauropsids, relative brain size is positively correlated with neural density (Kverková  
735 et al., 2022). We showed that relative brain size in non-maniraptoriform theropods did not  
736 differ significantly from that encountered in extant non-avian sauropsids. Consequently,  
737 relative brain size cannot be used as an argument to defend elevated neuron densities in  
738 these animals. The presence of endothermy in dinosaurs (see below) does also not entail  
739 avian neuronal density (contra Herculano-Houzel, 2022), as mammals exemplify. Mammals  
740 have not only evolved endothermy, but also exhibit large relative brain sizes (Fig. 4C; Tsuboi  
741 et al., 2018) and a unique multilayered cerebral neuroarchitecture (Briscoe & Ragsdale,

742 2018), yet their forebrain neuronal density is only moderately elevated compared to extant  
743 non-avian reptiles (Kverková et al., 2022). With respect to birds, it is remarkably low (at least  
744 if not considering anthropoid primates, Fig. 4D). This suggests that metabolic rate and  
745 neuronal density are not tightly coupled. Finally, the shape of the endocast and volumetric  
746 estimates of its forebrain and cerebellar portions (compare Fig. 6) suggest that the brains of  
747 *T. rex* and other large non-maniraptoriform theropods were not dissimilar to those of extant  
748 crocodylians (Rogers, 1998; Hurlburt et al., 2013; Morhardt, 2016), which reflect the  
749 plesiomorphic archosaurian condition (Fabbri & Bhullar, 2022). Given this morphological  
750 conservatism, it appears appropriate to assume reptilian neuronal densities for these  
751 animals. If we would strictly model the brains of Mesozoic dinosaurs after

752         Applying the same logic, it is tempting to speculate that the increased neuronal  
753 density that sets birds apart from other sauropsids coevolved with the marked changes in  
754 brain morphology and size that occurred in maniraptoriform theropods. If we indeed assume  
755 that an avian-like brain organization and high neuronal density emerged early within this  
756 clade's history, it is plausible that the dinosaurs with the highest neuron counts, perhaps  
757 above the extant avian range, are represented by the largest-bodied taxa within this group  
758 (for which no endocasts are currently available). These include bizarre animals such as the  
759 ornithomimosaur *Deinocheirus mirificus* (~ 7 t), the immense, scythe-clawed *Therizinosaurus*  
760 *cheloniformis* (~ 5 t) and the giant oviraptorosaur *Gigantoraptor erlianensis* (~ 2 t).

761 Alternatively, the emergence of volancy in small stem-birds similar to *Archaeopteryx* might  
762 have driven the evolution of elevated neuron densities, since active flight likely imposes  
763 constraints on skull and brain size (Olkowicz et al., 2016; Shatkovska & Ghazali, 2021).  
764 However, the lack of reliable morphological markers to infer neuron density renders all these  
765 notions speculative. Such a vagueness is inherent to predictions about the biology of extinct  
766 taxa without close living relatives and obviously needs to be acknowledged. The main  
767 argument for assuming avian neuronal densities in any group of Mesozoic dinosaurs is that  
768 the emergence of this trait within the avian stem-group cannot be reliably dated and thus  
769 might have significantly preceded the origins of crown birds. Hence, it needs to be

770 acknowledged that both a non-avian sauropsid and an avian neuron density (as well as  
771 intermediate conditions) in these animals can principally be justified, although we strongly  
772 advocate for the former, at least if taxa outside the Maniraptoriformes are concerned.  
773 Importantly, however, even if we had robust evidence for high neuron counts in Mesozoic  
774 dinosaurs, this would by no means automatically suggest exceptional cognitive capacities.

775

776 **General discussion - implications for neuron count and brain size estimates for**  
777 **vertebrate paleontology**

778 1) *Are neuron counts good predictors of cognitive performance?*

779 To infer cognitive abilities in extinct animals from neuron count estimates for the  
780 whole brain or pallium, we first need to be assured that this measure can give us meaningful  
781 insight into behaviors of extant animals. However, while there is some evidence for effects of  
782 pallial neuron counts on species-level cognitive performance in primates (Deaner 2007 - but  
783 see below) and birds (impulse inhibition - Herculano-Houzel, 2017; but see Kabadayi et al.  
784 2017 for conflicting evidence; foraging-related innovativeness – Sol et al., 2022; but consider  
785 limitations on how innovativeness is measured – Logan et al., 2018), the available data do  
786 not provide consistent support for the hypothesis (Barron & Mourmourakis, 2023). As an  
787 example, Güntürkün et al. (2017) reviewed the performance of domestic pigeons (*Columba*  
788 *livia*), corvids and anthropoid primates in a number of cognitive tasks with the aim to  
789 determine if a “cognitive hierarchy” between the three groups exists. They note that pallial  
790 neuron counts in corvids are about 2–6 times lower than in large-bodied monkeys and apes  
791 but 6–17 times higher than in pigeons. Thus, one would predict major increases in cognitive  
792 capacities from pigeons to corvids to anthropoids. Yet, corvids typically perform on par with  
793 anthropoid primates (see also Kabadayi et al. 2016 and Pika et al. 2020), and pigeons do so  
794 as well in some cognitive dimensions, such as numerical competence and short-term  
795 memory (Güntürkün et al., 2017). In addition, standardized testing of various primate species

796 suggests that small-brained lemurs with comparatively low neuronal densities (Kverková et  
797 al., 2022), monkeys and great apes rival each other in a number of cognitive dimensions  
798 (Schmitt et al., 2012; Fichtel et al., 2020). In fact, findings that report the influence of  
799 absolute brain size (and thus neuron number) on cognitive performance in primates (Deaner  
800 et al. 2007) have failed replication so far (Fichtel et al. 2020). As a final example, we want to  
801 point out large-bodied dolphin species, which have remarkably high neocortical neuron  
802 counts (*Globicephala melas* - 37 bn, *Orcinus orca* - 43 bn; Ridgway et al., 2019). Although  
803 neuron numbers in these animals vastly exceed those of humans (15-20 bn), there is no  
804 evidence that cetacean cognition is on par or even superior to that of our species (e.g.,  
805 Manger, 2013; Güntürkün, 2014). Hence, even immense differences in telencephalic neuron  
806 numbers do not necessarily create cognitive divides and their value in predicting cognitive  
807 performance is remarkably limited.

808         The case becomes even more untenable when we take more complex cognitive  
809 phenomena into consideration, such as tool use. Remarkably, Herculano-Houzel (2022)  
810 suggested that this might be within the realm of possibility for large theropods such as *T. rex*,  
811 as it is for primates and telluravian birds. However, tool use even within these groups is rare,  
812 especially if the more rigorous definition of “tooling” (requiring the deliberate management of  
813 a mechanical interface, see Frigaszy & Mangalam, 2018) is employed: this occurs in only 9  
814 avian and 20 primate genera (Colbourne et al., 2021). While it is true that telencephalon size  
815 in birds has an association with tool use (Lefebvre et al., 2002), this correlation does not hold  
816 any predictive power in the sense that all birds with a certain-sized telencephalon exhibit tool  
817 use. Even within corvids, which telencephalic neuron counts and sophisticated cognitive  
818 abilities overlap with those of anthropoid primates (Olkowicz et al., 2016; Ströckens et al.,  
819 2022), New Caledonian crows (*Corvus moneduloides*), and Hawaiian ‘alalā crows (*C.*  
820 *hawaiiensis*) are the only species known to use and manufacture tools in the wild. Notably,  
821 both species inhabit remote islands, and they share unusually straight beaks and greater  
822 binocular overlap than other crows, which are thought to be specific morphological  
823 adaptations to enable tool use (Rutz et al., 2016; Troscianko et al., 2012). A similar situation

824 can be observed in parrots. These birds display the highest avian telencephalic neuron  
825 counts (Olkowicz et al., 2016; Kverková et al., 2022; Ströckens et al., 2022), and a greatly  
826 enlarged medial spiriform nucleus, which acts as an interface between the pallium and the  
827 cerebellum, enabling enhanced motor cognition (Gutiérrez-Ibáñez et al., 2018). However,  
828 the Tanimbar corella (*Cacatua goffiniana*) is the only parrot known to be a sophisticated tool  
829 user in the wild (O'Hara et al., 2021); tellingly, the Tanimbar corella also inhabits an isolated  
830 Indonesian archipelago. Cases like these indicate that while there is a chance that a gross  
831 neuronal threshold must be met for such sophisticated vertebrate tool use to evolve (a notion  
832 we would reject since ants evolved remarkable tool use skills with brains that are small and  
833 few in neurons even for the standard of hymenopteran insects - Godfrey et al., 2021), it is  
834 highly unlikely to happen without sufficient ecological pressure, and the differences between  
835 tool using and non-tool using species are likely too subtle to detect via measurement of  
836 neuronal quantities.

837         Considering these findings, it is unsurprising that taxa converging in neuronal counts  
838 often differ markedly in cognition and behavior. Herculano-Houzel (2022) ranked her  
839 neuronal count estimates for large theropods against those of anthropoid primates, she  
840 might as well have done so for giraffes (1.7 bn neurons), which exceed tool-proficient  
841 capuchins (1.1 bn) and corvids (0.4-1.2 bn) in telencephalic neuron numbers, rivaling  
842 macaques (0.8 - 1.7 bn) (Olkowicz et al., 2016). We know little about giraffes' cognitive  
843 abilities (Caicoya et al., 2018), but it would be appropriate to be skeptical of any claim that  
844 they might exhibit "macaque-like" cognition based simply on that measure. Too many other  
845 biological traits divide these taxa, perhaps most strikingly body size. While we agree with  
846 many contemporary authors that relative brain size per se is a flawed measure of cognitive  
847 complexity (e.g., Van Schaik et al., 2021), it must not be totally ignored. This is especially  
848 true if comparisons between primates and non-bird dinosaurs are drawn, since the species  
849 concerned may differ in body mass by several orders of magnitude. Contrary to the  
850 assumptions of Herculano-Houzel (2022), the size of the telencephalon and number of its  
851 neurons must be related to the dimensions of the body, because it processes sensory,



852 visceral, and motoric information, which scale with body size (Chittka & Niven, 2009; Van  
853 Schaik et al., 2021). Relative brain size and body size are thus not negligible variables in  
854 comparative cognition and need to be considered in paleoneurology. This fact is clearly  
855 reflected by the pronounced intra- as well as interspecific body size-dependent scaling of  
856 brain size in vertebrates (Tsuboi et al., 2018; Ksepka et al., 2020; Van Schaik et al., 2021;  
857 Bertrand et al., 2022), which can hardly be explained otherwise.

858         The confounding factor of body size on neurological measures might be mitigated by  
859 calculating clade-specific portions of telencephalic mass dedicated to somatic functions  
860 based on intraspecific variation (Triki et al., 2021; Van Schaik et al., 2021) or by focusing on  
861 neuron counts in brain regions that are evidently not involved in somatic processing  
862 (Herculano-Houzel, 2017; Logan et al., 2018). In fact, a number of studies, particularly in  
863 birds, were able to associate intraspecific differences in certain cognitive dimensions to  
864 localized neurological variation, making this approach a promising one (discussed by Logan  
865 et al., 2018). At the same time however, the great intra- and interspecific heterogeneity in  
866 brain tissue architecture and neurochemistry enormously complicates any interspecific  
867 extrapolations (Logan et al., 2018; Barron & Mourmourakis, 2023). Thus, researchers cannot  
868 translate these findings to extinct species with any tolerable degree of certainty. This issue is  
869 of special relevance when comparing sauropsids with mammals. The mammalian forebrain  
870 exhibits a layered cortex but the pallium of extant sauropsids (and thus likely Mesozoic  
871 dinosaurs) is largely nuclear in organization. As the forebrain increases in size and neuron  
872 counts, a cortical organization can reduce axon length (and therefore processing time and  
873 energetic demands) by folding and bringing adjacent areas closer together, something that is  
874 impossible in a nuclear organization (see Reiner, 2023 for an extensive review).

875         Neuron counts corresponding to major brain regions, whether empirically determined  
876 or estimated, dramatically simplify neuronal tissue complexity, as do measures such as  
877 absolute brain size or EQ. Based on current evidence, they also represent flawed cognitive  
878 proxies that need to be viewed in the broader context of an animal's ecology, neuroanatomy,

879 connectomics, and neurochemistry (Fields & Stevens-Graham, 2002; Eyal et al., 2016;  
880 Logan et al., 2018; Barron & Mourmourakis, 2023, Reiner, 2023). All in all, we want to  
881 discourage attempts to predict cognitive performance in extinct species based on endocast-  
882 derived neuron count estimates.

## 883 2) *Inferring metabolic rate*

884 Apart from inferences about cognition, Herculano-Houzel (2022) claims that relative  
885 brain size should be established as a new thermobiological indicator in vertebrate  
886 palaeontology: Relatively large brains, as inferred for theropods, should be viewed as  
887 indicators of endothermy, while smaller ones, as are found in pterosaurs, sauropodomorphs  
888 and many ornithischians, would indicate ectothermy. Whereas overall brain size in  
889 vertebrates is indeed correlated with metabolic rate (e.g., Yu et al., 2014 - but also note the  
890 extreme variability within ecto- as well as endothermic groups), Herculano-Houzel's (2022)  
891 approach simplifies the matter and ignores a vast body of already available evidence on  
892 dinosaur thermobiology. First, as we have extensively discussed here, relative brain size in  
893 large theropods was markedly smaller than suggested by Herculano-Houzel (2022),  
894 rendering all conclusions made for this group untenable. Second, it is important to point out  
895 that there is a spectrum of metabolic rates in vertebrates (Legendre & Davesne, 2020) rather  
896 than a dichotomy, as suggested by Herculano-Houzel (2022).

897 Where exactly certain ornithodiran taxa align within this spectrum continues to be  
898 debated, but there is consensus that dinosaurs and pterosaurs, despite their in parts  
899 iconically small brains, had metabolic rates well above the range of extant ectothermic  
900 sauropsids (see references below). Rather than emerging with theropods, contemporary  
901 evidence suggests that endothermy evolved in the ornithodiran stem-lineage or even earlier  
902 (Legendre et al., 2016; Grigg et al., 2022) and hence was inherited by pterosaurs and  
903 dinosaurs. The extensive data supporting the presence of endothermy across Ornithodira  
904 has recently been reviewed by Grigg et al. (2022) and includes the presence of hair-like,  
905 sometimes branched, integumentary structures (Benton et al., 2019; Campione et al., 2020),

906 the efficiency of the ornithodiran respiratory system (Wedel, 2006; Butler et al., 2009;  
907 Aureliano et al., 2022; Wang et al., 2023), bone histology and high skeletal growth rates (de  
908 Ricqlès et al., 2000; Padian et al. 2004; Prondvai et al., 2012; Redelstroff et al. 2013;  
909 Legendre et al., 2016), paleoenvironmental data (Druckenmiller et al., 2021), models of  
910 locomotor costs (Pontzer et al., 2009) and geochemically-derived thermometry (Barrick et  
911 al., 1996; Dawson et al. 2020; Wiemann et al., 2022). Nevertheless, osteohistological  
912 evidence suggests that both theropod and non-theropod ornithodiran taxa varied in their  
913 growth and associated metabolic rates (Jenkins et al., 2001; Erickson et al., 2009;  
914 Redelstroff et al. 2013; D’Emic et al., 2023) and a secondary reduction of metabolic rate in  
915 some ornithischian groups is plausible (Padian et al., 2004; Redelstroff and Sander, 2009;  
916 Wiemann et al., 2022), albeit still compatible with an endothermic physiology (Grigg et al.,  
917 2022). Overall, we emphasize the need for a nuanced perspective on this trait; we cannot  
918 simply rely on modern birds and squamates as analogs.

919 The assumption that relative brain size alone (even if inferred correctly) can  
920 outperform all the aforementioned thermophysiological predictors to infer endothermy  
921 appears at best improbable. Its utility to gauge metabolic rate across ornithodiran groups  
922 therefore remains highly doubtful and must be viewed in the framework of other, more robust  
923 lines of evidence.

### 924 3) *Inferring life history traits*

925 Finally, Herculano-Houzel (2022) suggests that neuron count estimates can be used  
926 to model life history traits in Mesozoic ornithodiran taxa. This notion is based on previous  
927 empirical work that showed an association between pallial neuron counts and selected  
928 ontogenetic variables in extant mammals and birds (Herculano-Houzel, 2019). Applied to *T.*  
929 *rex*, the respective equations predict that females reached sexual maturity at an age of 4–5  
930 years and that the longevity of the species was 42-49 years (Herculano-Houzel, 2022).

931 These calculations rest on the assumption that *T. rex* had to have 2.2 – 3.3 billion  
932 pallial neurons. As we have shown, this premise appears exceedingly unlikely. Furthermore,

933 the aforementioned life history predictions are contradicted by the fossil evidence: Sexual  
934 maturity in extinct nonavian dinosaurs can be estimated histologically by the presence of  
935 medullary bone, a tissue that forms as a calcium reservoir for egg shell production and which  
936 is also seen in female birds (Schweitzer et al., 2005; Woodward et al., 2020). The earliest  
937 estimate of sexual maturity in *T. rex*, as estimated by the presence of medullary bone, is 15  
938 years (Woodward et al., 2020; Carr, 2020). If the life history of *T. rex* was similar to extant  
939 American alligators where sexual maturity occurs in animals that attain half of adult size  
940 (which would be in line with the available fossil data - Carr, 2020), then the earliest onset of  
941 sexual maturity in *T. rex* happened in its 12th year of life. Based on these lines of evidence,  
942 Herculano-Houzel's (2022) method greatly underestimates the onset of sexual maturity by 8  
943 to 11 years. Based on the number of lines of arrested growth in its long bones, which are  
944 thought to indicate annual cessations of growth, the chronologically oldest *T. rex* sampled so  
945 far lived up to 33 years (Cullen et al., 2020). Although it is not unreasonable to assume that  
946 *T. rex* lived longer than three decades, there is yet no histological evidence to support that  
947 hypothesis. However, given that Herculano-Houzel's (2022) estimate is based on faulty  
948 premises, it should not be considered a plausible alternative.

949 In fact, if applied to species other than *T. rex*, the limitations of the aforementioned  
950 approach become even more visible. For instance, if the life history of the sauropod  
951 *Apatosaurus*, a gigantic dinosaur with an adult weight exceeding 30 tonnes, is modeled  
952 based on our own neuron count estimates derived from an avian regression and an  
953 endocranial fill of 42%, the equations suggest a longevity of only 24.5 years and an onset of  
954 sexual maturity at 2.2 years (note that assuming a non-avian sauropsid regression or smaller  
955 brain size would result in an even more fast-paced life history prediction). These figures are  
956 obviously unfeasible. We are aware that Herculano-Houzel (2022) assumes that sauropods  
957 such as *Apatosaurus* were ectothermic animals so that the given equations could not be  
958 applied to them. However, since this notion defies essentially all available evidence on the  
959 biology of sauropods (see above), we choose to ignore it here. Perhaps unsurprisingly,  
960 correlations between life history and neurology that were established from a limited number

961 of extant species of mammals and birds cannot be used to infer ontogenetic parameters  
962 across non-avian dinosaurs. We strongly discourage relying on them in palaeontological  
963 practice.

964

### 965 **Beyond endocasts: What are the limits of inference on dinosaur cognition?**

966 If neuron count estimates and other endocast-derived variables do not allow reliable  
967 predictions about the cognitive abilities of non-avian dinosaurs to be made, what other  
968 methods are available? First of all, trace fossils can provide direct evidence on how  
969 dinosaurs exploited their environment and interacted with both con- and heterospecifics  
970 (e.g., Carpenter et al. 2005; Varricchio et al. 2007; Lockley et al. 2016; Brown et al. 2021).  
971 While trace fossils can provide precise and diverse insights into dinosaur behavior, obvious  
972 limitations render perspectives gained from them extremely patchy, nonetheless.

973 One further way of inferring cognitive traits in dinosaurs is by comparatively studying  
974 relevant behavioral phenomena in living crocodylians and birds, the groups that form their  
975 extant phylogenetic bracket. While such approaches are starting to gain pace (Zeiträg et al.,  
976 2023), we are not aware that ethological research could so far identify shared physical or  
977 social cognitive skills in crocodylians and birds that have not also been found in turtles and  
978 squamates (in case comparative data is indeed available - Zeiträg et al., 2022; Font et al.,  
979 2023). Thus, the behavioral resolution of such approaches appears limited thus far.  
980 Cognitive traits found exclusively in birds or crocodylians cannot simply be extrapolated to  
981 Mesozoic dinosaurs with any degree of certainty since they might be crown group  
982 apomorphies. Whereas it might be appealing to hypothesize that cognitive patterns found  
983 among modern palaeognaths are representative for their maniraptoriform forerunners  
984 (Jensen et al., 2023; Zeiträg et al., 2023), this idea is (in most cases) not testable and should  
985 hence not be disseminated uncritically.

986 Inferences on dinosaur cognition are hindered by the fact that both extant  
987 crocodylians and birds are highly derived in their own ways: Convergently to mammals, birds

988 have not only evolved an enlarged forebrain and cerebellum, but also extensive connections  
989 between these two brain regions (Gutierrez-Ibanez et al., 2018) and descending projections  
990 from the pallium to the brainstem and/or spinal cord (Ulinski and & Margoliash, 1990; Reiner  
991 & Medina, 2000). These circuits are likely essential for enabling various avian behaviors,  
992 including tooling, but are not present in extant non avian sauropsids (Ulinski and &  
993 Margoliash 1990; Gutierrez-Ibanez et al., 2023). It remains obscure when they evolved.  
994 Crocodylians on the other hand conserve a plesiomorphic brain morphology and cerebral  
995 tissue organization (Briscoe et al., 2018; Briscoe & Ragsdale, 2018). Interestingly, the rather  
996 sparse available data suggest that they exhibit a pronounced apomorphic decrease in  
997 neuronal density (Kverková et al., 2022). They are also unusual in being secondary  
998 ectotherms (e.g., Seymour et al., 2004; Legendre et al., 2016; Botha et al., 2023). It is  
999 unclear how this might have affected their neurology and cognition. Thus, the extant  
1000 archosaurian groups leave us in a rather suboptimal position to infer cognitive traits in non-  
1001 avian dinosaurs.

1002        Obviously, even the absence of a given cognitive trait in crocodylians and basal  
1003 extant birds like palaeognaths does not refute its existence in non-avian dinosaurs,  
1004 considering the diversity and long evolutionary history of this group. In fact, a species'  
1005 ecology is typically more indicative of certain behaviors and associated cognitive  
1006 phenomena than its phylogenetic affinities. Returning to the example of tool use, tool use is  
1007 an adaptation typically found in omnivorous extractive foragers (Parker & Gibson, 1977;  
1008 Parker, 2015) and only rarely reported in predators (Shumaker et al., 2011). This is reflected  
1009 by the fact that the most common types of tooling actions that have evolved comprise  
1010 reaching, probing or pounding, usually in order to access food (Colbourne et al., 2021). It  
1011 has long been observed that tool use appears when a species is found in an uncharacteristic  
1012 niche, for which it lacks the appropriate morphological adaptations, and thus compensates  
1013 by using tools to generate a functionally equivalent behavior (Alcock, 1972; Parker & Gibson,  
1014 1977). This is likely why a number of birds that use tools are found on islands, yet the ability  
1015 appears absent in their close mainland relatives (Rutz et al., 2016). Simply put, in order for

1016 tool use to evolve, there needs to be a reason for it to evolve, and there are very few  
1017 ecological contexts where tool use is a superior adaptation to its morphological equivalent  
1018 (Hansell & Ruxton, 2008). Unfortunately, this type of extremely specific contextual  
1019 information is nearly absent in long extinct species. From its iconic tooth and jaw  
1020 morphology, one can confidently predict that a hypercarnivorous species like *T. rex* would  
1021 have no need for tools, but the problem remains that few assumptions about extinct animal  
1022 cognition are falsifiable.

1023         In sum, reconstructing cognition in dinosaurs and other fossil taxa without close living  
1024 analogs is a challenging endeavor that requires integrative approaches if we are to provide  
1025 compelling inferences (de Sousa et al., 2023). Bare neuronal count estimates might be  
1026 considered a rather minor contribution to this effort and need to be aligned with data from  
1027 comparative anatomy and neurology, ecology, trace fossils, and comparative behavioral  
1028 studies on extant animals to offer a plausible picture of cognition. While communicating such  
1029 findings, researchers should acknowledge the limitations of the presented inferences to  
1030 allow their audience to delineate between reasoned conclusions and pure speculation. In a  
1031 field such as dinosaur research - avidly followed by popular media and the public eye - such  
1032 a nuanced view appears especially warranted.

1033

## 1034 **Conclusions**

1035         The dinosaurian neuronal count and relative brain size estimates presented by  
1036 Herculano-Houzel (2022) are inaccurate due to methodological shortcomings, in particular  
1037 for *T. rex*. Accordingly, the biological inferences drawn from them are implausible. As we  
1038 show here, there is no compelling evidence that relative brain size in large-bodied theropods  
1039 differed significantly from that of extant non-avian sauropsids, and their telencephalic neuron  
1040 counts were likely not exceptional, especially for animals of their size. Furthermore, we  
1041 highlight issues associated with neuron count estimates in vertebrate paleontology and  
1042 argue against their use in reconstructing behavioral and life history variables. The latter is  
1043 especially true for animals such as non-avian dinosaurs, for which disparate neuron

1044 densities might be hypothesized based on different phylogenetic and morphological  
1045 arguments.

1046 For obvious reasons, many inferences we might make about Mesozoic dinosaur  
1047 behavior will remain limited. Nevertheless, we can justify certain predictions - to a degree -  
1048 within integrative empirical frameworks to which neuron count estimates might well be added  
1049 in the future. Before such steps can be taken, however, a substantially improved  
1050 understanding of the relationship between neuron counts and other biological variables,  
1051 especially cognitive performance, in extant animals is required.

1052

### 1053 **Institutional abbreviations**

1054 AMNH = American Museum of Natural History, New York City, New York, United States;  
1055 BMNH / NHMUK = Natural History Museum, London, UK; BSP = Bayerische  
1056 Staatssammlung für Paläontologie und Historische Geologie, Munich, Germany; BYU =  
1057 Brigham Young University, Earth Science Museum, Provo, Utah, United States; CM =  
1058 Carnegie Museum of Natural History, Pittsburgh, Pennsylvania. CMN = Canadian Museum  
1059 of Nature, Ottawa, Ontario, Canada. DINO = Dinosaur National Monument, Jensen, Utah,  
1060 United States. FIP - Florida Institute of Paleontology, Palm Beach, Florida, United States;  
1061 FMNH = Field Museum of Natural History, Chicago, Illinois, United States; HMN / MB.R. =  
1062 Museum für Naturkunde, Berlin, Germany; IGM = Mongolian Institute of Geology, Ulaan  
1063 Bator, Mongolia; IRSNB / RBINS = Institut Royal des Sciences Naturelles de Belgique,  
1064 Brussels, Belgium; IVPP = Institute of Vertebrate Paleontology and Paleoanthropology,  
1065 Beijing, China; KUVP = Kansas University Natural History Museum, Lawrence, Kansas,  
1066 United States; MACN = Museo Argentino de Ciencias Naturales "Bernardino Rivadavia",  
1067 Buenos Aires, Argentina; MPC-D = Institute of Paleontology and Geology, Mongolian  
1068 Academy of Sciences, Ulaan Bator, Mongolia; MUCPv-CH = Museo de la Universidad  
1069 Nacional del Comahue, colección del Museo Ernesto Bachmann, Villa El Chocón,  
1070 Argentina; MOR = Museum of the Rockies, Bozeman, Montana, United States; NMC =



1071 Canadian Museum of Nature, Ottawa, Canada; NCSM = North Carolina Museum of  
1072 Natural Sciences, Raleigh, North Carolina, United States; OMNH = Sam Noble Museum at  
1073 the University of Oklahoma, Norman, Oklahoma, United States; PIN = Paleontological  
1074 Institute, Russian Academy of Sciences, Moscow, Russia; ROM = Royal Ontario Museum,  
1075 Toronto, Ontario, Canada; RTMP/TMP = Royal Tyrrell Museum of Palaeontology,  
1076 Drumheller, Alberta, Canada; SGM = Ministere de l'Energie et des Mines, Rabat, Morocco;  
1077 USNM = Smithsonian National Museum of Natural History, Washington, D.C., United  
1078 States; UUVP = University of Utah, Salt Lake City, Utah, United States; YPM = Yale  
1079 Peabody Museum, New Haven Connecticut, United States.

1080

### 1081 **Acknowledgements**

1082 We want to thank David Burnham, Ariana Paulina-Carabajal, Gregory M. Erickson and  
1083 Lawrence M. Witmer for sharing valuable information on fossil specimens. Andrew N.  
1084 Iwaniuk is acknowledged for helpful discussions on the methodology and structure of the  
1085 manuscript.

1086

### 1087 **References**

1088 Alcock, J. (1972). The evolution of the use of tools by feeding animals. *Evolution*, 26(3), 464-  
1089 473.

1090

1091 Alonso, P. D., Milner, A. C., Ketcham, R. A., Cookson, M. J., & Rowe, T. B. (2004). The  
1092 avian nature of the brain and inner ear of *Archaeopteryx*. *Nature*, 430(7000), 666-669.

1093

1094 Balanoff, A. M., Bever, G. S., & Ikejiri, T. (2010). The braincase of *Apatosaurus* (Dinosauria:  
1095 Sauropoda) based on computed tomography of a new specimen with comments on variation  
1096 and evolution in sauropod neuroanatomy. *American Museum Novitates*, 2010(3677), 1-32.

1097

1098 Balanoff, A. M., Bever, G. S., Rowe, T. B., & Norell, M. A. (2013). Evolutionary origins of the  
1099 avian brain. *Nature*, 501(7465), 93-96.

1100

- 1101 Barrick, R. E., Showers, W. J., & Fischer, A. G. (1996). Comparison of thermoregulation of  
1102 four ornithischian dinosaurs and a varanid lizard from the Cretaceous Two Medicine  
1103 Formation: evidence from oxygen isotopes. *Palaaios*, 11, 295-305.  
1104
- 1105 Barron, A. B., & Mourmourakis, F. (2023). The relationship between cognition and brain size  
1106 or neuron number. *Brain, Behavior and Evolution*. <https://doi.org/10.1159/000532013>  
1107
- 1108 Bennett, S. C. (1995). A statistical study of *Rhamphorhynchus* from the Solnhofen Limestone  
1109 of Germany: year-classes of a single large species. *Journal of Paleontology*, 69(3), 569-580.  
1110
- 1111 Benton, M.J., Dhouailly, D., Jiang, B., & McNamara, M. (2019). The early origin of feathers.  
1112 *Trends in Ecology and Evolution*. 34(9), 856-869.  
1113
- 1114 Benson, R. B. J., Hunt, G., Carrano, M. T. & Campione, N. (2017). Data from: Cope's rule and  
1115 the adaptive landscape of dinosaur body size evolution. *Dryad Digital Repository*.  
1116 <https://doi.org/10.5061/dryad.1t3r4>  
1117
- 1118 Benson, R.B., Campione, N. E., Carrano, M. T., Mannion, P. D., Sullivan, C., Upchurch, P. &  
1119 Evans, D. C. (2014). Rates of dinosaur body mass evolution indicate 170 million years of  
1120 sustained ecological innovation on the avian stem lineage. *PLoS Biology*, 12(5), p.e1001853.  
1121
- 1122 Benson, R.B., Hunt, G., Carrano, M. T. & Campione, N. (2018). Cope's rule and the adaptive  
1123 landscape of dinosaur body size evolution. *Palaeontology*, 61(1), 13-48.  
1124
- 1125 Bertrand, O. C., Shelley, S. L., Williamson, T. E., Wible, J. R., Chester, S. G., Flynn, J. J., ...  
1126 & Brusatte, S. L. (2022). Brawn before brains in placental mammals after the end-Cretaceous  
1127 extinction. *Science*, 376(6588), 80-85.  
1128
- 1129 Bever, G. S., Brusatte, S. L., Carr, T. D., Xu, X., Balanoff, A. M., & Norell, M. A. (2013). The  
1130 braincase anatomy of the late Cretaceous dinosaur *Alioramus* (Theropoda:  
1131 Tyrannosauroidae). *Bulletin of the American Museum of Natural History*, 2013(376), 1-72.  
1132
- 1133 Botha, J., Weiss, B. M., Dollman, K., Barrett, P. M., Benson, R. B., & Choiniere, J. N. (2023).  
1134 Origins of slow growth on the crocodylian stem lineage. *Current Biology*, 33(19), 4261-4268.  
1135

- 1136 Briscoe, S. D., & Ragsdale, C. W. (2018). Homology, neocortex, and the evolution of  
1137 developmental mechanisms. *Science*, 362(6411), 190-193.  
1138
- 1139 Briscoe, S. D., Albertin, C. B., Rowell, J. J., & Ragsdale, C. W. (2018). Neocortical  
1140 association cell types in the forebrain of birds and alligators. *Current Biology*, 28(5), 686-696.  
1141
- 1142 Brochu, C. A. (2000). A digitally-rendered endocast for *Tyrannosaurus rex*. *Journal of*  
1143 *Vertebrate Paleontology*, 20(1), 1-6.  
1144
- 1145 Brown, C.M., Currie, P.J., & Therrien, F. (2021) Intraspecific facial bite marks in tyrannosaurids  
1146 provide insight into sexual maturity and evolution of bird-like intersexual display. *Paleobiology*  
1147 48(1), 12-43.  
1148
- 1149 Brusatte, S. L., Carr, T. D., Erickson, G. M., Bever, G. S., & Norell, M. A. (2009). A long-  
1150 snouted, multihorned tyrannosaurid from the Late Cretaceous of Mongolia. *Proceedings of the*  
1151 *National Academy of Sciences*, 106(41), 17261-17266.  
1152
- 1153 Buchholtz, E. A., & Seyfarth, E.-A. (2001.) The study of “fossil brains”: Tilly Edinger (1897–  
1154 1967) and the beginnings of paleoneurology. *BioScience*, 51(8), 674-682.  
1155
- 1156 Burnham, D. A. (2004). New information on *Bambiraptor feinbergi* (Theropoda:  
1157 Dromaeosauridae) from the Late Cretaceous of Montana. In P. J. Currie, E. B. Koppelhus, M.  
1158 A. Shugar & J. L. Wright (eds.), *Feathered dragons: studies on the transition from dinosaurs*  
1159 *to birds* (pp. 67-111). Indiana University Press, Bloomington.  
1160
- 1161 Butler, R. J., Barrett, P. M., & Gower, D. J. (2009). Postcranial skeletal pneumaticity and air-  
1162 sacs in the earliest pterosaurs. *Biology Letters*, 5(4), 557-560.  
1163
- 1164 Caicoya, Á. L., Amici, F., Ensenyat, C., & Colell, M. (2019). Object permanence in *Giraffa*  
1165 *camelopardalis*: First steps in giraffes' physical cognition. *Journal of Comparative*  
1166 *Psychology*, 133(2), 207.  
1167
- 1168 Campione, N. E. (2020) MASSTIMATE: Body Mass Estimation Equations for Vertebrates.  
1169 Available at: <https://cran.r-project.org/web/packages/MASSTIMATE/MASSTIMATE.pdf>  
1170
- 1171 Campione, N. E., & Evans, D. C. (2020). The accuracy and precision of body mass estimation  
1172 in non-avian dinosaurs. *Biological Reviews*, 95(6), 1759-1797.

- 1173 Campione, N. E., Barrett, P. M., & Evans, D. C. (2020). On the ancestry of feathers in  
1174 Mesozoic dinosaurs. In C. Foth & O. W. M. Rauhut (eds.), *The Evolution of Feathers: From*  
1175 *Their Origin to the Present* (pp. 213-243). Springer International Publishing.  
1176
- 1177 Carpenter, K., Sanders, F., McWhinney, L.A., & Wood, L. (2005). Evidence for predator-prey  
1178 relationships: examples for *Allosaurus* and *Stegosaurus*. In K. Carpenter (ed.), *The*  
1179 *Carnivorous Dinosaurs* (pp. 325-350). Indiana University Press, Bloomington.  
1180
- 1181 Carr, T. D. (2020). A high-resolution growth series of *Tyrannosaurus rex* obtained from  
1182 multiple lines of evidence. *PeerJ*, 8, e9192.  
1183
- 1184 Cerroni, M. A., & Paulina-Carabajal, A. (2019). Novel information on the endocranial  
1185 morphology of the abelisaurid theropod *Carnotaurus sastrei*. *Comptes Rendus Palevol*, 18(8),  
1186 985-995.  
1187
- 1188 Chentanez, T., Huggins, S. E., & Chentanez, V. (1983). Allometric relationships for the  
1189 Siamese crocodile, *Crocodylus siamensis*. *Journal of The Science Society of Thailand*, 9, 5–  
1190 26.  
1191
- 1192 Chittka, L., & Niven, J. (2009). Are bigger brains better?. *Current Biology*, 19(21), R995-  
1193 R1008.  
1194
- 1195 Colbourne, J. A. D., Auersperg, A. M. I., Lambert, M. L., Huber, L., & Völter, C. J. (2021).  
1196 Extending the reach of tooling theory: a neurocognitive and phylogenetic perspective. *Topics*  
1197 *in Cognitive Science*, 13(4), 548–572.  
1198
- 1199 Cullen, T. M., Canale, J. I., Apesteguía, S., Smith, N. D., Hu, D., & Makovicky, P. J. (2020).  
1200 Osteohistological analyses reveal diverse strategies of theropod dinosaur body-size evolution.  
1201 *Proceedings of the Royal Society B*, 287(1939), 20202258.  
1202
- 1203 Currie, P. J., & Zhao, X. J. (1993). A new troodontid (Dinosauria, Theropoda) braincase from  
1204 the dinosaur park formation (Campanian) of Alberta. *Canadian Journal of Earth Sciences*,  
1205 30(10), 2231-2247.  
1206
- 1207 Cuvier, G. (1812). *Recherches sur les ossemens fossiles de quadrupèdes*, Vol. 3. Deterville,  
1208 Paris.  
1209

- 1210 Dawson, R. R., Field, D. J., Hull, P. M., Zelenitsky, D. K., Therrien, F., & Affek, H. P. (2020).  
1211 Eggshell geochemistry reveals ancestral metabolic thermoregulation in Dinosauria. *Science*  
1212 *Advances*, 6(7), eaax9361.  
1213
- 1214 Deaner, R. O., Isler, K., Burkart, J., & Van Schaik, C. (2007). Overall brain size, and not  
1215 encephalization quotient, best predicts cognitive ability across non-human primates. *Brain,*  
1216 *Behavior and Evolution*, 70(2), 115-124.  
1217
- 1218 D'Emic, M. D., O'Connor, P. M., Sombathy, R. S., Cerda, I., Pascucci, T. R., Varricchio, D.,  
1219 ... & Curry Rogers, K. A. (2023). Developmental strategies underlying gigantism and  
1220 miniaturization in non-avian theropod dinosaurs. *Science*, 379(6634), 811-814.  
1221
- 1222 de Ricqlès, A., Padian, K., Horner, J.R., & Francillon-Vieillot, H. 2000. Palaeohistology of the  
1223 bones of pterosaurs (Reptilia: Archosauria): anatomy, ontogeny, and biomechanical  
1224 implications. *Zoological Journal of the Linnean Society* 129: 349-385.  
1225
- 1226 de Sousa, A. A., Beaudet, A., Calvey, T., Bardo, A., Benoit, J., Charvet, C. J., ... & Wei, Y.  
1227 (2023). From fossils to mind. *Communications Biology*, 6(1), 636.  
1228
- 1229 Druckenmiller, P. S., Erickson, G. M., Brinkman, D., Brown, C. M., & Eberle, J. J. (2021).  
1230 Nesting at extreme polar latitudes by non-avian dinosaurs. *Current Biology*, 31(16), 3469-  
1231 3478.  
1232
- 1233 Edinger T. (1929) *Die fossilen Gehirne*. J. Springer, Berlin.  
1234
- 1235 Erickson, G.M., Rauhut, O.W.M., Zhou, Z., Turner, A.H., Inouye, B.D., Hu, D., and Norell,  
1236 M.A. (2009). Was dinosaurian physiology inherited by birds? reconciling slow growth in  
1237 *Archaeopteryx*. *PLoS ONE* 4(10): e7390.  
1238
- 1239 Evans, D. C., Ridgely, R., & Witmer, L. M. (2009). Endocranial anatomy of lambeosaurine  
1240 hadrosaurids (Dinosauria: Ornithischia): a sensorineural perspective on cranial crest  
1241 function. *The Anatomical Record*, 292(9), 1315-1337.  
1242
- 1243 Eyal, G., Verhoog, M. B., Testa-Silva, G., Deitcher, Y., Lodder, J. C., Benavides-Piccione,  
1244 R., ... & Segev, I. (2016). Unique membrane properties and enhanced signal processing in  
1245 human neocortical neurons. *Elife*, 5, e16553.  
1246

- 1247 Fabbri, M., & Bhullar, B. A. S. (2022). The endocast of *Euparkeria* sheds light on the  
1248 ancestral archosaur nervous system. *Palaeontology*, 65(6), e12630.  
1249
- 1250 Fragaszy, D. M., & Mangalam, M. (2018). Tooling. *Advances in the Study of Behavior*,  
1251 2018(50), 177–241.  
1252
- 1253 Franzosa, J., & Rowe, T. (2005). Cranial endocast of the Cretaceous theropod dinosaur  
1254 *Acrocanthosaurus atokensis*. *Journal of Vertebrate Paleontology*, 25(4), 859-864.  
1255
- 1256 Fields, R. D., & Stevens-Graham, B. (2002). New insights into neuron-glia communication.  
1257 *Science*, 298(5593), 556-562.  
1258
- 1259 Font, E., García-Roa, R., Pincheira-Donoso, D., & Carazo, P. (2019). Rethinking the effects  
1260 of body size on the study of brain size evolution. *Brain Behavior and Evolution*, 93(4), 182-  
1261 195.  
1262
- 1263 Font, E., Burghardt, G. M., & Leal, M. (2023). Brains, behaviour, and cognition: multiple  
1264 misconceptions. In C. Warwick, P. C. Arena, & G. M. Burghardt (eds.), *Health and Welfare of*  
1265 *Captive Reptiles* (pp. 211-238). Springer International Publishing, Cham.  
1266
- 1267 Galton, P. M. (2001). Endocranial casts of the plated dinosaur *Stegosaurus* (Upper Jurassic,  
1268 Western USA): a complete undistorted cast and the original specimens of Othniel Charles  
1269 Marsh. In K. Carpenter (ed.), *The Armored Dinosaurs* (pp. 103–129). Indiana University  
1270 Press, Bloomington.  
1271
- 1272 Garland Jr, T., Harvey, P. H., & Ives, A. R. (1992). Procedures for the analysis of  
1273 comparative data using phylogenetically independent contrasts. *Systematic Biology*, 41(1),  
1274 18-32.  
1275
- 1276 Garland, Jr, T., & Ives, A. R. (2000). Using the past to predict the present: confidence  
1277 intervals for regression equations in phylogenetic comparative methods. *The American*  
1278 *Naturalist*, 155(3), 346-364.  
1279
- 1280 Gatesy, S. M. (1991). Hind limb scaling in birds and other theropods: implications for  
1281 terrestrial locomotion. *Journal of Morphology*, 209(1), 83-96.  
1282

1283 Giffin, E. B. (1989). Pachycephalosaur paleoneurology (Archosauria: Ornithischia). *Journal*  
1284 *of Vertebrate Paleontology*, 9(1), 67-77.

1285

1286 Gignac, P.M. & Erickson, G.M. (2017). The biomechanics behind extreme osteophagy in  
1287 *Tyrannosaurus rex*. *Scientific Reports* 7(1), 2012.

1288

1289 Godfrey, R. K., Swartzlander, M., & Gronenberg, W. (2021). Allometric analysis of brain cell  
1290 number in Hymenoptera suggests ant brains diverge from general trends. *Proceedings of*  
1291 *the Royal Society B*, 288(1947), 20210199.

1292

1293 Grigg, G., Nowack, J., Bicudo, J. E. P. W., Bal, N. C., Woodward, H. N., & Seymour, R. S.  
1294 (2022). Whole-body endothermy: ancient, homologous and widespread among the  
1295 ancestors of mammals, birds and crocodylians. *Biological Reviews*, 97(2), 766-801.

1296

1297 Güntürkün, O. (2014). Is dolphin cognition special?. *Brain, Behavior and Evolution*, 83(3),  
1298 177-180.

1299

1300 Güntürkün, O., Ströckens, F., Scarf, D., & Colombo, M. (2017). Apes, feathered apes, and  
1301 pigeons: differences and similarities. *Current Opinion in Behavioral Sciences*, 16, 35-40.

1302

1303 Gutiérrez-Ibáñez, C., Iwaniuk, A. N., & Wylie, D. R. (2018). Parrots have evolved a primate-  
1304 like telencephalic-midbrain-cerebellar circuit. *Scientific Reports*, 8(1), 1-11

1305

1306 Gutiérrez-Ibáñez, C., Kettler, L., Pilon, M.C., Carr, C.E. & Wylie, D.R., (2023). Cerebellar  
1307 inputs in the American alligator (*Alligator mississippiensis*). *Brain Behavior and Evolution*,  
1308 98(1):.44-60.

1309

1310 Hackett, S. J., Kimball, R. T., Reddy, S., Bowie, R. C. K., Braun, E. L., Braun, M. J., ... Yuri,  
1311 T. (2008). A phylogenomic study of birds reveals their evolutionary history. *Science*,  
1312 320(5884), 1763–1768.

1313

1314 Hansell, M., & Ruxton, G. (2008). Setting tool use within the context of animal construction  
1315 behaviour. *Trends in Ecology & Evolution*, 23(2), 73–78.

1316

1317 Henderson, D. M. (2023). Growth constraints set an upper limit to theropod dinosaur body  
1318 size. *The Science of Nature*, 110(1), 4.

1319

- 1320 Herculano-Houzel, S. (2011). Brains matter, bodies maybe not: the case for examining  
1321 neuron numbers irrespective of body size. *Annals of the New York Academy of Sciences*,  
1322 1225(1), 191-199.
- 1323
- 1324 Herculano-Houzel, S. (2017). Numbers of neurons as biological correlates of cognitive  
1325 capability. *Current Opinion in Behavioral Sciences*, 16(2017):1–7.
- 1326
- 1327 Herculano-Houzel, S. (2019). Longevity and sexual maturity vary across species with  
1328 number of cortical neurons, and humans are no exception. *Journal of Comparative*  
1329 *Neurology*, 527(10), 1689-1705.
- 1330
- 1331 Herculano-Houzel, S. (2022). Theropod dinosaurs had primate-like numbers of telencephalic  
1332 neurons. *Journal of Comparative Neurology*, 531(9), 962-974.
- 1333
- 1334 Herculano-Houzel, S., & Kaas, J. H. (2011). Gorilla and orangutan brains conform to the  
1335 primate cellular scaling rules: implications for human evolution. *Brain, Behavior and*  
1336 *Evolution*, 77(1), 33-44.
- 1337
- 1338 Herculano-Houzel, S., Ribeiro, P., Campos, L., Valotta da Silva, A., Torres, L. B., Catania, K.  
1339 C., & Kaas, J. H. (2011). Updated neuronal scaling rules for the brains of glires  
1340 (Rodents/Lagomorphs). *Brain, Behavior and Evolution*, 78(4), 302-314.
- 1341 Herculano-Houzel, S., Manger, P. R., & Kaas, J. H. (2014). Brain scaling in mammalian  
1342 evolution as a consequence of concerted and mosaic changes in numbers of neurons and  
1343 average neuronal cell size. *Frontiers in Neuroanatomy*, 8, 77.
- 1344
- 1345 Herculano-Houzel, S., Catania, K., Manger, P. R., & Kaas, J. H. (2015). Mammalian brains  
1346 are made of these: a dataset of the numbers and densities of neuronal and nonneuronal  
1347 cells in the brain of glires, primates, scandentia, eulipotyphlans, afrotherians and  
1348 artiodactyls, and their relationship with body mass. *Brain, behavior and evolution*, 86(3-4),  
1349 145-163.
- 1350
- 1351 Hopson, J.A. (1979). Paleoneurology. In C. Gans, R. G. Northcutt, & P. Ulinski (eds.),  
1352 *Biology of the Reptilia*, Volume 9 (pp. 39–146). Academic Press, New York.
- 1353



- 1354 Hothorn, T., Bretz, F., Westfall, P., Heiberger, R. M., Schuetzenmeister, A., & Scheibe, S.  
1355 (2015). Package “multcomp”. Available at: [https://cran.r-](https://cran.r-project.org/web/packages/multcomp/multcomp.pdf)  
1356 [project.org/web/packages/multcomp/multcomp.pdf](https://cran.r-project.org/web/packages/multcomp/multcomp.pdf)  
1357
- 1358 Hu, K., King, J. L., Romick, C. A., Dufeu, D. L., Witmer, L. M., Stubbs, T. L., ... & Benton,  
1359 M. J. (2021). Ontogenetic endocranial shape change in alligators and ostriches and  
1360 implications for the development of the non-avian dinosaur endocranium. *The Anatomical*  
1361 *Record*, 304(8), 1759-1775.  
1362
- 1363 Hurlburt, G. R. (1996). *Relative brain size in recent and fossil amniotes: determination and*  
1364 *interpretation*. PhD thesis, University of Toronto, Toronto, Canada (pp. 250).  
1365
- 1366 Hurlburt, G.R., & Waldorf, L. (2002). Endocast volume and brain mass in a size series of  
1367 alligators. *Journal of Vertebrate Paleontology*, 23, (Supplement to 3), 69A..  
1368
- 1369 Hurlburt, G. R., Ridgely, R. C., & Witmer, L. M. (2013) Relative size of brain and cerebrum in  
1370 tyrannosaurid dinosaurs: an analysis using brain-endocast quantitative relationships in  
1371 extant alligators. In J. M. Parrish, R. E. Molnar, P. J. Currie, & E. B. Koppelhus (eds.),  
1372 *Tyrannosaurid Paleobiology* (pp. 134–154). Indiana University Press, Bloomington  
1373
- 1374 Iwaniuk, A. N., & Nelson, J. E. (2002). Can endocranial volume be used as an estimate of  
1375 brain size in birds? *Canadian Journal of Zoology*, 80(1), 16-23.  
1376
- 1377 Jenkins Jr, F. A., Shubin, N. H., Gatesy, S. M., & Padian, K. E. V. I. N. (2001). A diminutive  
1378 pterosaur (Pterosauria: Eudimorphodontidae) from the Greenlandic Triassic. *Bulletin of the*  
1379 *Museum of Comparative Zoology*, 156(1), 151-170.  
1380
- 1381 Jensen, T. R., Zeiräg, C., & Osvath, M. (2023). The selfish preen: absence of allopreening in  
1382 Palaeognathae and its socio-cognitive implications. *Animal Cognition*, 26, 1467–1476.  
1383
- 1384 Jerison, H. J. (1973). *Evolution of the Brain and Intelligence*. Academic Press, New York.  
1385
- 1386 Jetz, W., Thomas, G. H., Joy, J. B., Hartmann, K., & Mooers, A. O. (2012). The global  
1387 diversity of birds in space and time. *Nature*, 491(7424), 444-448.  
1388

- 1389 Jirak, D., & Janacek, J. (2017). Volume of the crocodilian brain and endocast during  
1390 ontogeny. *PLoS ONE*, 12, 6, e0178491.
- 1391
- 1392 Kabadayi, C., Taylor, L. A., von Bayern, A. M., & Osvath, M. (2016). Ravens, New  
1393 Caledonian crows and jackdaws parallel great apes in motor self-regulation despite smaller  
1394 brains. *Royal Society Open Science*, 3(4), 160104.
- 1395
- 1396 Kabadayi, C., Krasheninnikova, A., O'Neill, L., van de Weijer, J., Osvath, M., & von Bayern,  
1397 A. M. (2017). Are parrots poor at motor self-regulation or is the cylinder task poor at  
1398 measuring it?. *Animal Cognition*, 20, 1137-1146.
- 1399
- 1400 Knoll, F., Lautenschlager, S., Kawabe, S., Martínez, G., Espílez, E., Mampel, L., & Alcalá, L.  
1401 (2021). Palaeoneurology of the early cretaceous iguanodont *Proa valdearinnensis* and its  
1402 bearing on the parallel developments of cognitive abilities in theropod and ornithopod  
1403 dinosaurs. *Journal of Comparative Neurology*, 529(18), 3922-3945.
- 1404
- 1405 Knoll, F. & Schwarz-Wings, D. (2009) Palaeoneuroanatomy of *Brachiosaurus*. *Annales de*  
1406 *Paléontologie*, 95(3), 165–175.
- 1407
- 1408 Ksepka, D. T., Balanoff, A. M., Smith, N. A., Bever, G. S., Bhullar, B. A. S., Bourdon, E., ... &  
1409 Smaers, J. B. (2020). Tempo and pattern of avian brain size evolution. *Current Biology*,  
1410 30(11), 2026-2036.
- 1411 Kumar, S., Stecher, G., Suleski, M., & Hedges, S. B. (2017). TimeTree: a resource for  
1412 timelines, timetrees, and divergence times. *Molecular Biology and Evolution*, 34(7), 1812-  
1413 1819.
- 1414
- 1415 Kverková, K., Marhounová, L., Polonyiová, A., Kocourek, M., Zhang, Y., Olkowicz, S., ... &  
1416 Němec, P. (2022). The evolution of brain neuron numbers in amniotes. *Proceedings of the*  
1417 *National Academy of Sciences*, 119(11), e2121624119.
- 1418
- 1419 Larsson, H. C., Sereno, P. C., & Wilson, J. A. (2000). Forebrain enlargement among  
1420 nonavian theropod dinosaurs. *Journal of Vertebrate Paleontology*, 20(3), 615-618.
- 1421
- 1422 Legendre, L. J., & Davesne, D. (2020). The evolution of mechanisms involved in vertebrate  
1423 endothermy. *Philosophical Transactions of the Royal Society B*, 375(1793), 20190136.
- 1424

- 1425 Legendre, L.J., Guénard, G., Botha-Brink, J., & Cubo, J. (2016). Palaeohistological evidence  
1426 for ancestral high metabolic rate in archosaurs. *Systematic Biology* 65(6): 989-996.  
1427
- 1428 Lauters, P., Coudyzer, W., Vercauteren, M., & Godefroit, P. (2012). The brain of *Iguanodon*  
1429 and *Mantellisaurus*: perspectives on ornithopod evolution. In P. Godefroit (ed.), *Bernissart*  
1430 *dinosaurs and early Cretaceous terrestrial ecosystems* (pp 213–224). Indiana University  
1431 Press, Bloomington.  
1432
- 1433 Lefebvre, L., Nicolakakis, N., & Boire, D. (2002). Tools and brains in birds. *Behaviour*,  
1434 139(7), 939–973.  
1435
- 1436 Lockley, M.G., McCrea, R.T., Buckley, L.G., Lim, J.D., Matthews, N.A., Breithaupt, B.H.,  
1437 Houck, K.J., Gierliński, G.D., Surmik, D., Kim, K.S., Xing, L., Kong, D.Y., Cart, K., Martin, J.,  
1438 & Hadden, G. (2016). Theropod courtship: large scale physical evidence of display arenas  
1439 and avian-like scrape ceremony behaviour by Cretaceous dinosaurs. *Scientific Reports*  
1440 6:18952  
1441
- 1442 Logan, C. J., Avin, S., Boogert, N., Buskell, A., Cross, F. R., Currie, A., ... & Montgomery, S.  
1443 H. (2018). Beyond brain size: Uncovering the neural correlates of behavioral and cognitive  
1444 specialization. *Comparative Cognition & Behavior Reviews*.  
1445
- 1446 Maddison, W. P. & Maddison, D. R. (2023). Mesquite: a modular system for evolutionary  
1447 analysis. Available at: <http://www.mesquiteproject.org>  
1448
- 1449 Manger, P. R. (2013). Questioning the interpretations of behavioral observations of  
1450 cetaceans: is there really support for a special intellectual status for this mammalian order?.  
1451 *Neuroscience*, 250, 664-696.  
1452
- 1453 Marsh, O. C. (1879). History and methods of palaeontological discovery. *American Journal*  
1454 *of Science*, 3(107), 323-359.  
1455
- 1456 Medina, L. & Reiner, A. (2000). Do birds possess homologues of mammalian primary visual,  
1457 somatosensory and motor cortices?. *Trends in Neurosciences*, 23(1): 1-12.  
1458
- 1459 Morhardt, A. C. (2016). *Gross anatomical brain region approximation (GABRA): assessing*  
1460 *brain size, structure, and evolution in extinct archosaurs*. PhD thesis, Ohio University, Ohio,  
1461 United States.

1462

1463 Ngwenya, A., Patzke, N., Spocter, M. A., Kruger, J. L., Dell, L. A., Chawana, R., ... &  
1464 Manger, P. R. (2013). The continuously growing central nervous system of the Nile crocodile  
1465 (*Crocodylus niloticus*). *The Anatomical Record*, 296(10), 1489-1500.

1466

1467 Ngwenya, A., Patzke, N., Manger, P. R., & Herculano-Houzel, S. (2016). Continued growth  
1468 of the central nervous system without mandatory addition of neurons in the Nile crocodile  
1469 (*Crocodylus niloticus*). *Brain Behavior and Evolution*, 87(1), 19-38.

1470

1471 O'Hara, M., Mioduszezewska, B., Mundry, R., Yohanna, Haryoko, T., Rachmatika, R.,  
1472 Prawiradilaga, D. M., Huber, L., & Auersperg, A. M. I. (2021). Wild Goffin's cockatoos flexibly  
1473 manufacture and use tool sets. *Current Biology*, 31(20), 4512-4520.e6.

1474

1475 Olkowicz, S., Kocourek, M., Lučan, R. K., Porteš, M., Fitch, W. T., Herculano-Houzel, S., &  
1476 Němec, P. (2016). Birds have primate-like numbers of neurons in the forebrain. *Proceedings*  
1477 *of the National Academy of Sciences*, 113(26), 7255-7260.

1478

1479 Osborn, H. F. (1912). Crania of *Tyrannosaurus* and *Allosaurus*. *Memoirs of the American*  
1480 *Museum of Natural History, Volume. 1, New Series*, 1, 1-30.

1481

1482 Osmólska, H. (2004). Evidence on relation of brain to endocranial cavity in oviraptorid  
1483 dinosaurs. *Acta Palaeontologica Polonica*, 49(2), 321-324.

1484

1485 Padian, K., Horner, J.R., & De Ricqlès, A. 2004. Growth in small dinosaurs and pterosaurs:  
1486 the evolution of the archosaurian growth strategies. *Journal of Vertebrate Paleontology* 24(3):  
1487 555-571.

1488

1489 Pagel, M. (1999). Inferring the historical patterns of biological evolution. *Nature*, 401(6756),  
1490 877-884.

1491 Paradis, E., & Schliep, K. (2019). ape 5.0: an environment for modern phylogenetics and  
1492 evolutionary analyses in R. *Bioinformatics*, 35(3), 526-528.

1493

1494 Parker, S. T. (2015). Re-evaluating the extractive foraging hypothesis. *New Ideas in*  
1495 *Psychology*, 37, 1–12.

1496

- 1497 Parker, S. T., & Gibson, K. R. (1977). Object manipulation, tool use and sensorimotor  
1498 intelligence as feeding adaptations in cebus monkeys and great apes. *Journal of Human*  
1499 *Evolution*, 6(7), 623–641.
- 1500
- 1501 Paulina-Carabajal, A., Bronzati, M., & Cruzado-Caballero, P. (2023) Paleoneurology of non-  
1502 avian dinosaurs: an overview. In M. T. Dozo, A. Paulina-Carabajal, T. E. Macrini, & S. Walsh  
1503 (eds.), *Paleoneurology of Amniotes : New Directions in the Study of Fossil Endocasts* (pp.  
1504 267-332). Springer International Publishing, Cham.
- 1505
- 1506 Paulina-Carabajal, A., & Canale, J. I. (2010). Cranial endocast of the carcharodontosaurid  
1507 theropod *Giganotosaurus carolinii* Coria & Salgado, 1995. *Neues Jahrbuch fur Geologie und*  
1508 *Palaontologie*, 258, 249-256.
- 1509
- 1510 Paulina-Carabajal, A., & Currie, P.J. (2012). New information on the braincase and endocast  
1511 of *Sinraptor dongi* (Theropoda: Allosauroidea): Ethmoidal region, endocranial anatomy and  
1512 pneumaticity. *Vertebrata PalAsiatica*, 50, 85–101
- 1513
- 1514 Paulina Carabajal, A., Carballido, J. L., & Currie, P. J. (2014). Braincase, neuroanatomy, and  
1515 neck posture of *Amargasaurus cazaui* (Sauropoda, Dicraeosauridae) and its implications for  
1516 understanding head posture in sauropods. *Journal of Vertebrate Paleontology*, 34(4), 870-  
1517 882.
- 1518
- 1519 Persons IV, W. S., Currie, P. J., & Erickson, G. M. (2020). An older and exceptionally large  
1520 adult specimen of *Tyrannosaurus rex*. *The Anatomical Record*, 303(4), 656-672.
- 1521
- 1522 Picasso, M. B., Tambussi, C. P., & Degrange, F. J. (2011). Virtual reconstructions of the  
1523 endocranial cavity of *Rhea americana* (Aves, Palaeognathae): postnatal anatomical  
1524 changes. *Brain Behavior and Evolution*, 76(3-4), 176-184.
- 1525
- 1526 Picasso, M. B. J. (2012). Postnatal ontogeny of the locomotor skeleton of a cursorial bird:  
1527 greater rhea. *Journal of Zoology*, 286(4), 303-311.
- 1528
- 1529 Pika, S., Sima, M. J., Blum, C. R., Herrmann, E., & Mundry, R. (2020). Ravens parallel great  
1530 apes in physical and social cognitive skills. *Scientific Reports*, 10(1), 1-19.
- 1531
- 1532 Pinheiro, J., Bates, D., DebRoy, S., Sarkar, D., Heisterkamp, S., and Van Willigen, B.  
1533 (2017). Package "nlme". Available at: <https://cran.r-project.org/web/packages/nlme/nlme.pdf>.

1534  
1535 Pontzer, H., Allen, V., & Hutchinson, J.R. (2009). Biomechanics of running indicates  
1536 endothermy in bipedal dinosaurs. *PLoS ONE* 4(12): 10.1371.  
1537  
1538 Prondvai, E., Stein, K., Ósi, A., & Sander, P. M. (2012). Life history of *Rhamphorhynchus*  
1539 inferred from bone histology and the diversity of pterosaurian growth strategies. *PLoS ONE*  
1540 7(2): e31392.  
1541  
1542 R Core Team (2022). R: A language and environment for statistical computing. R  
1543 Foundation for Statistical Computing, Vienna, Austria. Available at: [https://www.R-](https://www.R-project.org/)  
1544 [project.org/](https://www.R-project.org/).  
1545  
1546 Redelstropp, R. & Sander, P.M. (2009). Long and girdle bone histology of *Stegosaurus*:  
1547 implications for growth and life history. *Journal of Vertebrate Paleontology* 29(4): 1087-1099.  
1548  
1549 Redelstropp, R., Hübner, T.R., Chinsamy, A., & Sander, P. M. (2013). Bone histology of the  
1550 stegosaur *Kentrosaurus aethiopicus* (Ornithischia: Thyreophora) from the Upper Jurassic of  
1551 Tanzania. *Evolutionary Biology* 29(6): 933-952.  
1552  
1553 Reiner, A. (2023). Could theropod dinosaurs have evolved to a human level of intelligence?.  
1554 *Journal of Comparative Neurology*, 531(9), 975–1006.  
1555  
1556 Revell, L. J., Harmon, L. J., & Collar, D. C. (2008). Phylogenetic signal, evolutionary  
1557 process, and rate. *Systematic Biology*, 57(4), 591-601.  
1558  
1559 Roese-Miron, L., Jones, M. E. H., Ferreira, J. D., & Hsiou, A. S. (2023). Virtual endocasts of  
1560 *Clevosaurus brasiliensis* and the tuatara: Rhynchocephalian neuroanatomy and the oldest  
1561 endocranial record for Lepidosauria. *The Anatomical Record*, 1–24. [https://doi.org/10.1002/](https://doi.org/10.1002/ar.25212)  
1562 [ar.25212](https://doi.org/10.1002/ar.25212)  
1563  
1564 Ridgway, S. H., Brownson, R. H., Van Alstyne, K. R., & Hauser, R. A. (2019). Higher neuron  
1565 densities in the cerebral cortex and larger cerebellums may limit dive times of delphinids  
1566 compared to deep-diving toothed whales. *PLoS One*, 14(12), e0226206.  
1567  
1568 Rogers, S. W. (1998). Exploring dinosaur neuropaleobiology: computed tomography  
1569 scanning and analysis of an *Allosaurus fragilis* endocast. *Neuron*, 21(4), 673-679.  
1570

- 1571 Rutz, C., Klump, B. C., Komarczyk, L., Leighton, R., Kramer, J., Wischnewski, S.,  
1572 Sugasawa, S., Morrissey, M. B., James, R., St Clair, J. J. H., Switzer, R. A., & Masuda, B.  
1573 M. (2016). Discovery of species-wide tool use in the Hawaiian crow. *Nature*, 537(7620),  
1574 403–407.
- 1575
- 1576 Saveliev, S. V., & Alifanov, V. R. (2007). A new study of the brain of the predatory dinosaur  
1577 *Tarbosaurus bataar* (Theropoda, Tyrannosauridae). *Paleontological Journal*, 41(3), 281-289.
- 1578
- 1579 Sakamoto, M. (2022). Estimating bite force in extinct dinosaurs using phylogenetically  
1580 predicted physiological cross-sectional areas of jaw adductor muscles. *PeerJ*, 10: e13731.
- 1581
- 1582 Sampson, S. D. & Witmer, L. M. (2007) Craniofacial anatomy of *Majungasaurus*  
1583 *crenatissimus* (Theropoda: Abelisauridae) From the Late Cretaceous Of Madagascar,  
1584 *Journal of Vertebrate Paleontology*, 27:S2, 32-104.
- 1585
- 1586 Schliep, K., Paradis, E., de Oliveira Martins, L., Potts, A., White, T. W., Stachniss, C., &  
1587 Kendall, M. (2019). Package ‘phangorn’. Available at: [https://cran.r-project.](https://cran.r-project.org/web/packages/phangorn/phangorn.pdf)  
1588 [org/web/packages/phangorn/phangorn.pdf](https://cran.r-project.org/web/packages/phangorn/phangorn.pdf)
- 1589
- 1590 Schmitt, V., Pankau, B., & Fischer, J. (2012). Old world monkeys compare to apes in the  
1591 primate cognition test battery. *PloS one*, 7(4), e32024.
- 1592
- 1593 Schweitzer, M. H., Wittmeyer, J. L., & Horner, J. R. (2005). Gender-specific reproductive  
1594 tissue in ratites and *Tyrannosaurus rex*. *Science*, 308(5727), 1456-1460.
- 1595 Seymour, R. S., Bennett-Stamper, C. L., Johnston, S. D., Carrier, D. R., & Grigg, G. C.  
1596 (2004). Evidence for endothermic ancestors of crocodiles at the stem of archosaur evolution.  
1597 *Physiological and Biochemical Zoology*, 77(6), 1051-1067.
- 1598
- 1599 Shatkovska, O. V., & Ghazali, M. (2021). Relative skull size as one of the factors limiting  
1600 skull shape variation in passerines. *Canadian Journal of Zoology*, 99(12), 1054-1066.
- 1601
- 1602 Shumaker, R. W., Walkup, K. R., & Beck, B. B. (2011). *Animal Tool Behavior: The Use and*  
1603 *Manufacture of Tools by Animals* (revised and updated edition edition). Johns Hopkins  
1604 University Press, Baltimore.
- 1605

- 1606 Smaers, J. B., Rothman, R. S., Hudson, D. R., Balanoff, A. M., Beatty, B., Dechmann, D. K.,  
1607 ... & Safi, K. (2021). The evolution of mammalian brain size. *Science Advances*, 7(18),  
1608 eabe2101.
- 1609
- 1610 Sol, D., Olkowicz, S., Sayol, F., Kocourek, M., Zhang, Y., Marhounová, L., ... & Němec, P.  
1611 (2022). Neuron numbers link innovativeness with both absolute and relative brain size in  
1612 birds. *Nature Ecology & Evolution*, 6(9), 1381-1389.
- 1613
- 1614 Spence, R. D., Zhen, Y., White, S., Schlinger, B. A., & Day, L. B. (2009). Recovery of motor  
1615 and cognitive function after cerebellar lesions in a songbird – role of estrogens. *European*  
1616 *Journal of Neuroscience*, 29(6), 1225-1234.
- 1617
- 1618 Ströckens, F., Neves, K., Kirchem, S., Schwab, C., Herculano-Houzel, S., & Güntürkün, O.  
1619 (2022). High associative neuron numbers could drive cognitive performance in corvid  
1620 species. *Journal of Comparative Neurology*, 530(10), 1588–1605.
- 1621
- 1622 Tartarelli, G., & Bisconti, M. (2006). Trajectories and constraints in brain evolution in  
1623 primates and cetaceans. *Human Evolution*, 21, 275-287.
- 1624
- 1625 Tonini, J. F. R., Beard, K. H., Ferreira, R. B., Jetz, W., & Pyron, R. A. (2016). Fully-sampled  
1626 phylogenies of squamates reveal evolutionary patterns in threat status. *Biological*  
1627 *Conservation*, 204, 23-31.
- 1628
- 1629 Triki, Z., Aellen, M., van Schaik, C. P., & Bshary, R. (2021). Relative brain size and cognitive  
1630 equivalence in fishes. *Brain, Behavior and Evolution*, 96(3), 124-136.
- 1631
- 1632 Troscianko, J., von Bayern, A. M. P., Chappell, J., Rutz, C., & Martin, G. R. (2012). Extreme  
1633 binocular vision and a straight bill facilitate tool use in New Caledonian crows. *Nature*  
1634 *Communications*, 3(1), 1110.
- 1635
- 1636 Tsuboi, M., van der Bijl, W., Kopperud, B. T., Erritzøe, J., Voje, K. L., Kotrschal, A., ... &  
1637 Kolm, N. (2018). Breakdown of brain–body allometry and the encephalization of birds and  
1638 mammals. *Nature Ecology & Evolution*, 2(9), 1492-1500.
- 1639
- 1640 Ulinski, P. S. & Margoliash, D. (1990). Neurobiology of the reptile-bird transition. In E. G.  
1641 Jones & A. Peters (eds.), *Comparative Structure and Evolution of Cerebral Cortex, Part I*  
1642 (pp. 217-265). Springer, Boston.



1643

1644 Van Schaik, C. P., Triki, Z., Bshary, R., & Heldstab, S. A. (2021). A farewell to the  
1645 encephalization quotient: a new brain size measure for comparative primate cognition. *Brain,*  
1646 *Behavior and Evolution*, 96(1), 1-12.

1647

1648 Varricchio, D.J., Martin, A.J., Katsura, Y. (2007). First trace and body fossil evidence of a  
1649 burrowing, denning dinosaur. *Proceedings of the Royal Society B* 274:1361–1368.

1650

1651 Wang, Y., Claessens, L.P.A.M., & Sullivan, C. (2023). Deep reptilian evolutionary roots of a  
1652 major avian respiratory adaptation. *Communications Biology* 6:3.

1653

1654 Watanabe, A., Gignac, P.M., Balanoff, A.M., Green, T.L., Kley, N.J. & Norell, M.A. (2019).  
1655 Are endocasts good proxies for brain size and shape in archosaurs throughout ontogeny?.  
1656 *Journal of Anatomy*, 234, 3, 291-305.

1657

1658 Wedel, M.J. (2006). Origin of postcranial skeletal pneumaticity in dinosaurs. *Integrative*  
1659 *Zoology*, 1(2): 80-85.

1660

1661 Wiemann, J., Menéndez, I., Crawford, J. M., Fabbri, M., Gauthier, J. A., Hull, P. M., ... &  
1662 Briggs, D. E. (2022). Fossil biomolecules reveal an avian metabolism in the ancestral  
1663 dinosaur. *Nature*, 606(7914), 522-526.

1664

1665 Witmer, L. M., Chatterjee, S., Franzosa, J., & Rowe, T. (2003). Neuroanatomy of flying  
1666 reptiles and implications for flight, posture and behaviour. *Nature*, 425(6961), 950-953.

1667

1668 Witmer, L. M., Ridgely, R. C., Dufeu, D. L., & Semones, M. C. (2008). Using CT to peer into  
1669 the past: 3D visualization of the brain and ear regions of birds, crocodiles, and nonavian  
1670 dinosaurs. In H. Endo & R.Frey (eds.), *Anatomical Imaging: Towards a New Morphology*  
1671 (pp. 67–87). Springer, Tokyo.

1672

1673 Witmer, L. M., & Ridgely, R. C. (2009). New insights into the brain, braincase, and ear region  
1674 of tyrannosaurs (Dinosauria, Theropoda), with implications for sensory organization and  
1675 behavior. *The Anatomical Record*, 292(9), 1266-1296.

1676

1677 Woodward, A., C. T. Moore, & M. F. Delaney. (1991). *Experimental Alligator Harvest: Final*  
1678 *Report*. Study no. 7567. Bureau of Wildlife Research, Florida Game and Fresh Water Fish  
1679 Commission, Tallahassee, 118pp.

- 1680
- 1681 Woodward, H. N., Tremaine, K., Williams, S. A., Zanno, L. E., Horner, J. R., & Myhrvold, N.  
1682 (2020). Growing up *Tyrannosaurus rex*: Osteohistology refutes the pygmy “*Nanotyrannus*”  
1683 and supports ontogenetic niche partitioning in juvenile *Tyrannosaurus*. *Science Advances*,  
1684 6(1), eaax6250.
- 1685
- 1686 Yu, Y., Karbowski, J., Sachdev, R. N., & Feng, J. (2014). Effect of temperature and glia in  
1687 brain size enlargement and origin of allometric body-brain size scaling in vertebrates. *BMC*  
1688 *Evolutionary Biology*, 14(1), 1-14.
- 1689
- 1690 Zeiträg, C., Jensen, T. R., & Osvath, M. (2022). Gaze following: A socio-cognitive skill rooted  
1691 in deep time. *Frontiers in Psychology*, 13:950935.
- 1692
- 1693 Zeiträg, C., Reber, S. A., & Osvath, M. (2023). Gaze following in Archosauria — Alligators  
1694 and palaeognath birds suggest dinosaur origin of visual perspective taking. *Science*  
1695 *Advances*, 9(20), eadf0405.
- 1696
- 1697 Zelenitsky, D. K., Therrien, F., Ridgely, R. C., McGee, A. R., & Witmer, L. M. (2011).  
1698 Evolution of olfaction in non-avian theropod dinosaurs and birds. *Proceedings of the Royal*  
1699 *Society B: Biological Sciences*, 278(1725), 3625-3634.

1700

1701 **Supplementary Files**

1702 **Suppl. File 1:** Information on the selection and determination of brain endocasts in this  
1703 study, including comments on endocast data presented in Jerison (1973), Hopson (1979)  
1704 and Hurlburt (1996)

1705 **Suppl. File 2:** Brain and body mass data of extant sauropsid species, excluding the olfactory  
1706 tracts and bulbs. Brain mass data are derived from Hurlburt (1996), except for those of the  
1707 Siamese crocodile, which derive from Chentanez et al. (1983). All birds considered here  
1708 belong to non-telluravian taxa.

1709 **Suppl. File 3:** Neuron count data, brain size measures and respective references for extant  
1710 sauropsid and mammalian species.

1711

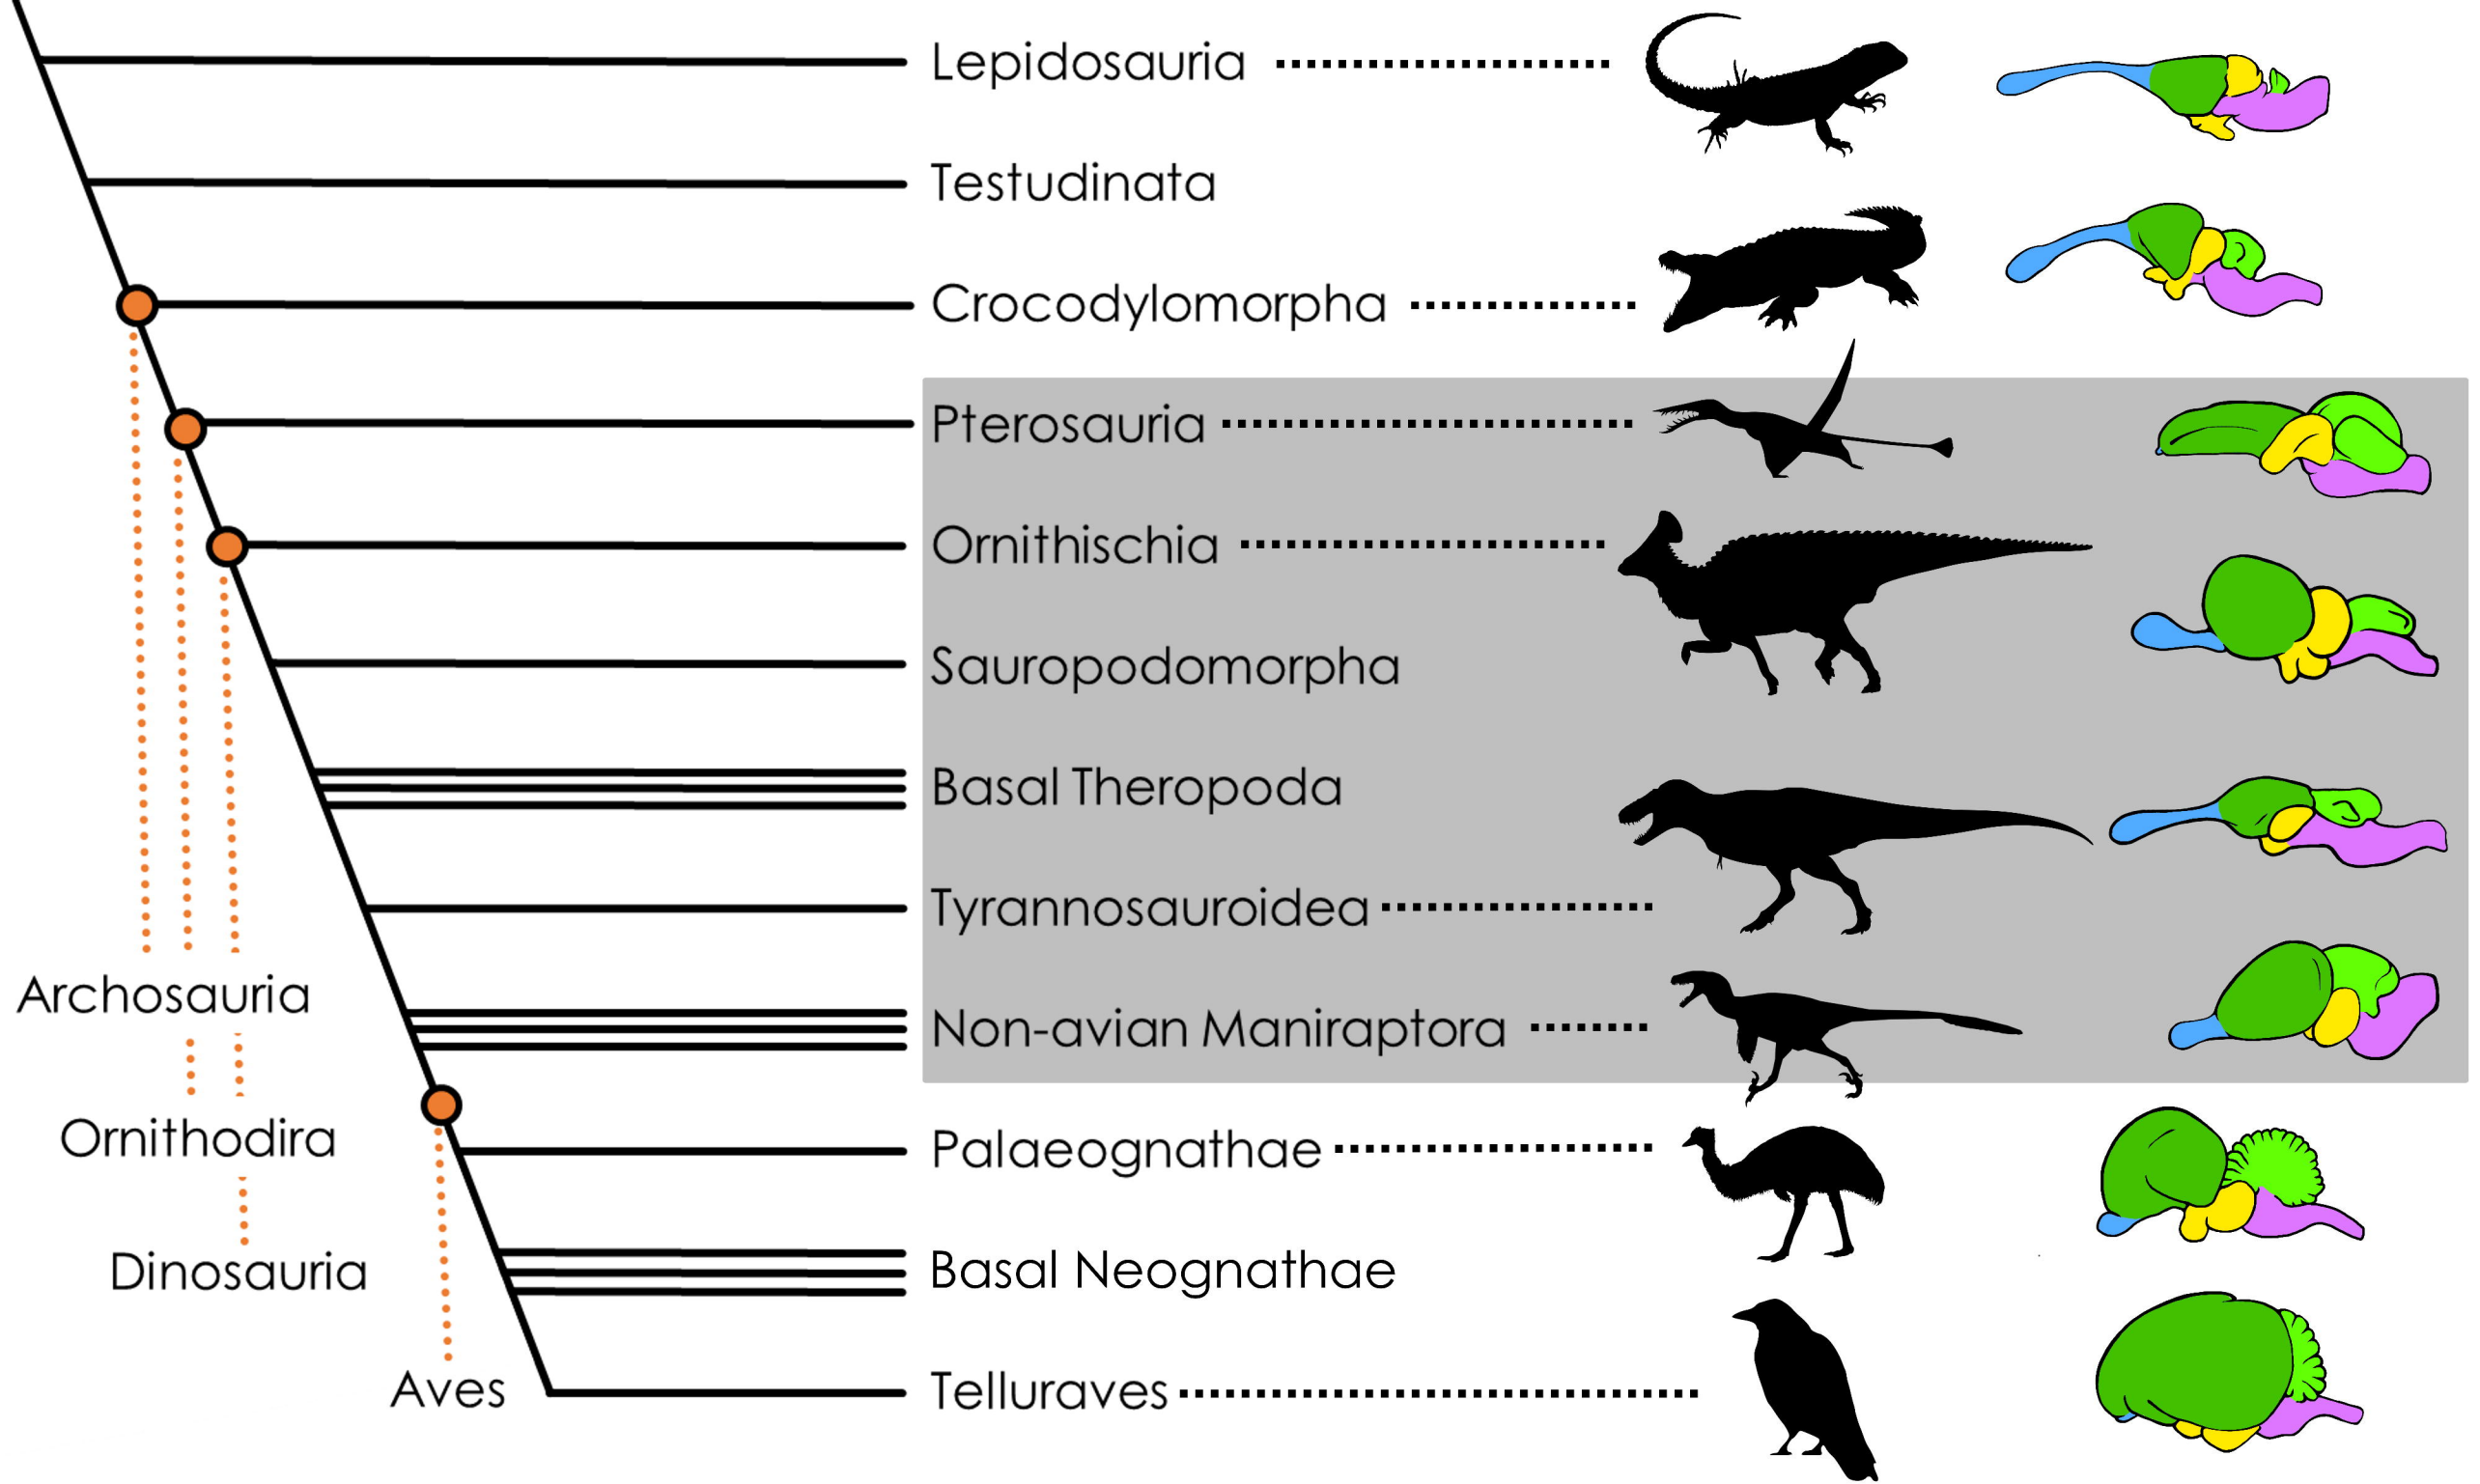

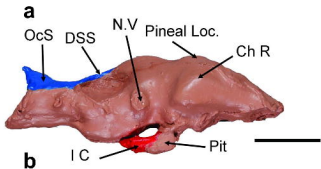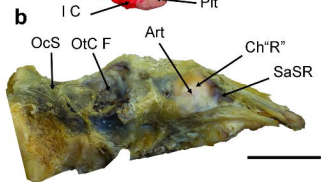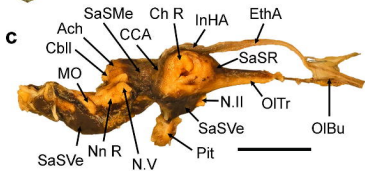

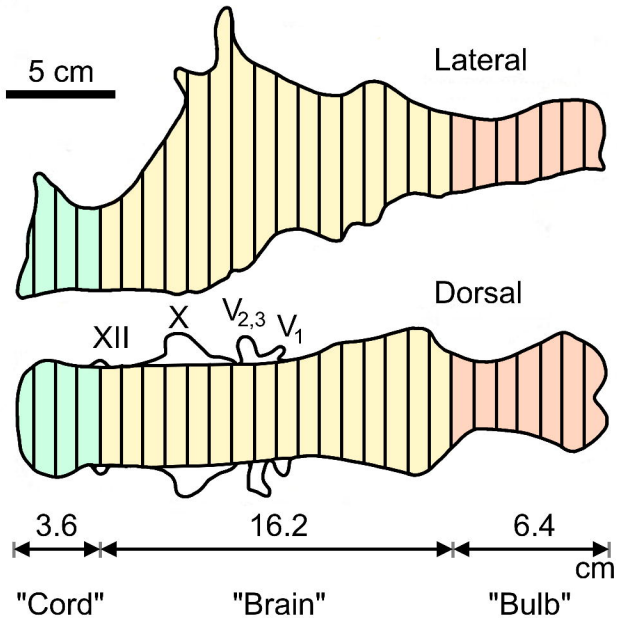

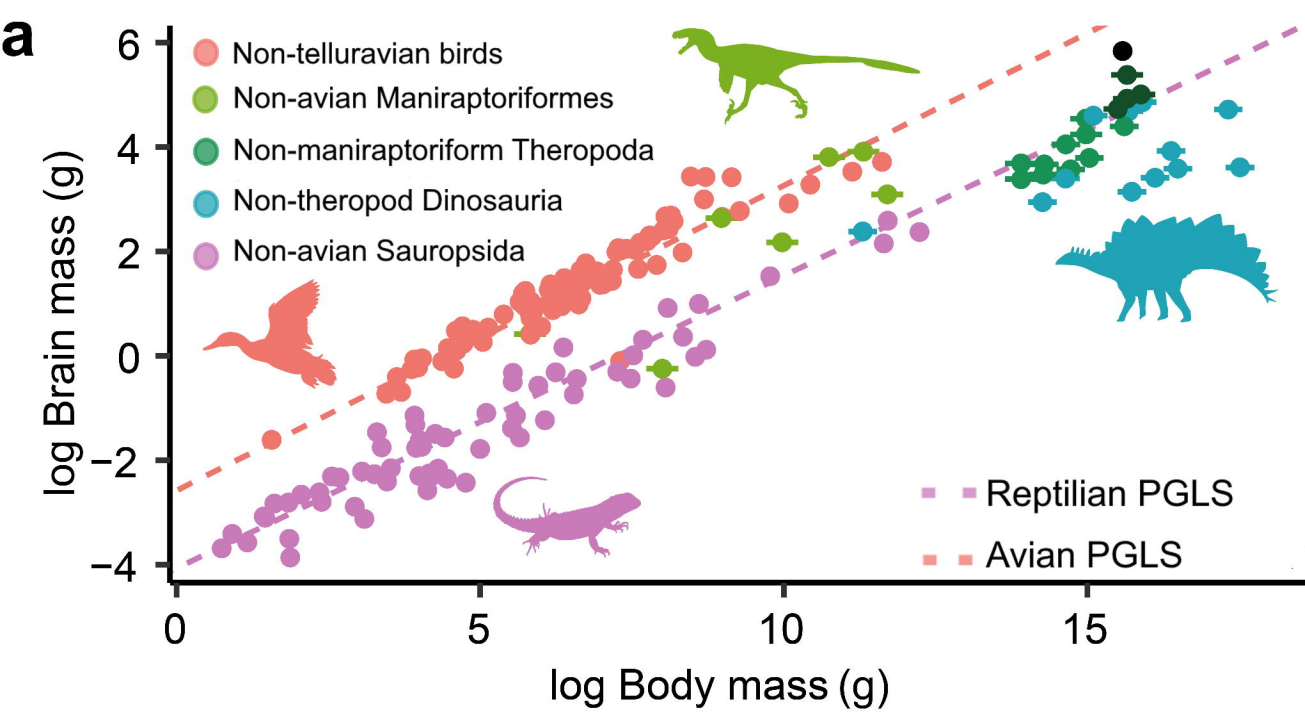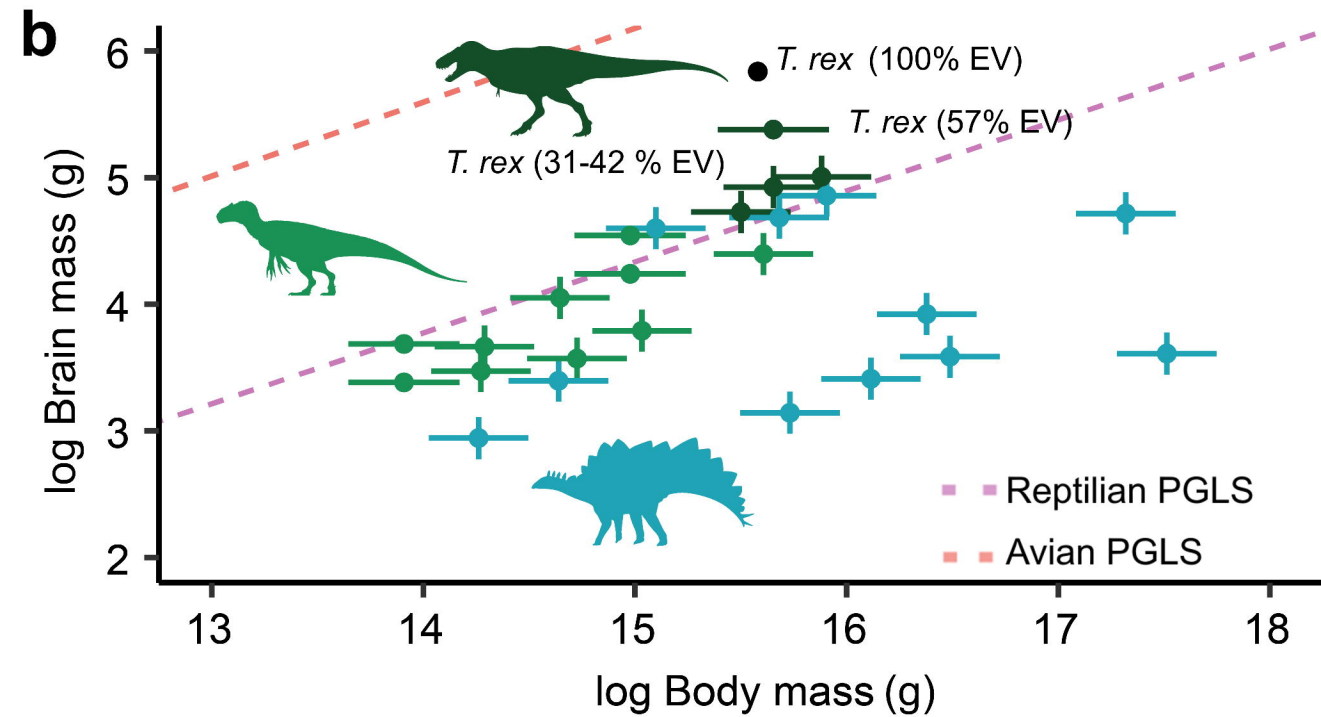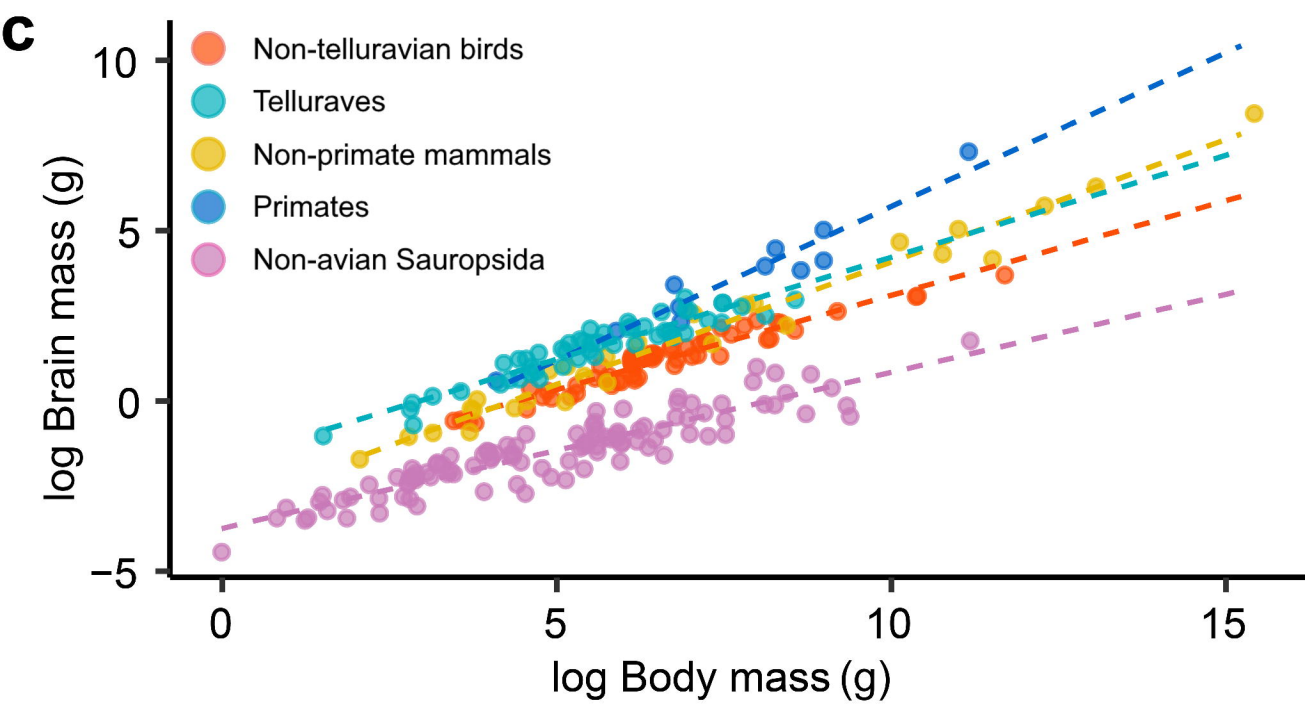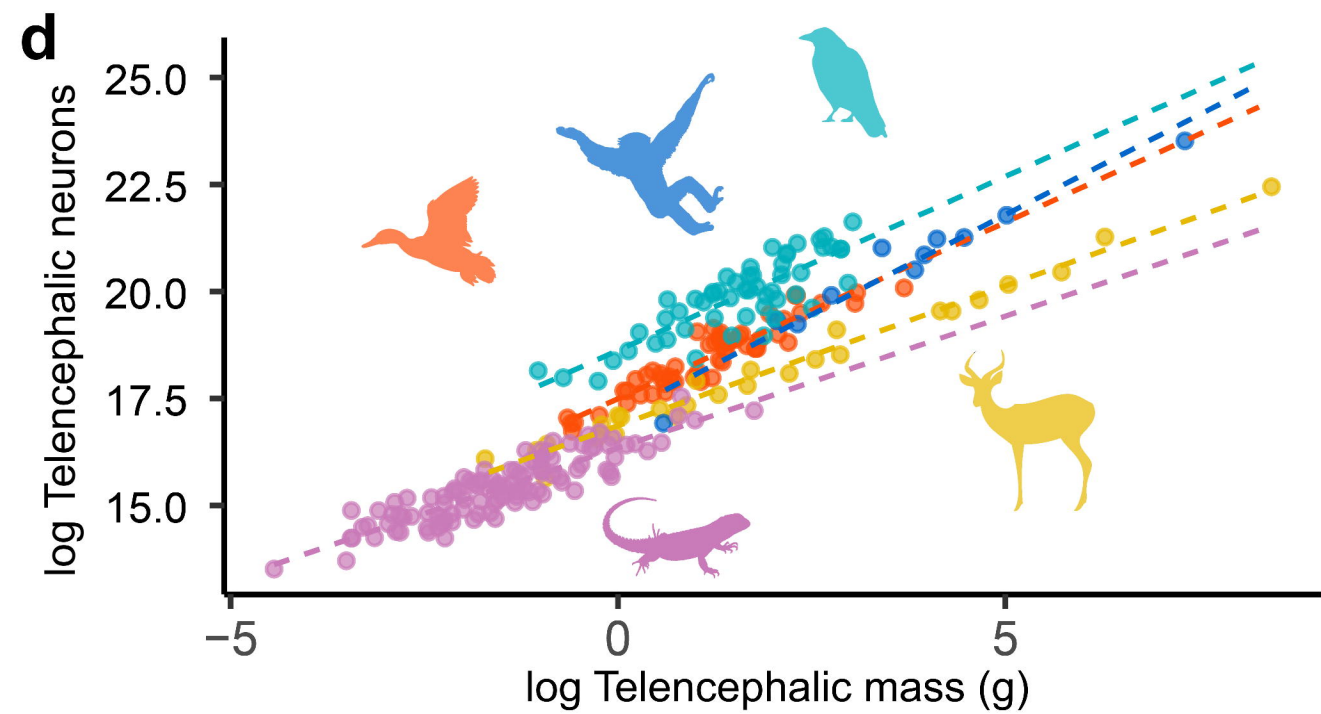

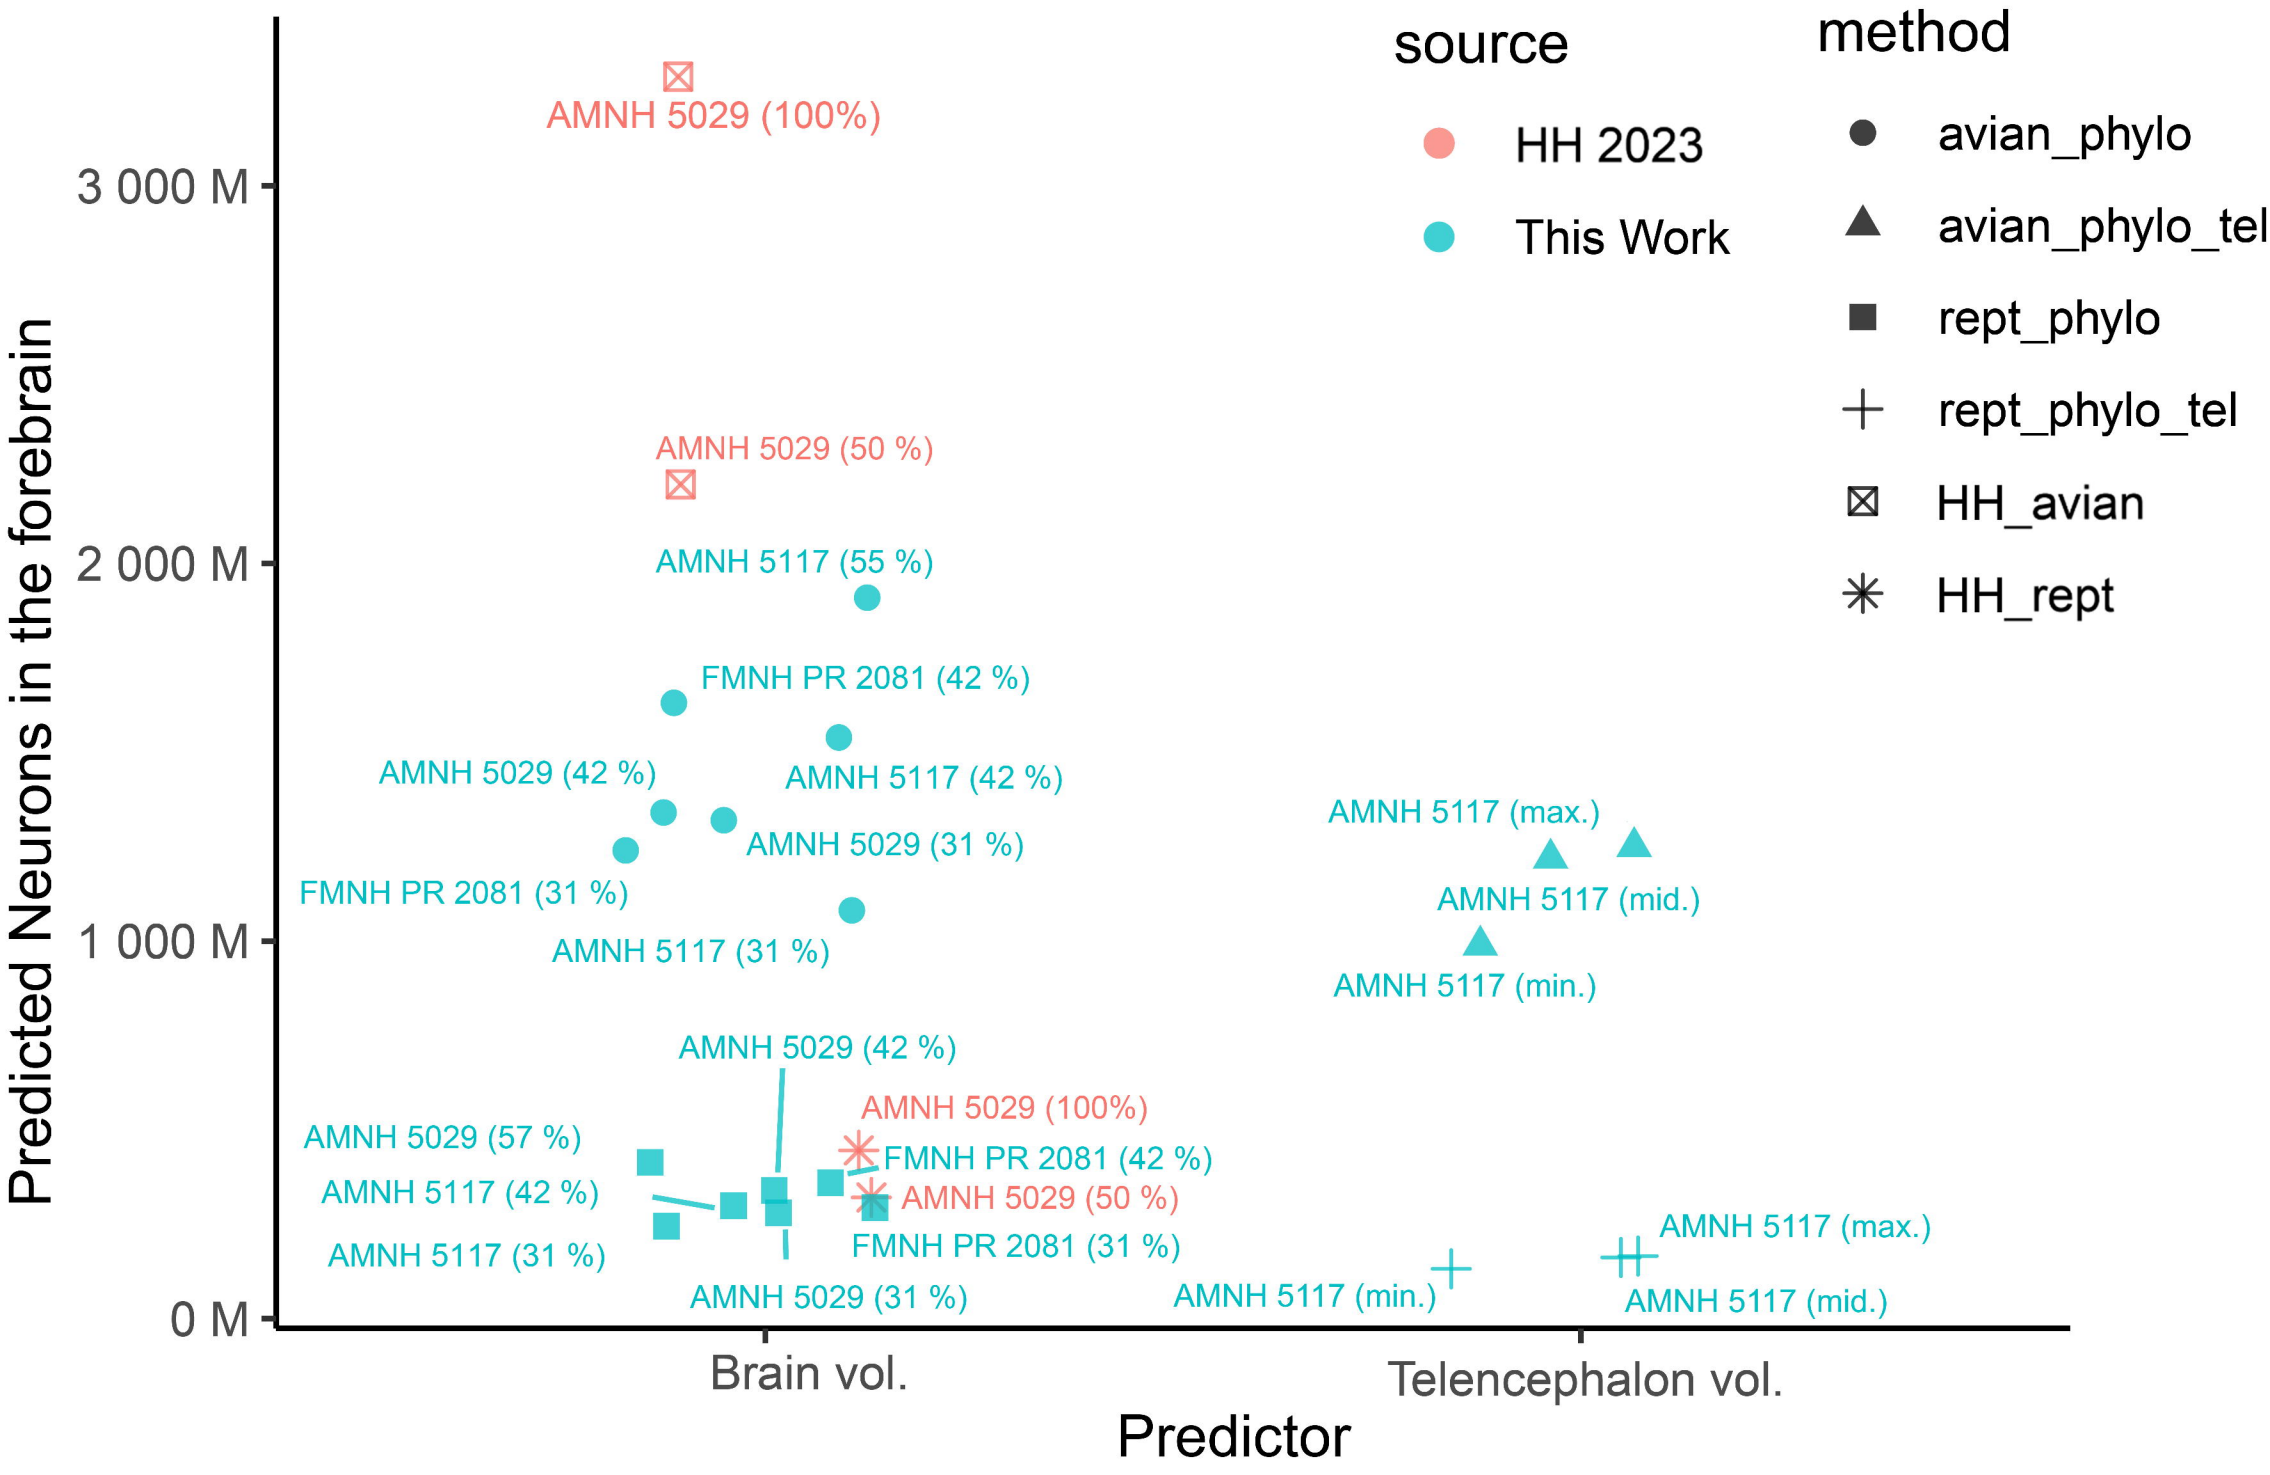

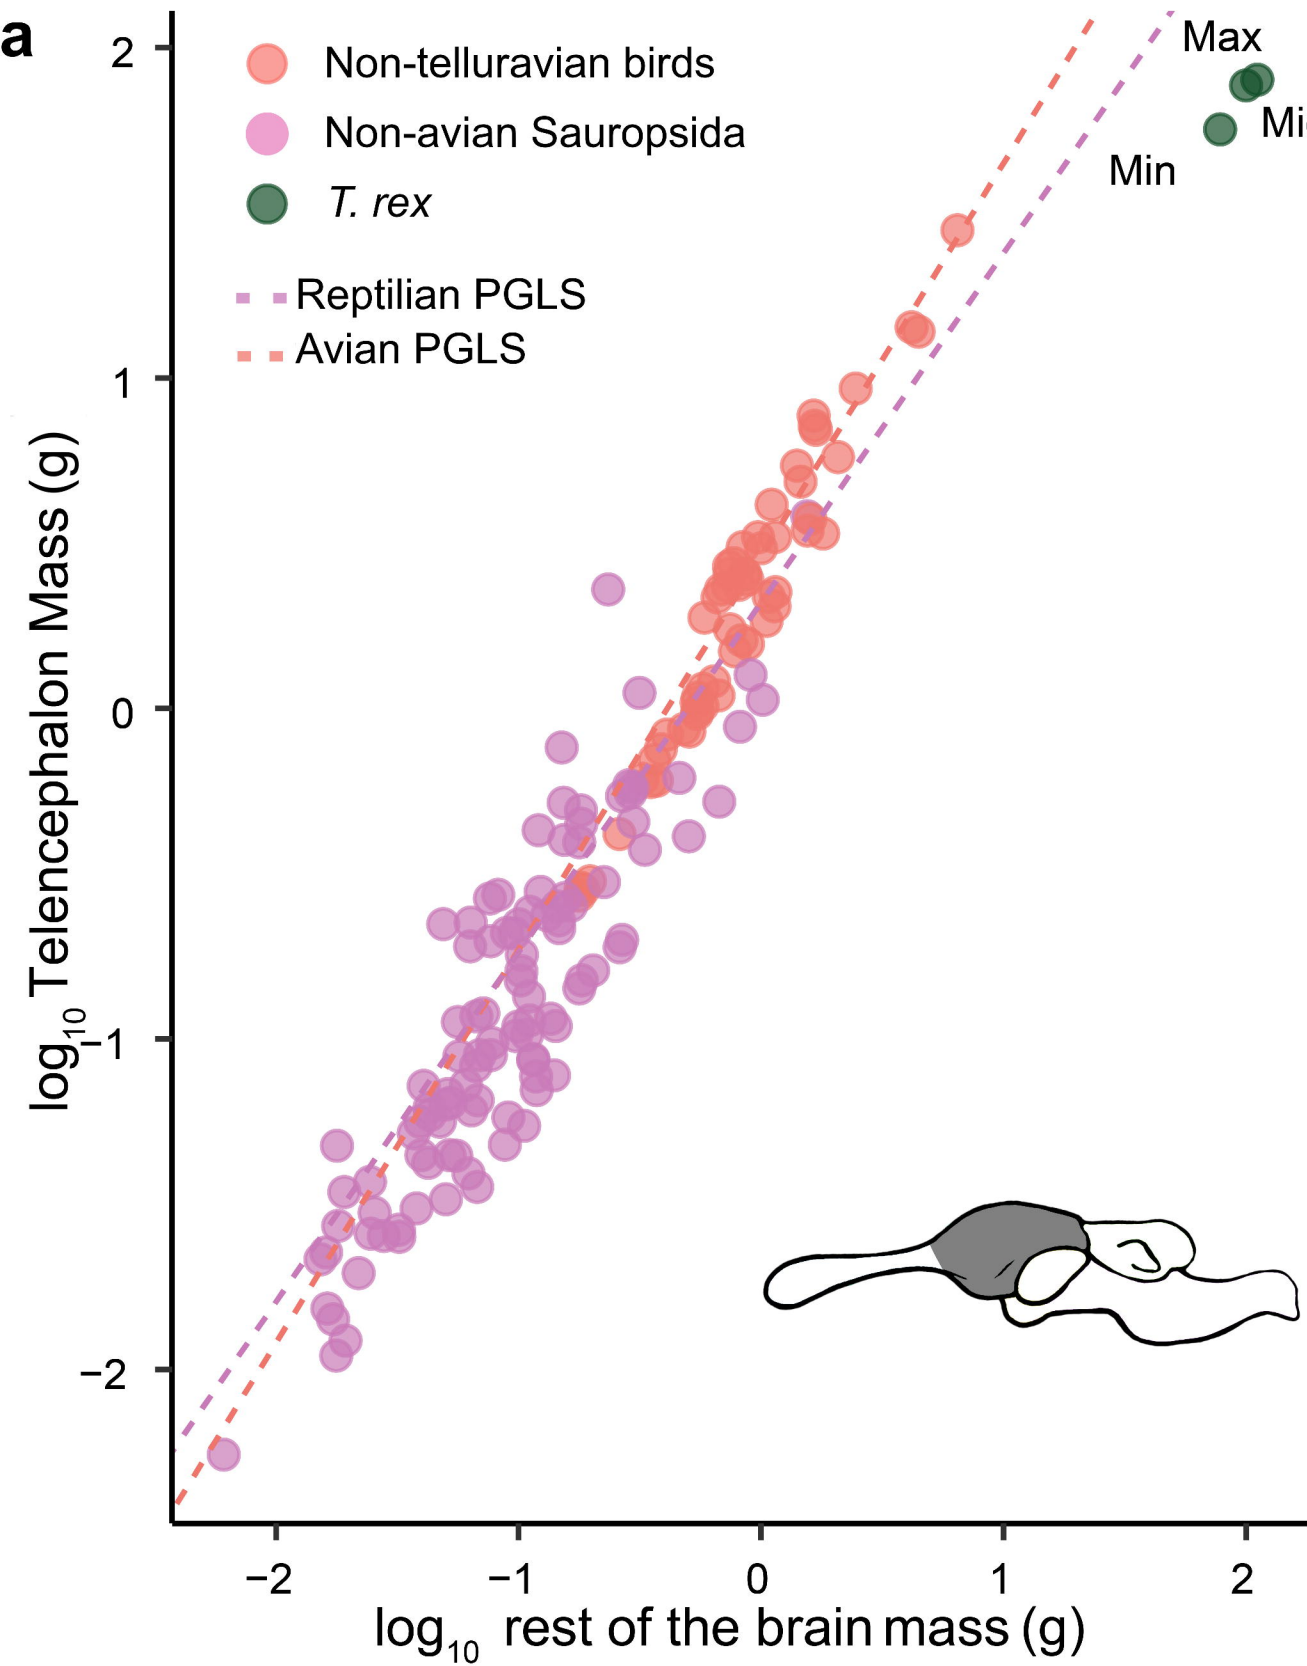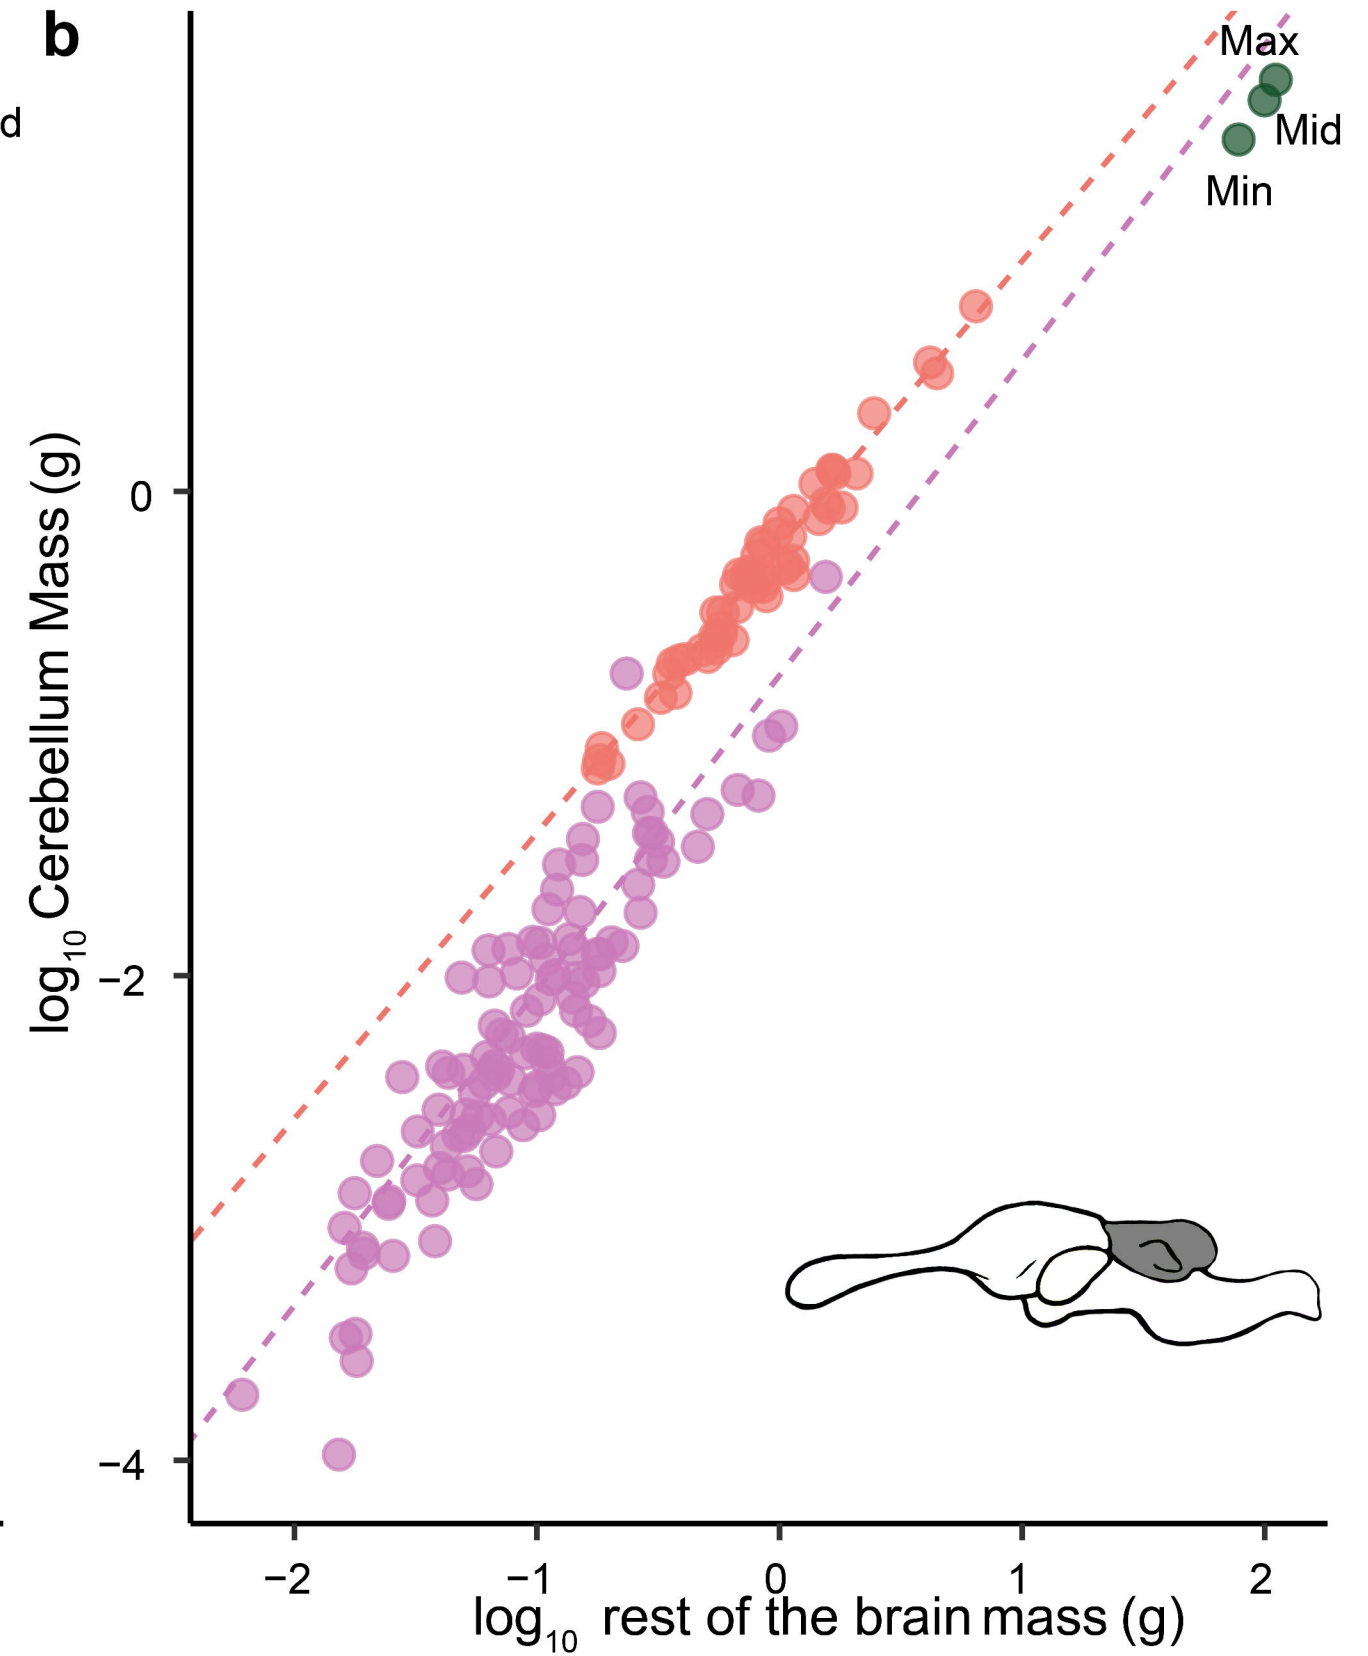

Source: https://www.biorxiv.org/content/10.1101/2024.01.10.575006v2.full.pdf
